# Supplementary material for: Large-scale animal model study uncovers altered brain pH and lactate levels as a transdiagnostic endophenotype of neuropsychiatric disorders involving cognitive impairment
Source: eLife. 2024 Mar 26;12:RP89376. doi: 10.7554/eLife.89376 (PMC10965225; doi:10.7554/eLife.89376)
Supplement: Supplementary file 2. [file elife-89376-supp2.xlsx]

## Sheet: TableS2
Supplementary File 2. Raw data of brain pH and lactate, as well as information about animals and brain samples (age at sampling, sex, duration of storage in the freezer, and treatment procedures)
	Strain/condition	Group	Sex (F, female; M, male)	Age (weeks)	Storage duration (days)	pH	Lactate (mM)	Note
1	APP Tg	Wild type	M	29.1429	1	6.98833	3.4
	APP Tg	Wild type	M	29.1429	1	7.01433	3.2
	APP Tg	Wild type	M	29.1429	1	7.01567	3.1
	APP Tg	Wild type	M	29.1429	1	7.00067	3.4
	APP Tg	Wild type	M	29.1429	1	7.034	3.2
	APP Tg	Wild type	M	29.1429	1	6.988	3.3
	APP Tg	Wild type	M	29.1429	1	6.99667	3.4
	APP Tg	Wild type	M	29.1429	1	7.02167	3
	APP Tg	Wild type	M	29.1429	1	6.99333	3.3
	APP Tg	Mutant	M	29.1429	1	7	3.4
	APP Tg	Mutant	M	29.1429	1	6.97833	3.7
	APP Tg	Mutant	M	29.1429	1	6.978	3.6
	APP Tg	Mutant	M	29.1429	1	6.97633	3.6
	APP Tg	Mutant	M	29.1429	1	6.98467	3.5
	APP Tg	Mutant	M	29.1429	1	7.00033	3.4
	APP Tg	Mutant	M	29.1429	1	6.97667	3.6
2	Arid1b KO	Wild type	M	57	829	7.002	2.9
	Arid1b KO	Wild type	M	55.5714	829	6.986	2.9
	Arid1b KO	Wild type	M	55.5714	829	7.016	2.9
	Arid1b KO	Wild type	M	56	829	7.01433	2.4
	Arid1b KO	Wild type	M	55.7143	829	7.02533	2.4
	Arid1b KO	Wild type	M	56.5714	829	7.01	2.6
	Arid1b KO	Wild type	M	55.7143	829	7.011	2.7
	Arid1b KO	Wild type	M	55.7143	829	6.935	3.1
	Arid1b KO	Wild type	M	55.7143	829	7.02267	2.5
	Arid1b KO	Wild type	M	55.7143	829	7.00267	2.7
	Arid1b KO	Wild type	M	55.7143	829	6.99267	2.8
	Arid1b KO	Wild type	M	54.5714	829	6.99933	2.8
	Arid1b KO	Mutant	M	57	829	7.02767	2.7
	Arid1b KO	Mutant	M	55.5714	829	7.01533	2.8
	Arid1b KO	Mutant	M	55.5714	829	7.009	2.7
	Arid1b KO	Mutant	M	56	829	7.00533	3
	Arid1b KO	Mutant	M	56.5714	829	7.02933	2.6
	Arid1b KO	Mutant	M	55.7143	829	7.02067	2.6
	Arid1b KO	Mutant	M	55.7143	829	7.00067	2.7
	Arid1b KO	Mutant	M	54.5714	829	6.95667	3.1
3	Auts2 KO_1st	Wild type	M	14.4286	38	7.106	2.8
	Auts2 KO_1st	Wild type	M	14.4286	38	7.05667	3.1
	Auts2 KO_1st	Wild type	M	14.1429	28	7.05667	3.2
	Auts2 KO_1st	Wild type	M	14.4286	28	7.05533	3.2
	Auts2 KO_1st	Wild type	M	14.5714	28	7.09633	3
	Auts2 KO_1st	Mutant	M	14.4286	38	7.09133	3.1
	Auts2 KO_1st	Mutant	M	14.4286	28	7.08433	3.6
	Auts2 KO_1st	Mutant	M	14.5714	28	7.093	3.4
	Auts2 KO_1st	Mutant	M	14.1429	28	7.05667	3.3
	Auts2 KO_1st	Mutant	M	14.5714	17	7.12867	3.4
	Auts2 KO_2nd	Wild type	M	14.5714	117	7.088	3.1
	Auts2 KO_2nd	Wild type	M	15	102	7.04433	3.4
	Auts2 KO_2nd	Wild type	M	15	102	7.075	3.3
	Auts2 KO_2nd	Wild type	M	15	102	7.05533	3.1
	Auts2 KO_2nd	Wild type	M	15.2857	100	7.001	3.8
	Auts2 KO_2nd	Mutant	M	14.5714	117	7.10267	3.1
	Auts2 KO_2nd	Mutant	M	15	102	7.105	3.2
	Auts2 KO_2nd	Mutant	M	15	102	7.11	3.2
	Auts2 KO_2nd	Mutant	M	15.2857	100	7.06333	3.2
	Auts2 KO_2nd	Mutant	M	15	58	7.05733	3.3
4	Barp KO	Wild type	M	50.4286	1803	7.25567	3
	Barp KO	Wild type	M	50.4286	1803	7.19933	3
	Barp KO	Wild type	M	50.4286	1803	7.16567	3.2
	Barp KO	Wild type	M	50.4286	1803	7.12367	3.3
	Barp KO	Wild type	M	50.4286	1803	7.14567	3.4
	Barp KO	Wild type	M	50.4286	1803	7.152	3.2
	Barp KO	Wild type	M	50.4286	1803	7.17533	2.9
	Barp KO	Wild type	M	50.4286	1803	7.149	3.5
	Barp KO	Wild type	M	50.4286	1803	7.157	3.3
	Barp KO	Wild type	M	50.4286	1803	7.169	2.9
	Barp KO	Mutant	M	50.4286	1803	7.174	3.2
	Barp KO	Mutant	M	50.4286	1803	7.15467	3.4
	Barp KO	Mutant	M	50.4286	1803	7.184	2.9
	Barp KO	Mutant	M	50.4286	1803	7.14133	3.5
	Barp KO	Mutant	M	50.4286	1803	7.144	3.2
	Barp KO	Mutant	M	50.4286	1803	7.128	3.4
	Barp KO	Mutant	M	50.4286	1803	7.164	2.9
	Barp KO	Mutant	M	50.4286	1803	7.15567	3.4
	Barp KO	Mutant	M	50.4286	1803	7.13567	3.4
	Barp KO	Mutant	M	50.4286	1803	7.171	3.2
5	Bdnf KO	Wild type	M	81.5714	96	6.86	2.2
	Bdnf KO	Wild type	M	80.4286	96	6.86633	2.6
	Bdnf KO	Wild type	M	80.1429	96	6.83067	2.9
	Bdnf KO	Wild type	M	80.1429	96	6.83667	2.8
	Bdnf KO	Wild type	M	78.7143	96	6.84233	2.7
	Bdnf KO	Wild type	M	81.7143	96	6.90033	2.5
	Bdnf KO	Wild type	M	83.1429	96	6.89767	2.5
	Bdnf KO	Wild type	M	81.7143	96	6.88167	2.3
	Bdnf KO	Wild type	M	83.1429	96	6.842	2.6
	Bdnf KO	Mutant	M	83.1429	96	6.845	2.5
	Bdnf KO	Mutant	M	81.7143	96	6.84867	2.6
	Bdnf KO	Mutant	M	83.1429	96	6.845	2.4
	Bdnf KO	Mutant	M	81.7143	96	6.83267	2.7
	Bdnf KO	Mutant	M	80.1429	96	6.848	2.7
	Bdnf KO	Mutant	M	80.4286	96	6.84233	2.7
	Bdnf KO	Mutant	M	78.7143	96	6.84333	2.5
6	BTBR_1st	Control	M	11.5714	1	7.157	2.9	C57BL/6J mice were used as control strain.
	BTBR_1st	Control	M	11.5714	1	7.13533	3.2
	BTBR_1st	Control	M	11.8571	1	7.179	2.8
	BTBR_1st	Control	M	11.8571	1	7.169	3
	BTBR_1st	Control	M	11.8571	1	7.154	3
	BTBR_1st	Control	M	11.8571	1	7.144	3.1
	BTBR_1st	Control	M	11.8571	1	7.161	3
	BTBR_1st	Control	M	11.8571	1	7.12067	3.2
	BTBR_1st	Control	M	11.8571	1	7.12333	3.2
	BTBR_1st	BTBR	M	11.1429	1	7.19	3.1
	BTBR_1st	BTBR	M	11.1429	1	7.16467	2.9
	BTBR_1st	BTBR	M	11.1429	1	7.17633	2.7
	BTBR_1st	BTBR	M	11.1429	1	7.16	3
	BTBR_1st	BTBR	M	11.1429	1	7.118	2.9
	BTBR_1st	BTBR	M	11.1429	1	7.141	3.1
	BTBR_1st	BTBR	M	11.1429	1	7.20067	2.7
	BTBR_1st	BTBR	M	11.1429	1	7.18967	3
	BTBR_1st	BTBR	M	10.4286	1	7.18	2.8
	BTBR_1st	BTBR	M	10.4286	1	7.19833	2.9
	BTBR_1st	BTBR	M	10.4286	1	7.15733	3.1
	BTBR_1st	BTBR	M	10.4286	1	7.18667	2.9
	BTBR_2nd	Control	M	58.8571	1	7.12767	3.3
	BTBR_2nd	Control	M	58.8571	1	7.14	3.3
	BTBR_2nd	Control	M	58.8571	1	7.09867	3.1
	BTBR_2nd	Control	F	58.8571	1	7.158	3
	BTBR_2nd	Control	F	58.8571	1	7.14233	3
	BTBR_2nd	Control	F	58.8571	1	7.12033	3
	BTBR_2nd	Control	F	58.8571	1	7.153	3.2
	BTBR_2nd	Control	F	58.8571	1	7.095	3.3
	BTBR_2nd	Control	F	58.8571	1	7.13367	3
	BTBR_2nd	BTBR	M	58.1429	1	7.17367	3
	BTBR_2nd	BTBR	M	58.1429	1	7.17433	2.8
	BTBR_2nd	BTBR	M	58.1429	1	7.16067	3
	BTBR_2nd	BTBR	M	58.1429	1	7.103	2.9
	BTBR_2nd	BTBR	F	58.1429	1	7.14133	2.9
	BTBR_2nd	BTBR	F	58.1429	1	7.13833	3.5
	BTBR_2nd	BTBR	F	58.1429	1	7.16467	2.8
	BTBR_2nd	BTBR	F	58.1429	1	7.15433	2.9
	BTBR_2nd	BTBR	F	58.1429	1	7.189	2.7
7	Camk2a KO	Wild type	F	33	0	7.212	2.5
	Camk2a KO	Wild type	F	33.1429	0	7.23633	2.5
	Camk2a KO	Wild type	F	33.1429	0	7.18367	2.6
	Camk2a KO	Wild type	M	40.8571	0	7.19633	2.6
	Camk2a KO	Wild type	M	40.7143	0	7.19833	2.7
	Camk2a KO	Mutant	F	32.8571	0	7.13033	2.8
	Camk2a KO	Mutant	F	33.1429	0	7.16633	2.8
	Camk2a KO	Mutant	F	33.1429	0	7.13	2.9
	Camk2a KO	Mutant	M	33	0	7.125	2.9
	Camk2a KO	Mutant	M	33	0	7.16633	2.9
8	Camkk1 KO	Wild type	M	31.1429	2916	7.17267	2.3
	Camkk1 KO	Wild type	M	31.1429	2916	7.052	2.5
	Camkk1 KO	Wild type	M	31.1429	2916	7.065	2.4
	Camkk1 KO	Wild type	M	31.1429	2916	7.04933	2.5
	Camkk1 KO	Wild type	M	31.1429	2916	7.07	2.4
	Camkk1 KO	Wild type	M	31.1429	2916	7.08433	2.4
	Camkk1 KO	Mutant	M	31.1429	2916	7.11533	2.5
	Camkk1 KO	Mutant	M	31.1429	2916	7.102	2.5
	Camkk1 KO	Mutant	M	31.1429	2916	7.06933	2.2
	Camkk1 KO	Mutant	M	31.1429	2916	7.01167	2.9
	Camkk1 KO	Mutant	M	31.1429	2916	7.048	2.6
	Camkk1 KO	Mutant	M	31.1429	2916	7.06067	2.5
9	Ccnd2 KO	Wild type	F	15.4286	64	6.84	3.1
	Ccnd2 KO	Wild type	F	15.4286	64	6.81667	3.1
	Ccnd2 KO	Wild type	F	13.8571	47	6.79733	3.6
	Ccnd2 KO	Wild type	F	13.8571	47	6.83133	3.3
	Ccnd2 KO	Wild type	F	14.2857	15	6.792	3.1
	Ccnd2 KO	Wild type	F	14.2857	15	6.802	3.3
	Ccnd2 KO	Wild type	F	14.2857	15	6.811	3.2
	Ccnd2 KO	Wild type	M	14.2857	47	6.798	3.7
	Ccnd2 KO	Wild type	M	14.2857	47	6.73567	4
	Ccnd2 KO	Wild type	M	14.1429	47	6.781	3.7
	Ccnd2 KO	Wild type	M	13.8571	47	6.793	3.7
	Ccnd2 KO	Wild type	M	13.8571	47	6.80567	3.9
	Ccnd2 KO	Wild type	M	14.2857	15	6.82133	3.5
	Ccnd2 KO	Mutant	F	15.4286	64	6.85367	3.2
	Ccnd2 KO	Mutant	F	14.2857	47	6.76267	3.4
	Ccnd2 KO	Mutant	F	14.1429	47	6.77733	3.4
	Ccnd2 KO	Mutant	M	15.4286	64	6.83433	3.4
	Ccnd2 KO	Mutant	M	14.2857	47	6.79167	3.6
	Ccnd2 KO	Mutant	M	14.1429	47	6.809	3.2
	Ccnd2 KO	Mutant	M	13.8571	47	6.765	3.6
10	CFA treatment	Control	M	14.5714	6	7.00633	3.2	Mice (C57BL/6J) received an intraplantar injection of 10 μL CFA into the left hind paw. Control mice received intraplantar injections of saline. Brain sampling was performed 6 weeks after the injection.
	CFA treatment	Control	M	14.5714	6	6.99633	3
	CFA treatment	Control	M	14.5714	6	6.99433	2.9
	CFA treatment	Control	M	14.5714	6	6.87933	3.1
	CFA treatment	Control	M	14.5714	6	7.00167	3.1
	CFA treatment	Control	M	14.5714	6	7.01767	2.9
	CFA treatment	Control	M	14.5714	6	7.00433	2.9
	CFA treatment	Control	M	14.5714	6	6.99033	3
	CFA treatment	Control	M	14.5714	6	7.06967	2.9
	CFA treatment	Control	M	14.5714	6	7.00167	3
	CFA treatment	Control	M	14.5714	6	7.02467	2.8
	CFA treatment	Control	M	14.5714	6	7.01967	3.1
	CFA treatment	Complete Freund's adjuvant	M	14.5714	6	7.009	2.9
	CFA treatment	Complete Freund's adjuvant	M	14.5714	6	7.00633	3.1
	CFA treatment	Complete Freund's adjuvant	M	14.5714	6	7.02867	2.6
	CFA treatment	Complete Freund's adjuvant	M	14.5714	6	6.90033	3
	CFA treatment	Complete Freund's adjuvant	M	14.5714	6	6.98667	2.9
	CFA treatment	Complete Freund's adjuvant	M	14.5714	6	7.08867	2.9
	CFA treatment	Complete Freund's adjuvant	M	14.5714	6	7.03167	2.9
	CFA treatment	Complete Freund's adjuvant	M	14.5714	6	6.98833	2.9
	CFA treatment	Complete Freund's adjuvant	M	14.5714	6	6.99867	3.1
	CFA treatment	Complete Freund's adjuvant	M	14.5714	6	6.88267	3.1
	CFA treatment	Complete Freund's adjuvant	M	14.5714	6	7.00167	2.9
	CFA treatment	Complete Freund's adjuvant	M	14.5714	6	6.99333	2.9
11	Chd8 KO	Wild type	M	41	5	7.13133	2.8
	Chd8 KO	Wild type	M	41	5	7.12067	2.5
	Chd8 KO	Wild type	M	41	5	7.118	2.7
	Chd8 KO	Wild type	M	41	5	7.12233	2.3
	Chd8 KO	Wild type	M	41	5	7.11267	2.6
	Chd8 KO	Mutant	M	41	5	7.09567	3
	Chd8 KO	Mutant	M	41	5	7.07067	3.3
	Chd8 KO	Mutant	M	41	5	7.10233	2.8
	Chd8 KO	Mutant	M	41	5	7.07267	3
	Chd8 KO	Mutant	M	41	5	7.07467	3.1
12	Chn1 KO	Wild type	F	15.5714		6.84567	3.2
	Chn1 KO	Wild type	M	15.4286		6.71367	3
	Chn1 KO	Wild type	M	15.4286		6.809	3.2
	Chn1 KO	Wild type	F	16.7143		6.87267	2.9
	Chn1 KO	Wild type	M	14.8571		6.74667	3.1
	Chn1 KO	Wild type	M	14.8571		6.72667	3
	Chn1 KO	Mutant	F	14.8571		6.88933	2.8
	Chn1 KO	Mutant	M	15.4286		6.85467	3
	Chn1 KO	Mutant	F	15.5714		6.89333	3
	Chn1 KO	Mutant	F	16.7143		6.73233	3.2
	Chn1 KO	Mutant	F	16.7143		6.85733	3
	Chn1 KO	Mutant	F	16.7143		6.78067	3.1
	Chn1 KO	Mutant	M	14.8571		6.73233	3
13	Clock KO	Wild type	M	16.5714	1	7.06667	3.3
	Clock KO	Wild type	M	16.5714	1	7.06667	3
	Clock KO	Wild type	M	14.2857	1	7.07767	3
	Clock KO	Wild type	M	14.2857	1	7.082	2.9
	Clock KO	Wild type	M	13	1	7.10533	2.8
	Clock KO	Wild type	M	13	1	7.10033	3
	Clock KO	Wild type	M	10.2857	1	7.102	3.1
	Clock KO	Wild type	M	9.71429	1	7.10833	2.9
	Clock KO	Wild type	M	9.57143	1	7.077	3.2
	Clock KO	Wild type	M	9.14286	1	7.08667	3.2
	Clock KO	Mutant	M	16.5714	1	7.10467	3.1
	Clock KO	Mutant	M	13	1	7.10567	2.8
	Clock KO	Mutant	M	12.1429	1	7.148	2.7
	Clock KO	Mutant	M	12.1429	1	7.126	2.7
	Clock KO	Mutant	M	10.1429	1	7.133	2.7
	Clock KO	Mutant	M	10.1429	1	7.15	2.6
	Clock KO	Mutant	M	10.1429	1	7.14167	2.7
	Clock KO	Mutant	M	10.1429	1	7.13967	2.7
	Clock KO	Mutant	M	9.57143	1	7.114	2.8
	Clock KO	Mutant	M	9.57143	1	7.12067	2.7
	Clock KO	Mutant	M	9.57143	1	7.12267	2.7
14	Corticosterone treatment	Control	M	25.4286	8	7.01733	2.9	Mice (C57BL/6J) were treated with 0.1 mg/mL corticosterone in the drinking water for 3 months.
	Corticosterone treatment	Control	M	25.4286	8	7.06167	2.7
	Corticosterone treatment	Control	M	25.4286	8	7.01033	3.2
	Corticosterone treatment	Control	M	25.4286	8	6.99967	3.2
	Corticosterone treatment	Control	M	25.4286	8	7.04633	2.8
	Corticosterone treatment	Control	M	25.4286	8	7.03833	2.9
	Corticosterone treatment	Control	M	25.4286	8	7.03767	2.8
	Corticosterone treatment	Control	M	25.4286	8	7.04433	2.8
	Corticosterone treatment	Control	M	25.4286	8	7.047	2.6
	Corticosterone treatment	Control	M	25.4286	8	7.03767	2.9
	Corticosterone treatment	Control	M	25.4286	8	7.03233	2.9
	Corticosterone treatment	Control	M	25.4286	8	7.00933	3
	Corticosterone treatment	Control	M	25.4286	8	7.03333	2.6
	Corticosterone treatment	Control	M	25.4286	8	7.04067	2.7
	Corticosterone treatment	Control	M	25.4286	8	7.02967	2.7
	Corticosterone treatment	Control	M	25.4286	8	7.03933	2.8
	Corticosterone treatment	Control	M	25.4286	8	6.99933	2.6
	Corticosterone treatment	Control	M	25.4286	8	7.03367	2.7
	Corticosterone treatment	Control	M	25.4286	8	7.04833	2.7
	Corticosterone treatment	Control	M	25.4286	8	6.99833	2.9
	Corticosterone treatment	Corticosterone	M	25.4286	8	6.993	2.8
	Corticosterone treatment	Corticosterone	M	25.4286	8	6.99867	3.3
	Corticosterone treatment	Corticosterone	M	25.4286	8	6.92167	3.5
	Corticosterone treatment	Corticosterone	M	25.4286	8	6.96933	3.3
	Corticosterone treatment	Corticosterone	M	25.4286	8	7.01233	2.8
	Corticosterone treatment	Corticosterone	M	25.4286	8	7.00233	2.9
	Corticosterone treatment	Corticosterone	M	25.4286	8	6.99067	3.5
	Corticosterone treatment	Corticosterone	M	25.4286	8	6.981	3.1
	Corticosterone treatment	Corticosterone	M	25.4286	8	6.89233	3.7
	Corticosterone treatment	Corticosterone	M	25.4286	8	6.92333	3.6
	Corticosterone treatment	Corticosterone	M	25.4286	8	6.94667	3.6
15	Crmp2 KO	Wild type	M	29		6.823	5
	Crmp2 KO	Wild type	M	24		6.92333	4.1
	Crmp2 KO	Wild type	M	24		6.84333	4.8
	Crmp2 KO	Wild type	M	17		6.94	3.9
	Crmp2 KO	Wild type	M	16		6.98133	4.2
	Crmp2 KO	Wild type	M	16		6.88167	4.8
	Crmp2 KO	Mutant	M	29		6.985	3.6
	Crmp2 KO	Mutant	M	24		6.847	5.1
	Crmp2 KO	Mutant	M	17		6.88	4.8
	Crmp2 KO	Mutant	M	17		7.026	3.3
	Crmp2 KO	Mutant	M	16		6.95367	3.5
	Crmp2 KO	Mutant	M	16		7.02133	3.1
16	Dextran treatment	Control	M	11.2857	60	6.99933	2.3	Mice (C57BL/6J) were given dextran sulfate sodium in drinking water (2.5%) for 5 days.
	Dextran treatment	Control	M	11.2857	60	6.98633	2.5
	Dextran treatment	Control	M	11.2857	60	7.00567	2.3
	Dextran treatment	Control	M	11.2857	60	7.02033	2.6
	Dextran treatment	Control	M	11.2857	60	7.03633	2
	Dextran treatment	Control	M	11.2857	60	7.02667	2.6
	Dextran treatment	Control	M	11.2857	60	7.01733	2.7
	Dextran treatment	Control	M	11.2857	60	6.97167	2.9
	Dextran treatment	Control	M	11.2857	60	7.00933	2.4
	Dextran treatment	Control	M	11.2857	60	7.04033	2.4
	Dextran treatment	Control	M	11.2857	60	7.03667	2.4
	Dextran treatment	Control	M	11.2857	60	7.036	2.2
	Dextran treatment	Dextran	M	11.2857	60	7.032	2.7
	Dextran treatment	Dextran	M	11.2857	60	6.94233	2.9
	Dextran treatment	Dextran	M	11.2857	60	7.025	2.5
	Dextran treatment	Dextran	M	11.2857	60	6.96733	2.8
	Dextran treatment	Dextran	M	11.2857	60	6.94333	2.7
	Dextran treatment	Dextran	M	11.2857	60	6.99167	2.5
	Dextran treatment	Dextran	M	11.2857	60	6.95967	3
	Dextran treatment	Dextran	M	11.2857	60	6.96067	3
	Dextran treatment	Dextran	M	11.2857	60	7.00133	2.6
	Dextran treatment	Dextran	M	11.2857	60	6.97633	3
	Dextran treatment	Dextran	M	11.2857	60	6.966	2.6
	Dextran treatment	Dextran	M	11.2857	60	6.98967	2.3
17	Disc1-L100P Tg	Wild type	M	29.7143	1833	7.147	2.6
	Disc1-L100P Tg	Wild type	M	29.5714	1833	7.10333	2.8
	Disc1-L100P Tg	Wild type	M	29.5714	1833	7.11433	2.6
	Disc1-L100P Tg	Wild type	M	29.5714	1833	7.168	2.5
	Disc1-L100P Tg	Wild type	M	27.7143	1833	7.09867	2.5
	Disc1-L100P Tg	Wild type	M	27.7143	1833	7.12567	2.6
	Disc1-L100P Tg	Mutant	M	29.7143	1833	7.177	2.5
	Disc1-L100P Tg	Mutant	M	29.7143	1833	7.136	2.7
	Disc1-L100P Tg	Mutant	M	29.5714	1833	7.10433	2.5
	Disc1-L100P Tg	Mutant	M	29.5714	1833	7.11467	2.5
	Disc1-L100P Tg	Mutant	M	27.7143	1833	7.13933	2.5
	Disc1-L100P Tg	Mutant	M	27.7143	1833	7.10333	2.8
18	Disc1-Q31L Tg	Wild type	M	37.7143	1938	7.11567	2.8
	Disc1-Q31L Tg	Wild type	M	37.7143	1938	7.09	3.3
	Disc1-Q31L Tg	Wild type	M	37.5714	1938	7.05767	3.1
	Disc1-Q31L Tg	Wild type	M	36.2857	1938	7.109	3.2
	Disc1-Q31L Tg	Wild type	M	34.4286	1938	7.11167	2.8
	Disc1-Q31L Tg	Wild type	M	34.2857	1938	7.11567	3.1
	Disc1-Q31L Tg	Mutant	M	37.7143	1938	7.09033	3.2
	Disc1-Q31L Tg	Mutant	M	37.5714	1938	7.11233	3.1
	Disc1-Q31L Tg	Mutant	M	36.2857	1938	7.10867	3
	Disc1-Q31L Tg	Mutant	M	36.2857	1938	7.10233	3.2
	Disc1-Q31L Tg	Mutant	M	34.4286	1938	7.095	3.2
	Disc1-Q31L Tg	Mutant	M	34.2857	1938	7.14433	2.9
19	Dyrk1a KO	Wild type	M	15.8571	2	7.19267	2.5
	Dyrk1a KO	Wild type	M	10.8571	2	7.16	2.8
	Dyrk1a KO	Wild type	M	15.8571	2	7.15633	2.9
	Dyrk1a KO	Wild type	M	14.7143	2	7.15567	2.7
	Dyrk1a KO	Wild type	M	14.4286	2	7.17633	2.7
	Dyrk1a KO	Mutant	M	14.4286	2	7.19867	2.6
	Dyrk1a KO	Mutant	M	10.8571	2	7.169	2.8
	Dyrk1a KO	Mutant	M	15.8571	2	7.20533	2.8
	Dyrk1a KO	Mutant	M	15.8571	2	7.19633	2.9
	Dyrk1a KO	Mutant	M	14.7143	2	7.19467	2.6
20	ECS treatment	Control	M	9-10	1	7.09833	2.8	Current: 25 mA, Shock duration: 1 s, Frequency: 100 pulse/s, Pulse width: 0.5 msec (ECT Unit, Ugo Basile)
	ECS treatment	Control	M	9-10	1	7.108	2.6
	ECS treatment	Control	M	9-10	1	7.09733	2.9
	ECS treatment	Control	M	9-10	1	7.07767	2.9
	ECS treatment	Control	M	9-10	1	7.12467	2.7
	ECS treatment	Control	M	9-10	1	7.05967	2.8
	ECS treatment	Control	M	9-10	1	7.07167	2.8
	ECS treatment	Control	M	9-10	1	7.14367	2.7
	ECS treatment	ECS_1hr	M	9-10	1	6.98633	3.3
	ECS treatment	ECS_1hr	M	9-10	1	7.00233	3.3
	ECS treatment	ECS_1hr	M	9-10	1	7.08833	2.9
	ECS treatment	ECS_1hr	M	9-10	1	7.05533	3
	ECS treatment	ECS_1hr	M	9-10	1	7.08167	3.3
	ECS treatment	ECS_1hr	M	9-10	1	7.00933	3.1
	ECS treatment	ECS_1hr	M	9-10	1	7.038	2.9
	ECS treatment	ECS_1hr	M	9-10	1	7.03067	3.1
21	Fmr1 KO	Control	M	39.1429	2	6.92967	3.4
	Fmr1 KO	Control	M	37.7143	2	6.91833	4
	Fmr1 KO	Control	M	37.7143	2	6.95333	3.4
	Fmr1 KO	Control	M	36.5714	2	6.934	3.7
	Fmr1 KO	Control	M	36.5714	2	6.937	3.3
	Fmr1 KO	Control	M	36.5714	2	6.95167	3.7
	Fmr1 KO	Control	M	34.5714	2	6.95833	3.5
	Fmr1 KO	Mutant	M	37.7143	2	6.98067	3.2
	Fmr1 KO	Mutant	M	39.1429	2	6.93367	3.5
	Fmr1 KO	Mutant	M	37.7143	2	6.95267	3.1
	Fmr1 KO	Mutant	M	36.8571	2	6.93267	3.3
	Fmr1 KO	Mutant	M	36.8571	2	6.97667	3.1
	Fmr1 KO	Mutant	M	36.5714	2	6.93067	3.5
	Fmr1 KO	Mutant	M	36.5714	2	6.95567	3.4
	Fmr1 KO	Mutant	M	36.5714	2	6.94867	3.2
	Fmr1 KO	Mutant	M	34.5714	2	6.95967	3.5
22	Gasc1 KO_1st	Control	M	64.1429	2457	7.08867	3.5
	Gasc1 KO_1st	Control	M	64.1429	2457	7.09767	3.4
	Gasc1 KO_1st	Control	M	64.1429	2457	7.10233	3.6
	Gasc1 KO_1st	Control	M	64.1429	2457	7.142	3.2
	Gasc1 KO_1st	Control	M	64.1429	2457	7.086	3.5
	Gasc1 KO_1st	Control	M	64.1429	2457	7.10567	3.2
	Gasc1 KO_1st	Control	M	64.1429	2457	7.15733	2.6
	Gasc1 KO_1st	Control	M	64.1429	2457	7.131	3.3
	Gasc1 KO_1st	Control	M	64.1429	2457	7.08533	3.4
	Gasc1 KO_1st	Mutant	M	64.1429	2457	7.093	3.7
	Gasc1 KO_1st	Mutant	M	64.1429	2457	7.09833	3.8
	Gasc1 KO_1st	Mutant	M	64.1429	2457	7.11133	3.6
	Gasc1 KO_1st	Mutant	M	64.1429	2457	7.04467	3.5
	Gasc1 KO_1st	Mutant	M	64.1429	2457	7.129	3.3
	Gasc1 KO_1st	Mutant	M	64.1429	2457	7.10367	3.4
	Gasc1 KO_1st	Mutant	M	64.1429	2457	7.03533	4.4
	Gasc1 KO_1st	Mutant	M	64.1429	2457	7.09267	3.7
	Gasc1 KO_1st	Mutant	M	64.1429	2457	7.12167	3.7
	Gasc1 KO_1st	Mutant	M	64.1429	2457	7.087	3.3
	Gasc1 KO_2nd	Control	M	20.1429	15	7.17833	3.8
	Gasc1 KO_2nd	Control	M	20.1429	15	7.23633	3
	Gasc1 KO_2nd	Control	M	18	15	7.22767	2.5
	Gasc1 KO_2nd	Control	M	17.4286	15	7.14933	3.5
	Gasc1 KO_2nd	Control	M	17.4286	15	7.169	3.4
	Gasc1 KO_2nd	Mutant	M	20.1429	15	7.21833	3.2
	Gasc1 KO_2nd	Mutant	M	18	15	7.17867	3.4
	Gasc1 KO_2nd	Mutant	M	18	15	7.15533	3.2
	Gasc1 KO_2nd	Mutant	M	17.4286	15	7.23	3.2
	Gasc1 KO_3rd	Control	M	23.1429	3	7.124	3.6
	Gasc1 KO_3rd	Control	F	21.5714	3	7.12267	3.4
	Gasc1 KO_3rd	Control	F	21.5714	3	7.18733	2.6
	Gasc1 KO_3rd	Control	F	21.5714	3	7.16667	3.4
	Gasc1 KO_3rd	Control	M	21.5714	3	7.155	3.4
	Gasc1 KO_3rd	Control	F	21.1429	3	7.17033	3
	Gasc1 KO_3rd	Control	F	21.1429	3	7.177	2.9
	Gasc1 KO_3rd	Mutant	M	23.1429	3	7.12167	3.7
	Gasc1 KO_3rd	Mutant	F	21.5714	3	7.22533	3.1
	Gasc1 KO_3rd	Mutant	F	21.5714	3	7.19533	2.9
	Gasc1 KO_3rd	Mutant	F	21.5714	3	7.12067	3.6
	Gasc1 KO_3rd	Mutant	M	21.1429	3	7.20667	3.2
	Gasc1 KO_3rd	Mutant	F	21.1429	3	7.13933	3.4
	Gasc1 KO_3rd	Mutant	F	21.1429	3	7.14267	3.1
23	Glra4 KO	Wild type	M	57.1429	1	6.99533	3.4
	Glra4 KO	Wild type	M	57.1429	1	6.97967	3.7
	Glra4 KO	Wild type	M	57.1429	1	6.97967	3.5
	Glra4 KO	Wild type	M	57.1429	1	7.01367	3.2
	Glra4 KO	Wild type	M	57.1429	1	6.988	3.6
	Glra4 KO	Wild type	M	57.1429	1	6.99867	3.5
	Glra4 KO	Mutant	M	57.1429	1	7.008	3.2
	Glra4 KO	Mutant	M	57.1429	1	6.97333	3.6
	Glra4 KO	Mutant	M	57.1429	1	7.00133	3.5
	Glra4 KO	Mutant	M	57.1429	1	7.005	3.5
	Glra4 KO	Mutant	M	57.1429	1	7.00833	3.2
	Glra4 KO	Mutant	M	57.1429	1	6.98967	3.6
24	Grin1 KO (postnatal line)	Control	M	15.5		6.82767	3.6
	Grin1 KO (postnatal line)	Control	M	15.5		6.857	3.4
	Grin1 KO (postnatal line)	Control	M	15.5		6.824	3.5
	Grin1 KO (postnatal line)	Control	M	15.5		6.83167	3.7
	Grin1 KO (postnatal line)	Control	M	15.5		6.78233	4.2
	Grin1 KO (postnatal line)	Control	M	15.5		6.85267	3.4
	Grin1 KO (postnatal line)	Mutant	M	15.5		6.85767	3.5
	Grin1 KO (postnatal line)	Mutant	M	15.5		6.83	3.9
	Grin1 KO (postnatal line)	Mutant	M	15.5		6.861	3.4
	Grin1 KO (postnatal line)	Mutant	M	15.5		6.81767	3.7
	Grin1 KO (postnatal line)	Mutant	M	15.5		6.82633	3.6
	Grin1 KO (postnatal line)	Mutant	M	15.5		6.86433	3.1
25	Grin1 KO (adult line)	Control		14		6.83567	3.2
	Grin1 KO (adult line)	Control		14		6.786	3.7
	Grin1 KO (adult line)	Control		14		6.84033	3.1
	Grin1 KO (adult line)	Control		14		6.838	3.3
	Grin1 KO (adult line)	Control		14		6.771	3.4
	Grin1 KO (adult line)	Mutant		14		6.81567	3.8
	Grin1 KO (adult line)	Mutant		14		6.77767	4.1
	Grin1 KO (adult line)	Mutant		14		6.88067	2.9
	Grin1 KO (adult line)	Mutant		14		6.819	3.5
	Grin1 KO (adult line)	Mutant		14		6.79733	3.5
	Grin1 KO (adult line)	Mutant		14		6.802	3.5
26	Gunn rat	Control	M	11	5	7.09833	3.1	Wister rats were used as control strain.
	Gunn rat	Control	M	11	5	7.10933	3
	Gunn rat	Control	M	11	5	7.06067	3.1
	Gunn rat	Control	M	11	5	7.053	3.2
	Gunn rat	Control	M	11	5	7.114	3
	Gunn rat	Control	M	11	5	7.12233	3.2
	Gunn rat	Gunn	M	11	5	7.12133	3
	Gunn rat	Gunn	M	11	5	7.05567	3
	Gunn rat	Gunn	M	11	5	7.05867	3.4
	Gunn rat	Gunn	M	11	5	7.10333	3
	Gunn rat	Gunn	M	11	5	7.12267	2.9
27	Hivep2 KO	Wild type	M	35.7143	2	7.21567	2.7
	Hivep2 KO	Wild type	M	35.7143	2	7.20133	2.4
	Hivep2 KO	Wild type	M	35.7143	2	7.18833	2.5
	Hivep2 KO	Wild type	M	29.1429	2	7.17733	2.6
	Hivep2 KO	Wild type	F	36.7143	2	7.18933	2.3
	Hivep2 KO	Wild type	F	36.7143	2	7.204	2.8
	Hivep2 KO	Mutant	M	29.1429	2	7.159	3
	Hivep2 KO	Mutant	M	39.8571	2	7.16467	3
	Hivep2 KO	Mutant	F	45.4286	2	7.18467	3.2
	Hivep2 KO	Mutant	F	45.4286	2	7.18	3
	Hivep2 KO	Mutant	F	36.7143	2	7.15367	2.7
28	Hyponatremia	Control	M	10.7143	0	7.04	3	Mice (C57BL/6J) were treated subcutaneously with 1-desamino-8-D-arginine vasopressin via osmotic minipumpus for 3 weeks. The sham-operated mice were treated with saline with the same method and used as controls.
	Hyponatremia	Control	M	10.7143	0	7.01567	3.2
	Hyponatremia	Control	M	10.7143	0	6.95467	3.5
	Hyponatremia	Control	M	10.7143	0	6.96633	3.4
	Hyponatremia	Control	M	10.7143	0	7.05133	2.8
	Hyponatremia	Control	M	10.7143	0	7.029	3.2
	Hyponatremia	Control	M	10.7143	0	7.026	3.1
	Hyponatremia	Control	M	10.7143	0	7.01167	3.3
	Hyponatremia	Hyponatremia	M	10.7143	0	7.01767	3
	Hyponatremia	Hyponatremia	M	10.7143	0	6.975	3.3
	Hyponatremia	Hyponatremia	M	10.7143	0	7.008	3.2
	Hyponatremia	Hyponatremia	M	10.7143	0	6.96367	3.4
	Hyponatremia	Hyponatremia	M	10.7143	0	6.98267	3.3
	Hyponatremia	Hyponatremia	M	10.7143	0	6.98967	3.3
	Hyponatremia	Hyponatremia	M	10.7143	0	6.93533	3.6
	Hyponatremia	Hyponatremia	M	10.7143	0	6.964	3.5
29	Il18	Wild type	M	12.1429	78	7.10967	2.9
	Il18	Wild type	M	12.1429	78	7.083	3.3
	Il18	Wild type	M	12.1429	78	7.114	3
	Il18	Wild type	M	12.1429	78	7.119	2.9
	Il18	Wild type	M	12.1429	78	7.128	3.2
	Il18	Mutant	M	12.4286	96	7.08033	3.3
	Il18	Mutant	M	12.4286	96	7.068	3.5
	Il18	Mutant	M	12.4286	96	7.037	3.5
	Il18	Mutant	M	12.4286	96	7.08567	3.4
	Il18	Mutant	M	12.4286	96	7.04167	3.8
30	Ketamine_1st	Control	M	9.28571	2	7.11733	2.7	Mice (C57BL/6J) were treated with 100 or 20 mg/kg ketamine intraperitoneally 30 min before the brain sampling. The control mice were treated with saline.
	Ketamine_1st	Control	M	9.28571	2	7.10633	3
	Ketamine_1st	Control	M	9.28571	2	7.088	3
	Ketamine_1st	Control	M	9.28571	2	7.15033	2.9
	Ketamine_1st	Control	M	9.28571	2	7.10133	3
	Ketamine_1st	Control	M	9.28571	2	7.11067	2.8
	Ketamine_1st	Ketamine100	M	9.28571	2	7.084	2.9
	Ketamine_1st	Ketamine100	M	9.28571	2	7.063	3.1
	Ketamine_1st	Ketamine100	M	9.28571	2	7.126	3
	Ketamine_1st	Ketamine100	M	9.28571	2	7.06167	3.4
	Ketamine_1st	Ketamine100	M	9.28571	2	7.095	3
	Ketamine_1st	Ketamine100	M	9.28571	2	7.11067	2.7
	Ketamine_1st	Ketamine100	M	9.28571	2	7.06033	3.6
	Ketamine_2nd	Control	M	10.4286	69	7.09067	3.2
	Ketamine_2nd	Control	M	10.4286	69	7.08733	3
	Ketamine_2nd	Control	M	10.4286	69	7.025	4
	Ketamine_2nd	Control	M	10.4286	69	7.02833	3.8
	Ketamine_2nd	Control	M	10.4286	69	7.03333	3.4
	Ketamine_2nd	Control	M	10.4286	69	7.066	3.5
	Ketamine_2nd	Control	M	10.4286	69	7.04967	3.3
	Ketamine_2nd	Control	M	10.4286	69	7.03467	3.2
	Ketamine_2nd	Control	M	10.4286	69	7.08633	3.4
	Ketamine_2nd	Control	M	10.4286	69	7.05733	3.5
	Ketamine_2nd	Control	M	10.4286	69	7.05633	3.1
	Ketamine_2nd	Ketamine20	M	10.4286	69	7.06667	3.2
	Ketamine_2nd	Ketamine20	M	10.4286	69	7.05933	3.3
	Ketamine_2nd	Ketamine20	M	10.4286	69	7.061	3.4
	Ketamine_2nd	Ketamine20	M	10.4286	69	7.104	3
	Ketamine_2nd	Ketamine20	M	10.4286	69	7.053	3.3
	Ketamine_2nd	Ketamine20	M	10.4286	69	7.06367	3.4
	Ketamine_2nd	Ketamine20	M	10.4286	69	7.07	3.5
	Ketamine_2nd	Ketamine20	M	10.4286	69	7.08133	3.2
	Ketamine_2nd	Ketamine20	M	10.4286	69	7.06233	3.5
	Ketamine_2nd	Ketamine20	M	10.4286	69	7.062	3.6
	Ketamine_2nd	Ketamine20	M	10.4286	69	7.06033	3.5
	Ketamine_2nd	Ketamine20	M	10.4286	69	7.07833	3.5
	Ketamine_2nd	Ketamine20	M	10.4286	69	7.07867	3
	Ketamine_2nd	Ketamine20	M	10.4286	69	7.07133	3.2
	Ketamine_2nd	Ketamine20	M	10.4286	69	7.07167	3.4
	Ketamine_2nd	Ketamine20	M	10.4286	69	7.08833	3
	Ketamine_2nd	Ketamine20	M	10.4286	69	7.06967	2.7
	Ketamine_2nd	Ketamine20	M	10.4286	69	7.096	3
	Ketamine_2nd	Ketamine100	M	10.4286	69	7.069	3.3
	Ketamine_2nd	Ketamine100	M	10.4286	69	7.061	3.8
	Ketamine_2nd	Ketamine100	M	10.4286	69	7.102	3.3
	Ketamine_2nd	Ketamine100	M	10.4286	69	7.10667	3.2
	Ketamine_2nd	Ketamine100	M	10.4286	69	7.098	3.1
	Ketamine_2nd	Ketamine100	M	10.4286	69	7.08233	3.2
	Ketamine_2nd	Ketamine100	M	10.4286	69	7.109	3.2
	Ketamine_2nd	Ketamine100	M	10.4286	69	7.01167	3.8
	Ketamine_2nd	Ketamine100	M	10.4286	69	7.01833	3.7
	Ketamine_2nd	Ketamine100	M	10.4286	69	7.053	3.2
	Ketamine_2nd	Ketamine100	M	10.4286	69	7.115	2.9
33	Mdga1 KO	Wild type	M	26.1429	57	6.95367	3
	Mdga1 KO	Wild type	M	26.1429	57	6.93	3.3
	Mdga1 KO	Wild type	M	28.5714	57	6.953	3.1
	Mdga1 KO	Wild type	M	31	57	6.94967	3.1
	Mdga1 KO	Wild type	M	24.4286	5	6.94467	3.1
	Mdga1 KO	Wild type	M	24.4286	5	6.92033	3.1
	Mdga1 KO	Mutant	M	26.4286	57	6.94333	3.3
	Mdga1 KO	Mutant	M	26.4286	57	6.90167	3.6
	Mdga1 KO	Mutant	M	26.4286	57	6.98867	3.1
	Mdga1 KO	Mutant	M	26.4286	57	6.95767	3.2
	Mdga1 KO	Mutant	M	21	57	6.967	3
	Mdga1 KO	Mutant	M	26.4286	57	6.978	3
34	Mdga2 KO	Wild type	M	28.5714	57	6.97133	3.3
	Mdga2 KO	Wild type	M	30.2857	57	6.957	3.1
	Mdga2 KO	Wild type	M	24.4286	5	6.95467	3.1
	Mdga2 KO	Wild type	M	24.4286	5	6.95633	3.1
	Mdga2 KO	Wild type	M	24.4286	5	6.955	3.1
	Mdga2 KO	Wild type	M	24.4286	5	6.941	2.8
	Mdga2 KO	Mutant	M	25.4286	57	6.97767	3.1
	Mdga2 KO	Mutant	M	25.4286	57	6.952	3.3
	Mdga2 KO	Mutant	M	21.5714	5	6.989	2.9
	Mdga2 KO	Mutant	M	21.5714	5	6.923	3.1
	Mdga2 KO	Mutant	M	21.5714	5	6.95633	3
	Mdga2 KO	Mutant	M	21.5714	5	6.96267	3
35	Methamphetamine treatment	Methamphetamine	M	8-9	1	7.203	2.7	Mice (C57BL/6J) were treated with 3 mg/kg methamphetamine intraperitoneally 60 min before the brain sampling. Control mice were the same as them used in Ketamine_1st experiments.
	Methamphetamine treatment	Methamphetamine	M	8-9	1	7.10267	2.8
	Methamphetamine treatment	Methamphetamine	M	8-9	1	7.117	2.9
	Methamphetamine treatment	Methamphetamine	M	8-9	1	7.14333	2.8
	Methamphetamine treatment	Methamphetamine	M	8-9	1	7.09633	2.6
	Methamphetamine treatment	Methamphetamine	M	8-9	1	7.14767	2.8
	Methamphetamine treatment	Methamphetamine	M	8-9	1	7.12533	2.6
36	Nhe5 KO_1st	Wild type	M	10	63	7.177	3.2
	Nhe5 KO_1st	Wild type	M	10	63	7.18867	3
	Nhe5 KO_1st	Wild type	M	10	63	7.229	2.9
	Nhe5 KO_1st	Mutant	M	10	63	7.265	3.1
	Nhe5 KO_1st	Mutant	M	10	63	7.15333	3.2
	Nhe5 KO_1st	Mutant	M	10	63	7.154	3.4
	Nhe5 KO_1st	Mutant	M	10	63	7.13633	3.3
	Nhe5 KO_1st	Mutant	M	10	63	7.172	3.2
	Nhe5 KO_2nd	Wild type	M	10		7.19	3.1
	Nhe5 KO_2nd	Wild type	M	10		7.109	2.8
	Nhe5 KO_2nd	Wild type	M	10		7.09967	3.2
	Nhe5 KO_2nd	Wild type	M	10		7.12667	3
	Nhe5 KO_2nd	Wild type	M	10		7.09833	3.4
	Nhe5 KO_2nd	Mutant	M	10		7.00167	3.7
	Nhe5 KO_2nd	Mutant	M	10		7.06233	3.1
	Nhe5 KO_2nd	Mutant	M	10		7.05	3.5
	Nhe5 KO_2nd	Mutant	M	10		7.08833	2.9
	Nhe5 KO_2nd	Mutant	M	10		7.07733	2.9
37	Nlgn3-R451C Tg	Wild type	M	14.7143	2	7.078	3.1
	Nlgn3-R451C Tg	Wild type	M	14.7143	2	7.12333	2.7
	Nlgn3-R451C Tg	Wild type	M	14.7143	2	7.09533	3
	Nlgn3-R451C Tg	Wild type	M	14.7143	2	7.08767	2.9
	Nlgn3-R451C Tg	Wild type	M	14.7143	2	7.10467	3
	Nlgn3-R451C Tg	Wild type	M	14.7143	2	7.08967	3.3
	Nlgn3-R451C Tg	Mutant	M	14.7143	2	7.13	2.8
	Nlgn3-R451C Tg	Mutant	M	14.7143	2	7.11333	2.8
	Nlgn3-R451C Tg	Mutant	M	14.7143	2	7.02267	3.5
	Nlgn3-R451C Tg	Mutant	M	14.7143	2	7.10433	3
	Nlgn3-R451C Tg	Mutant	M	14.7143	2	7.09867	2.8
	Nlgn3-R451C Tg	Mutant	M	14.7143	2	7.10167	3
	Nlgn3-R451C Tg	Mutant	M	14.7143	2	7.08633	3.2
	Nlgn3-R451C Tg	Mutant	M	14.7143	2	7.11633	3.2
26	Nr3c1 KO	Wild type	M	34.2857	226	6.93467	2.6
	Nr3c1 KO	Wild type	M	33.5714	226	6.93567	2.2
	Nr3c1 KO	Wild type	M	33.5714	226	6.925	2.6
	Nr3c1 KO	Wild type	M	32.7143	226	6.90233	2.7
	Nr3c1 KO	Wild type	M	30.1429	226	6.92433	2.2
	Nr3c1 KO	Wild type	M	30.1429	226	6.90633	2.5
	Nr3c1 KO	Wild type	M	25.5714	226	6.899	2.3
	Nr3c1 KO	Wild type	M	25.1429	226	6.90533	2.3
	Nr3c1 KO	Wild type	M	22.2857	226	6.90467	2.3
	Nr3c1 KO	Wild type	M	22.2857	226	6.906	2.2
	Nr3c1 KO	Mutant	M	34.1429	226	6.94067	2
	Nr3c1 KO	Mutant	M	34.1429	226	6.911	2.5
	Nr3c1 KO	Mutant	M	34.1429	226	6.90433	2.5
	Nr3c1 KO	Mutant	M	32.7143	226	6.91933	2.3
	Nr3c1 KO	Mutant	M	32.7143	226	6.93267	2.3
	Nr3c1 KO	Mutant	M	32.7143	226	6.88633	2.5
	Nr3c1 KO	Mutant	M	32.5714	226	6.89767	2.3
	Nr3c1 KO	Mutant	M	25.5714	226	6.913	2
	Nr3c1 KO	Mutant	M	25.5714	226	6.905	2.3
	Nr3c1 KO	Mutant	M	30.1429	226	6.90867	2.4
	Nr3c1 KO	Mutant	M	30.1429	226	6.918	2.2
	Nr3c1 KO	Mutant	M	22.2857	226	6.894	2.3
	Nr3c1 KO	Mutant	M	34.2857	226	6.88833	2.3
	Nr3c1 KO	Mutant	M	34.2857	226	6.84833	2.7
	Nr3c1 KO	Mutant	M	34.2857	226	6.88167	2.5
38	Nrgn KO	Wild type	F	31.7143	0	7.14433	2.8
	Nrgn KO	Wild type	F	30.8571	0	7.14633	2.7
	Nrgn KO	Wild type	F	30.8571	0	7.14467	2.5
	Nrgn KO	Wild type	F	30.8571	0	7.18667	2.5
	Nrgn KO	Wild type	F	31	0	7.172	2.5
	Nrgn KO	Wild type	F	30.8571	0	7.18033	2.5
	Nrgn KO	Mutant	F	35.7143	0	7.10033	2.9
	Nrgn KO	Mutant	F	35.8571	0	7.07133	3.2
	Nrgn KO	Mutant	F	31	0	7.11267	3
	Nrgn KO	Mutant	F	31	0	7.07067	3.2
	Nrgn KO	Mutant	F	30.8571	0	7.16333	2.6
39	Oxamate treatment	Control	M		137	7.158	2.8	Mice (C57BL/6J) were treated with 1 g/kg sodium oxamate intraperitoneally once daily for 10 days. Behavioral tests were performed and tissue sampling was performed 8 days after the last injection.
	Oxamate treatment	Control	M		137	7.13267	3
	Oxamate treatment	Control	M		137	7.00467	3.3
	Oxamate treatment	Control	M		137	7.14433	2.7
	Oxamate treatment	Control	M		137	7.18167	2.1
	Oxamate treatment	Control	M		137	7.08067	2.5
	Oxamate treatment	Control	M		137	7.061	2.9
	Oxamate treatment	Control	M		137	7.095	2.6
	Oxamate treatment	Control	M		137	7.09767	2.8
	Oxamate treatment	Control	M		137	7.03733	2.9
	Oxamate treatment	Control	M		137	7.16433	2.5
	Oxamate treatment	Control	M		137	7.08533	3.1
	Oxamate treatment	Control	M		137	7.127	2.7
	Oxamate treatment	Control	M		137	7.11867	3.1
	Oxamate treatment	Control	M		137	7.104	3.1
	Oxamate treatment	Control	M		137	7.11733	3
	Oxamate treatment	Control	M		137	7.08667	3.3
	Oxamate treatment	Control	M		137	6.96733	2.9
	Oxamate treatment	Control	M		137	7.102	2.4
	Oxamate treatment	OX	M		137	6.99967	2.8
	Oxamate treatment	OX	M		137	7.12633	2.7
	Oxamate treatment	OX	M		137	7.10367	2.4
	Oxamate treatment	OX	M		137	7.10633	2.9
	Oxamate treatment	OX	M		137	7.07	2.4
	Oxamate treatment	OX	M		137	7.01967	3.3
	Oxamate treatment	OX	M		137	7.196	2.4
	Oxamate treatment	OX	M		137	7.13367	3.1
	Oxamate treatment	OX	M		137	7.12767	3.2
	Oxamate treatment	OX	M		137	7.09033	2.9
	Oxamate treatment	OX	M		137	7.088	2.9
	Oxamate treatment	OX	M		137	7.01467	3.3
	Oxamate treatment	OX	M		137	7.16933	2.6
	Oxamate treatment	OX	M		137	7.12133	2.9
	Oxamate treatment	OX	M		137	6.98767	2.7
	Oxamate treatment	OX	M		137	7.06333	2.8
	Oxamate treatment	OX	M		137	7.10633	2.9
	Oxamate treatment	OX	M		137	7.09233	2.6
	Oxamate treatment	OX	M		137	7.104	2.5
	Oxamate treatment	OX	M		137	7.10767	2.7
40	Pacap KO	Wild type	M	24	2	7.13833	2.9
	Pacap KO	Wild type	M	24	2	7.11867	3.6
	Pacap KO	Wild type	M	24	2	7.15033	2.8
	Pacap KO	Wild type	M	24	2	7.15967	2.7
	Pacap KO	Wild type	M	24	2	7.122	2.8
	Pacap KO	Wild type	M	24	2	7.11567	2.9
	Pacap KO	Mutant	M	24	2	7.08	3.3
	Pacap KO	Mutant	M	24	2	7.12633	3.2
	Pacap KO	Mutant	M	24	2	7.105	3.2
	Pacap KO	Mutant	M	24	2	7.087	3.6
	Pacap KO	Mutant	M	24	2	7.08733	3
	Pacap KO	Mutant	M	24	2	7.07433	3.6
41	15q dup_1st	Wild type	M	23.1429	2826	7.09133	3
	15q dup_1st	Wild type	M	22.1429	2826	7.04633	3
	15q dup_1st	Wild type	M	21.4286	2826	7.07267	2.8
	15q dup_1st	Wild type	M	20.7143	2826	7.08067	2.8
	15q dup_1st	Wild type	M	20.7143	2826	7.051	2.7
	15q dup_1st	Wild type	M	20.5714	2826	7.04867	2.9
	15q dup_1st	Mutant	M	23.1429	2826	7.07833	3
	15q dup_1st	Mutant	M	22.1429	2826	7.04967	3.3
	15q dup_1st	Mutant	M	21.4286	2826	7.09433	2.8
	15q dup_1st	Mutant	M	20.7143	2826	7.132	2.4
	15q dup_1st	Mutant	M	20.7143	2826	7.04667	2.8
	15q dup_1st	Mutant	M	20.5714	2826	7.11567	2.7
	15q dup_2nd	Wild type	M	9.42857	43	7.09467	3.2
	15q dup_2nd	Wild type	M	9.42857	43	7.06267	3.1
	15q dup_2nd	Wild type	M	9.42857	43	7.095	2.7
	15q dup_2nd	Wild type	M	9.85714	43	7.091	3.2
	15q dup_2nd	Wild type	M	10	43	7.105	2.7
	15q dup_2nd	Mutant	M	9.42857	43	7.11933	2.9
	15q dup_2nd	Mutant	M	9.42857	43	7.16433	2.9
	15q dup_2nd	Mutant	M	9.42857	43	7.13067	4.7
	15q dup_2nd	Mutant	M	9.85714	43	7.19533	3
	15q dup_2nd	Mutant	M	10	43	7.11767	3.4
42	Phencyclidine and/or lurasidone treatment	Control	M	> 8		7.03933	3.1	Control group: Mice (C57BL/6J) get saline bid for 7 days with sacrifice 7 days after the last injection. PCP group: Mice get PCP ip 10 mg/kg bid for seven days and sacrifice 7 days later. PCP-Lur group: Mice get PCP 10 mg/kg bid for seven days, 7 days washout, then lurasidone for 7 daysd bid and sacrifice on day 28. Lur group: Mice get saline bid and then lurasidone on day 21.
	Phencyclidine and/or lurasidone treatment	Control	M	> 8		7.02967	3.3
	Phencyclidine and/or lurasidone treatment	Control	M	> 8		6.98933	3.8
	Phencyclidine and/or lurasidone treatment	Control	M	> 8		6.992	3.6
	Phencyclidine and/or lurasidone treatment	Control	M	> 8		6.95267	3.6
	Phencyclidine and/or lurasidone treatment	PCP	M	> 8		7.07133	3.5
	Phencyclidine and/or lurasidone treatment	PCP	M	> 8		7.059	3.3
	Phencyclidine and/or lurasidone treatment	PCP	M	> 8		6.97667	4.2
	Phencyclidine and/or lurasidone treatment	PCP	M	> 8		6.99867	5.7
	Phencyclidine and/or lurasidone treatment	PCP	M	> 8		6.97033	6.3
	Phencyclidine and/or lurasidone treatment	Lur	M	> 8		6.865	3.6
	Phencyclidine and/or lurasidone treatment	Lur	M	> 8		7.045	3.5
	Phencyclidine and/or lurasidone treatment	Lur	M	> 8		6.92367	3.6
	Phencyclidine and/or lurasidone treatment	Lur	M	> 8		6.90867	3.4
	Phencyclidine and/or lurasidone treatment	Lur	M	> 8		7.018	3.9
	Phencyclidine and/or lurasidone treatment	PCP+Lur	M	> 8		6.97033	3.3
	Phencyclidine and/or lurasidone treatment	PCP+Lur	M	> 8		6.96667	3.3
	Phencyclidine and/or lurasidone treatment	PCP+Lur	M	> 8		6.92567	3.3
	Phencyclidine and/or lurasidone treatment	PCP+Lur	M	> 8		7.044	3.5
	Phencyclidine and/or lurasidone treatment	PCP+Lur	M	>8		7.05067	3.7
43	Polg1 Tg	Wild type	M	83.5714	4	7.12667	4.3
	Polg1 Tg	Wild type	M	83.5714	4	7.157	2.8
	Polg1 Tg	Wild type	M	102.714	4	7.10967	3.2
	Polg1 Tg	Wild type	M	102.714	4	7.16833	2.8
	Polg1 Tg	Wild type	M	92.5714	4	7.19833	3
	Polg1 Tg	Wild type	M	76.5714	4	7.12167	3.3
	Polg1 Tg	Mutant	M	83.5714	4	7.126	3.9
	Polg1 Tg	Mutant	M	102.714	4	7.13867	3.1
	Polg1 Tg	Mutant	M	102.714	4	7.115	3.1
	Polg1 Tg	Mutant	M	92.5714	4	7.13467	3
	Polg1 Tg	Mutant	M	76.5714	4	7.14067	3.1
14	Ppp3r1 KO	Wild type	F	20.7143	0	7.13733	3.1
	Ppp3r1 KO	Wild type	F	21.4286	0	7.16467	2.7
	Ppp3r1 KO	Wild type	F	21	0	7.11467	2.9
	Ppp3r1 KO	Wild type	F	18.8571	0	7.121	2.9
	Ppp3r1 KO	Wild type	M	20.7143	0	7.13433	3.1
	Ppp3r1 KO	Wild type	M	20.7143	0	7.112	2.7
	Ppp3r1 KO	Mutant	F	21.4286	0	7.10433	3.1
	Ppp3r1 KO	Mutant	F	21.4286	0	7.078	3.2
	Ppp3r1 KO	Mutant	F	18.8571	0	7.08167	3.2
	Ppp3r1 KO	Mutant	M	20.7143	0	7.07	3.4
	Ppp3r1 KO	Mutant	M	20.7143	0	7.08633	3.3
44	Quinpirole treatment	Control	M	8	15	6.94633	3.8	Mice (C57BL/6J) were intraperitoneally injected with quinpirole (1 mg/kg) for nine days. Brain sampling was performed 35 min after the last injection.
	Quinpirole treatment	Control	M	8	15	6.98533	3.5
	Quinpirole treatment	Control	M	8	15	6.99567	3.4
	Quinpirole treatment	Control	M	8	15	6.975	3.6
	Quinpirole treatment	Control	M	8	15	6.89067	3.7
	Quinpirole treatment	Control	M	8	15	6.97467	3.4
	Quinpirole treatment	Quinpirole	M	8	15	7.013	3.8
	Quinpirole treatment	Quinpirole	M	8	15	6.986	3.8
	Quinpirole treatment	Quinpirole	M	8	15	6.96567	3.6
	Quinpirole treatment	Quinpirole	M	8	15	6.98	3.5
	Quinpirole treatment	Quinpirole	M	8	15	6.98767	3.6
	Quinpirole treatment	Quinpirole	M	8	15	7.003	3.2
45	Reln KO_1st	Wild type	M	10.1429	77	7.12767	2.5
	Reln KO_1st	Wild type	F	10.1429	77	7.105	2.5
	Reln KO_1st	Wild type	F	10.1429	77	7.11233	2.4
	Reln KO_1st	Wild type	F	10	61	7.09633	2.7
	Reln KO_1st	Mutant	F	10	61	7.076	2.8
	Reln KO_1st	Mutant	M	10.4286	39	7.12567	2.6
	Reln KO_1st	Mutant	M	10.4286	39	7.075	2.9
	Reln KO_1st	Mutant	M	10.4286	39	7.049	3.2
	Reln KO_1st	Mutant	F	10.4286	39	7.088	2.9
	Reln KO_1st	Mutant	F	10.4286	39	7.031	2.6
	Reln KO_1st	Mutant	F	10.4286	39	7.07767	2.9
	Reln KO_2nd	Wild type	M	10.5714	56	7.14367	2.8
	Reln KO_2nd	Wild type	F	10.2857	37	7.102	2.9
	Reln KO_2nd	Wild type	M	10	117	7.11	2.9
	Reln KO_2nd	Wild type	M	10	117	7.09433	3
	Reln KO_2nd	Wild type	F	10.2857	37	7.09167	2.6
	Reln KO_2nd	Wild type	M	10.2857	37	7.09067	2.8
	Reln KO_2nd	Mutant	F	10	117	7.085	2.8
	Reln KO_2nd	Mutant	M	10.2857	37	7.11033	3
	Reln KO_2nd	Mutant	F	10.5714	56	7.054	3.5
	Reln KO_2nd	Mutant	F	10.5714	56	7.104	3.1
	Reln KO_2nd	Mutant	F	10.2857	37	7.082	2.8
	Reln KO_2nd	Mutant	M	10.2857	37	7.08933	2.9
	Reln KO_2nd	Mutant	M	10	117	7.11833	2.7
	Reln KO_2nd	Mutant	F	10	117	7.106	2.7
	Reln KO_2nd	Mutant	M	10.2857	37	7.065	2.6
	Reln KO_2nd	Mutant	F	10	117	7.09367	2.8
	Reln KO_2nd	Mutant	M	10	117	7.06567	3
46	Scn2a KO	Wild type	M	8	69	6.899	3.1
	Scn2a KO	Wild type	M	8	69	6.95	2.9
	Scn2a KO	Wild type	M	8	15	6.97833	2.8
	Scn2a KO	Wild type	M	8	69	6.93567	3.1
	Scn2a KO	Wild type	M	8	15	6.98333	2.5
	Scn2a KO	Wild type	M	8	15	6.917	2.9
	Scn2a KO	Wild type	M	8	15	6.93833	2.5
	Scn2a KO	Mutant	M	8	69	6.94333	3
	Scn2a KO	Mutant	M	8	69	6.929	2.9
	Scn2a KO	Mutant	M	8	69	6.93767	3.1
	Scn2a KO	Mutant	M	8	69	6.94467	3.2
	Scn2a KO	Mutant	M	8	69	6.915	3
	Scn2a KO	Mutant	M	8	15	6.94233	3.1
	Scn2a KO	Mutant	M	8	69	6.908	3.4
47	Social defeat stress (acute)	Control	M			7.14133	3.3	Mice exposed to single social defeat stress for 10 min. Brain sampling was performed 10 min after the end of the exposure.
	Social defeat stress (acute)	Control	M			7.11367	3.4
	Social defeat stress (acute)	Control	M			7.14167	3.2
	Social defeat stress (acute)	Control	M			7.133	3.3
	Social defeat stress (acute)	Control	M			7.136	3.1
	Social defeat stress (acute)	Social defeat stress	M			7.07867	3.6
	Social defeat stress (acute)	Social defeat stress	M			7.062	3.8
	Social defeat stress (acute)	Social defeat stress	M			7.085	3.7
	Social defeat stress (acute)	Social defeat stress	M			7.079	3.5
	Social defeat stress (acute)	Social defeat stress	M			7.08067	3.5
56	Social defeat stress (chronic)_1st	Control	M	> 9		7.09933	3.7	Mice exposed to 10 day-session of social defeat stress. Brain sampling was performed 2 (1st batch)or 9 (2nd and 3rd batches) days after the last session.
	Social defeat stress (chronic)_1st	Control	M	> 9		7.08367	3.6
	Social defeat stress (chronic)_1st	Control	M	> 9		7.06867	3.7
	Social defeat stress (chronic)_1st	Control	M	> 9		7.12667	3.2
	Social defeat stress (chronic)_1st	Control	M	> 9		7.12733	3.9
	Social defeat stress (chronic)_1st	Control	M	> 9		7.12033	3.4
	Social defeat stress (chronic)_1st	Social defeat stress	M	> 9		7.09133	3.3
	Social defeat stress (chronic)_1st	Social defeat stress	M	> 9		7.086	3.5
	Social defeat stress (chronic)_1st	Social defeat stress	M	> 9		7.05	3.9
	Social defeat stress (chronic)_1st	Social defeat stress	M	> 9		7.06367	3.8
	Social defeat stress (chronic)_1st	Social defeat stress	M	> 9		7.04567	3.7
	Social defeat stress (chronic)_1st	Social defeat stress	M	> 9		7.11433	3.4
	Social defeat stress (chronic)_2nd	Control	M	> 9		7.12433	3
	Social defeat stress (chronic)_2nd	Control	M	> 9		7.11333	3.1
	Social defeat stress (chronic)_2nd	Control	M	> 9		7.11767	3.2
	Social defeat stress (chronic)_2nd	Control	M	> 9		7.146	3
	Social defeat stress (chronic)_2nd	Control	M	> 9		7.13767	3.3
	Social defeat stress (chronic)_2nd	Control	M	> 9		7.11767	3.3
	Social defeat stress (chronic)_2nd	Social defeat stress	M	> 9		7.07233	3.3
	Social defeat stress (chronic)_2nd	Social defeat stress	M	> 9		7.10467	3.3
	Social defeat stress (chronic)_2nd	Social defeat stress	M	> 9		7.10633	3.3
	Social defeat stress (chronic)_2nd	Social defeat stress	M	> 9		7.11267	3.4
	Social defeat stress (chronic)_2nd	Social defeat stress	M	> 9		7.06933	3.7
	Social defeat stress (chronic)_2nd	Social defeat stress	M	> 9		7.12033	3.2
	Social defeat stress (chronic)_3rd	Control	M	> 9		7.17933	2.8
	Social defeat stress (chronic)_3rd	Control	M	> 9		7.183	2.6
	Social defeat stress (chronic)_3rd	Control	M	> 9		7.19433	2.7
	Social defeat stress (chronic)_3rd	Control	M	> 9		7.16533	3
	Social defeat stress (chronic)_3rd	Control	M	> 9		7.18633	2.8
	Social defeat stress (chronic)_3rd	Control	M	> 9		7.19567	2.8
	Social defeat stress (chronic)_3rd	Control	M	> 9		7.175	2.7
	Social defeat stress (chronic)_3rd	Control	M	> 9		7.17933	2.6
	Social defeat stress (chronic)_3rd	Control	M	> 9		7.213	3
	Social defeat stress (chronic)_3rd	Control	M	> 9		7.18	2.5
	Social defeat stress (chronic)_3rd	Control	M	> 9		7.18033	2.8
	Social defeat stress (chronic)_3rd	Control	M	> 9		7.16733	2.6
	Social defeat stress (chronic)_3rd	Control	M	> 9		7.20633	2.5
	Social defeat stress (chronic)_3rd	Control	M	> 9		7.18767	2.8
	Social defeat stress (chronic)_3rd	Control	M	> 9		7.169	2.7
	Social defeat stress (chronic)_3rd	Control	M	> 9		7.16767	2.7
	Social defeat stress (chronic)_3rd	Control	M	> 9		7.17767	2.8
	Social defeat stress (chronic)_3rd	Control	M	> 9		7.16633	2.8
	Social defeat stress (chronic)_3rd	Control	M	> 9		7.166	2.8
	Social defeat stress (chronic)_3rd	Control	M	> 9		7.19233	2.6
	Social defeat stress (chronic)_3rd	Control	M	> 9		7.177	2.8
	Social defeat stress (chronic)_3rd	Control	M	> 9		7.18333	2.8
	Social defeat stress (chronic)_3rd	Control	M	> 9		7.19033	2.7
	Social defeat stress (chronic)_3rd	Control	M	> 9		7.19733	2.8
	Social defeat stress (chronic)_3rd	Control	M	> 9		7.171	2.7
	Social defeat stress (chronic)_3rd	Control	M	> 9		7.20333	2.8
	Social defeat stress (chronic)_3rd	Control	M	> 9		7.17067	2.8
	Social defeat stress (chronic)_3rd	Control	M	> 9		7.19033	2.7
	Social defeat stress (chronic)_3rd	Social defeat stress	M	> 9		7.16967	2.8
	Social defeat stress (chronic)_3rd	Social defeat stress	M	> 9		7.17267	2.7
	Social defeat stress (chronic)_3rd	Social defeat stress	M	> 9		7.15033	3
	Social defeat stress (chronic)_3rd	Social defeat stress	M	> 9		7.2	2.8
	Social defeat stress (chronic)_3rd	Social defeat stress	M	> 9		7.18767	2.7
	Social defeat stress (chronic)_3rd	Social defeat stress	M	> 9		7.15867	2.9
	Social defeat stress (chronic)_3rd	Social defeat stress	M	> 9		7.16867	2.8
	Social defeat stress (chronic)_3rd	Social defeat stress	M	> 9		7.164	2.9
	Social defeat stress (chronic)_3rd	Social defeat stress	M	> 9		7.181	2.8
	Social defeat stress (chronic)_3rd	Social defeat stress	M	> 9		7.162	2.8
	Social defeat stress (chronic)_3rd	Social defeat stress	M	> 9		7.193	2.6
	Social defeat stress (chronic)_3rd	Social defeat stress	M	> 9		7.14033	3.1
	Social defeat stress (chronic)_3rd	Social defeat stress	M	> 9		7.188	2.8
	Social defeat stress (chronic)_3rd	Social defeat stress	M	> 9		7.17233	2.8
	Social defeat stress (chronic)_3rd	Social defeat stress	M	> 9		7.13967	3
	Social defeat stress (chronic)_3rd	Social defeat stress	M	> 9		7.158	2.8
	Social defeat stress (chronic)_3rd	Social defeat stress	M	> 9		7.15833	2.7
	Social defeat stress (chronic)_3rd	Social defeat stress	M	> 9		7.15533	2.7
	Social defeat stress (chronic)_3rd	Social defeat stress	M	> 9		7.147	2.8
	Social defeat stress (chronic)_3rd	Social defeat stress	M	> 9		7.14633	3
	Social defeat stress (chronic)_3rd	Social defeat stress	M	> 9		7.15533	2.9
	Social defeat stress (chronic)_3rd	Social defeat stress	M	> 9		7.208	2.6
	Social defeat stress (chronic)_3rd	Social defeat stress	M	> 9		7.16267	2.9
	Social defeat stress (chronic)_3rd	Social defeat stress	M	> 9		7.169	2.9
	Social defeat stress (chronic)_3rd	Social defeat stress	M	> 9		7.181	2.5
	Social defeat stress (chronic)_3rd	Social defeat stress	M	> 9		7.14267	3.1
17	Sciatic nerve cuffing	Control	M	> 8		7.04567	3.3	A 2 mm section of polyethylene tubing was implanted around the main branch of the right sciatic nerve. Control mice underwent sham operation without cuff implantation.
	Sciatic nerve cuffing	Control	M	> 8		7.02933	3.2
	Sciatic nerve cuffing	Control	M	> 8		7.05767	3.1
	Sciatic nerve cuffing	Control	M	> 8		7.05967	3.3
	Sciatic nerve cuffing	Control	M	> 8		7.03833	3.4
	Sciatic nerve cuffing	Control	M	> 8		7.054	3.2
	Sciatic nerve cuffing	Control	M	> 8		7.00267	3.1
	Sciatic nerve cuffing	Control	M	> 8		7.022	3.5
	Sciatic nerve cuffing	Cuff	M	> 8		7.054	3.3
	Sciatic nerve cuffing	Cuff	M	> 8		6.953	3.3
	Sciatic nerve cuffing	Cuff	M	> 8		7.06033	3
	Sciatic nerve cuffing	Cuff	M	> 8		7.01633	3
	Sciatic nerve cuffing	Cuff	M	> 8		7.032	3.1
	Sciatic nerve cuffing	Cuff	M	> 8		7.05733	3.4
	Sciatic nerve cuffing	Cuff	M	> 8		7.007	3.5
	Sciatic nerve cuffing	Cuff	M	> 8		6.989	3.6
50	Sert KO	Wild type	M	30.4286	5	7.16233	2.6
	Sert KO	Wild type	M	30.4286	5	7.127	3
	Sert KO	Wild type	F	30.1429	5	7.12567	2.6
	Sert KO	Wild type	F	26.2857	5	7.09333	2.7
	Sert KO	Wild type	F	26.2857	5	7.11167	2.5
	Sert KO	Wild type	F	26.2857	5	7.098	2.6
	Sert KO	Mutant	M	30.1429	5	7.039	3.3
	Sert KO	Mutant	M	30.1429	5	7.03867	3.1
	Sert KO	Mutant	F	29.4286	5	7.082	2.5
	Sert KO	Mutant	F	29.4286	5	7.02033	3
	Sert KO	Mutant	M	29.4286	5	7.05	3.5
	Sert KO	Mutant	M	26.2857	5	7.08033	3.3
51	Shank2 KO	Wild type	F	30	61	6.90867	3.3
	Shank2 KO	Wild type	F	18.5	61	6.88033	2.6
	Shank2 KO	Wild type	F	9	61	6.85767	3
	Shank2 KO	Wild type	M	18.5	61	6.838	3.2
	Shank2 KO	Wild type	M	9	61	6.89833	3.5
	Shank2 KO	Wild type	M	4	22	6.819	3.3
	Shank2 KO	Mutant	F	30	61	6.988	2.4
	Shank2 KO	Mutant	F	18.5	61	6.89167	2.6
	Shank2 KO	Mutant	F	9	61	6.95167	2.4
	Shank2 KO	Mutant	M	9	61	6.87967	2.9
	Shank2 KO	Mutant	M	4	22	6.95633	2.5
52	Shank3 KO	Wild type	F	17.4286	1	7.14367	2.9
	Shank3 KO	Wild type	M	17.4286	1	7.05933	3.4
	Shank3 KO	Wild type	F	17.1429	1	7.10433	3
	Shank3 KO	Wild type	F	17	1	7.07967	3
	Shank3 KO	Wild type	M	15.8571	1	7.134	3.1
	Shank3 KO	Wild type	M	14.5714	1	7.124	2.9
	Shank3 KO	Wild type	M	11	1	7.08533	3.1
	Shank3 KO	Wild type	F	10.4286	1	7.13767	2.8
	Shank3 KO	Mutant	M	17.4286	1	7.09567	3.2
	Shank3 KO	Mutant	M	17.4286	1	7.11667	3.1
	Shank3 KO	Mutant	M	17.4286	1	7.14433	2.7
	Shank3 KO	Mutant	F	15.8571	1	7.085	3
	Shank3 KO	Mutant	F	14.5714	1	7.121	2.9
	Shank3 KO	Mutant	F	11	1	7.084	3
	Shank3 KO	Mutant	M	11	1	7.06033	3.3
	Shank3 KO	Mutant	M	9.57143	1	7.091	3.1
	Shank3 KO	Mutant	M	9.57143	1	7.11133	3.1
54	Snap25-S187A Tg	Wild type	M	7.71429	2	6.99967	3.3
	Snap25-S187A Tg	Wild type	M	7.71429	2	6.99867	3.4
	Snap25-S187A Tg	Wild type	M	7.71429	2	6.97367	3.4
	Snap25-S187A Tg	Wild type	M	7.71429	2	7.012	3.2
	Snap25-S187A Tg	Wild type	M	7.71429	2	6.995	3
	Snap25-S187A Tg	Wild type	M	7.71429	2	6.98833	3.2
	Snap25-S187A Tg	Wild type	M	7.71429	2	6.972	3.2
	Snap25-S187A Tg	Wild type	M	7.42857	2	6.99167	3.3
	Snap25-S187A Tg	Wild type	M	7.28571	2	7.001	3
	Snap25-S187A Tg	Wild type	M	7.42857	2	6.97533	3.3
	Snap25-S187A Tg	Mutant	M	7.71429	2	6.92967	4
	Snap25-S187A Tg	Mutant	M	7.71429	2	6.96133	3.3
	Snap25-S187A Tg	Mutant	M	7.71429	2	6.90467	3.9
	Snap25-S187A Tg	Mutant	M	7.57143	2	6.90667	4
	Snap25-S187A Tg	Mutant	M	7.71429	2	6.93233	3.8
	Snap25-S187A Tg	Mutant	M	7.71429	2	6.93	3.6
	Snap25-S187A Tg	Mutant	M	7.71429	2	6.95	3.4
	Snap25-S187A Tg	Mutant	M	7.71429	2	6.95267	3.7
	Snap25-S187A Tg	Mutant	M	7.57143	2	6.94667	3.5
	Snap25-S187A Tg	Mutant	M	7.42857	2	6.97867	3.5
55	Stxbp1 KO	Wild type	M	30.5714	2	7.162	3
	Stxbp1 KO	Wild type	M	22.1429	2	7.174	2.8
	Stxbp1 KO	Wild type	M	22.1429	2	7.12167	3.2
	Stxbp1 KO	Wild type	M	16.7143	2	7.11233	3.1
	Stxbp1 KO	Wild type	M	26	2	7.18967	2.5
	Stxbp1 KO	Mutant	M	16.7143	2	7.19067	3
	Stxbp1 KO	Mutant	M	26	2	7.20333	2.6
	Stxbp1 KO	Mutant	M	22.1429	2	7.17567	2.6
	Stxbp1 KO	Mutant	M	30.5714	2	7.158	2.7
	Stxbp1 KO	Mutant	M	16.7143	2	7.15533	3.1
56	Syngap1 KO	Wild type	M	17.7143	2	6.96567	3.8
	Syngap1 KO	Wild type	M	17.7143	2	6.991	3.3
	Syngap1 KO	Wild type	M	17.7143	2	6.97067	3.5
	Syngap1 KO	Wild type	M	17.7143	2	6.996	3.3
	Syngap1 KO	Wild type	M	17	2	7.01667	2.9
	Syngap1 KO	Wild type	M	17	2	7.04167	3.1
	Syngap1 KO	Wild type	M	16.8571	2	7.00467	3.2
	Syngap1 KO	Wild type	M	16.8571	2	6.98567	3.5
	Syngap1 KO	Wild type	M	16.8571	2	7	3.2
	Syngap1 KO	Wild type	M	16.8571	2	7.054	2.9
	Syngap1 KO	Mutant	M	17.7143	2	6.987	3.2
	Syngap1 KO	Mutant	M	17.7143	2	6.96567	3.7
	Syngap1 KO	Mutant	M	17.7143	2	7.046	3.3
	Syngap1 KO	Mutant	M	17.7143	2	6.98633	3.5
	Syngap1 KO	Mutant	M	17	2	7.01833	3.1
	Syngap1 KO	Mutant	M	17	2	6.96867	3.4
	Syngap1 KO	Mutant	M	16.8571	2	6.95967	3.6
	Syngap1 KO	Mutant	M	16.8571	2	6.98133	3.8
	Syngap1 KO	Mutant	M	16.8571	2	7.01567	2.9
	Syngap1 KO	Mutant	M	16.8571	2	6.98233	3.6
57	Streptozotocin treatment and/or restraint stress_1st	Control	M	16.2143	14	7.09033	2.9	Mice received a single intraperitoneal injection of streptozotocin (STZ, 200 mg/kg) and, four weeks after that, chronic restraint stress (CRS, 6 hr/day) for 3 weeks.
	Streptozotocin treatment and/or restraint stress_1st	Control	M	16.2143	14	7.03067	3.2
	Streptozotocin treatment and/or restraint stress_1st	Control	M	16.2143	14	7.09867	2.8
	Streptozotocin treatment and/or restraint stress_1st	Control	M	16.2143	14	7.05133	2.9
	Streptozotocin treatment and/or restraint stress_1st	Control	M	16.2143	14	7.04367	3.1
	Streptozotocin treatment and/or restraint stress_1st	Restraint stress	M	16.2143	14	6.97667	3.2
	Streptozotocin treatment and/or restraint stress_1st	Restraint stress	M	16.2143	14	7.046	3.1
	Streptozotocin treatment and/or restraint stress_1st	Restraint stress	M	16.2143	14	7.00733	3.4
	Streptozotocin treatment and/or restraint stress_1st	Restraint stress	M	16.2143	14	7.011	3.2
	Streptozotocin treatment and/or restraint stress_1st	Restraint stress	M	16.2143	14	7.07333	2.9
	Streptozotocin treatment and/or restraint stress_1st	Restraint stress	M	16.2143	14	7.10233	2.8
	Streptozotocin treatment and/or restraint stress_1st	Restraint stress	M	16.2143	14	6.962	3.2
	Streptozotocin treatment and/or restraint stress_1st	Streptozotocin treatment	M	16.2143	14	6.93233	4.8
	Streptozotocin treatment and/or restraint stress_1st	Streptozotocin treatment	M	16.2143	14	6.92733	5
	Streptozotocin treatment and/or restraint stress_1st	Streptozotocin treatment	M	16.2143	14	6.93733	4.1
	Streptozotocin treatment and/or restraint stress_1st	Streptozotocin treatment	M	16.2143	14	6.89933	4.6
	Streptozotocin treatment and/or restraint stress_1st	Streptozotocin treatment	M	16.2143	14	6.92133	4.4
	Streptozotocin treatment and/or restraint stress_1st	Streptozotocin treatment	M	16.2143	14	6.95333	4.5
	Streptozotocin treatment and/or restraint stress_1st	Streptozotocin treatment	M	16.2143	14	6.96033	4.3
	Streptozotocin treatment and/or restraint stress_1st	Streptozotocin treatment	M	16.2143	14	6.91767	4.6
	Streptozotocin treatment and/or restraint stress_1st	Streptozotocin treatment + restraint stress	M	16.2143	14	6.87767	4.4
	Streptozotocin treatment and/or restraint stress_1st	Streptozotocin treatment + restraint stress	M	16.2143	14	6.94667	4.2
	Streptozotocin treatment and/or restraint stress_1st	Streptozotocin treatment + restraint stress	M	16.2143	14	6.88467	5.8
	Streptozotocin treatment and/or restraint stress_1st	Streptozotocin treatment + restraint stress	M	16.2143	14	6.974	4.1
	Streptozotocin treatment and/or restraint stress_1st	Streptozotocin treatment + restraint stress	M	16.2143	14	6.906	4.7
	Streptozotocin treatment and/or restraint stress_1st	Streptozotocin treatment + restraint stress	M	16.2143	14	6.95133	4
	Streptozotocin treatment and/or restraint stress_1st	Streptozotocin treatment + restraint stress	M	16.2143	14	6.912	4.8
	Streptozotocin treatment and/or restraint stress_1st	Streptozotocin treatment + restraint stress	M	16.2143	14	6.94333	4.2
	Streptozotocin treatment and/or restraint stress_1st	Streptozotocin treatment + restraint stress	M	16.2143	14	6.888	4.6
	Streptozotocin treatment and/or restraint stress_2nd	Control	M	16.2143	27	6.86733	2.9
	Streptozotocin treatment and/or restraint stress_2nd	Control	M	16.2143	27	6.91667	3
	Streptozotocin treatment and/or restraint stress_2nd	Control	M	16.2143	27	6.82433	2.9
	Streptozotocin treatment and/or restraint stress_2nd	Control	M	16.2143	27	6.95567	2.8
	Streptozotocin treatment and/or restraint stress_2nd	Control	M	16.2143	27	6.86867	3.1
	Streptozotocin treatment and/or restraint stress_2nd	Control	M	16.2143	27	6.861	2.5
	Streptozotocin treatment and/or restraint stress_2nd	Control	M	16.2143	27	6.88433	3.2
	Streptozotocin treatment and/or restraint stress_2nd	Control	M	16.2143	27	6.90467	3.1
	Streptozotocin treatment and/or restraint stress_2nd	Control	M	16.2143	27	6.91567	3.1
	Streptozotocin treatment and/or restraint stress_2nd	Control	M	16.2143	27	6.90767	3.2
	Streptozotocin treatment and/or restraint stress_2nd	Control	M	16.2143	27	6.91733	3.1
	Streptozotocin treatment and/or restraint stress_2nd	Control	M	16.2143	27	6.85867	3.1
	Streptozotocin treatment and/or restraint stress_2nd	Restraint stress	M	16.2143	27	6.85867	3.3
	Streptozotocin treatment and/or restraint stress_2nd	Restraint stress	M	16.2143	27	6.904	2.8
	Streptozotocin treatment and/or restraint stress_2nd	Restraint stress	M	16.2143	27	6.939	2.8
	Streptozotocin treatment and/or restraint stress_2nd	Restraint stress	M	16.2143	27	6.874	2.9
	Streptozotocin treatment and/or restraint stress_2nd	Restraint stress	M	16.2143	27	6.90233	2.8
	Streptozotocin treatment and/or restraint stress_2nd	Restraint stress	M	16.2143	27	6.89733	3.1
	Streptozotocin treatment and/or restraint stress_2nd	Restraint stress	M	16.2143	27	6.83933	2.9
	Streptozotocin treatment and/or restraint stress_2nd	Restraint stress	M	16.2143	27	6.87067	3.3
	Streptozotocin treatment and/or restraint stress_2nd	Restraint stress	M	16.2143	27	6.85867	2.9
	Streptozotocin treatment and/or restraint stress_2nd	Restraint stress	M	16.2143	27	6.851	2.6
	Streptozotocin treatment and/or restraint stress_2nd	Restraint stress	M	16.2143	27	6.85767	3.5
	Streptozotocin treatment and/or restraint stress_2nd	Streptozotocin treatment	M	16.2143	27	6.85233	3.9
	Streptozotocin treatment and/or restraint stress_2nd	Streptozotocin treatment	M	16.2143	27	6.81333	3.7
	Streptozotocin treatment and/or restraint stress_2nd	Streptozotocin treatment	M	16.2143	27	6.81967	4.1
	Streptozotocin treatment and/or restraint stress_2nd	Streptozotocin treatment	M	16.2143	27	6.79033	4.4
	Streptozotocin treatment and/or restraint stress_2nd	Streptozotocin treatment	M	16.2143	27	6.75833	4.1
	Streptozotocin treatment and/or restraint stress_2nd	Streptozotocin treatment	M	16.2143	27	6.82133	4.4
	Streptozotocin treatment and/or restraint stress_2nd	Streptozotocin treatment	M	16.2143	27	6.798	4.1
	Streptozotocin treatment and/or restraint stress_2nd	Streptozotocin treatment	M	16.2143	27	6.76133	4.2
	Streptozotocin treatment and/or restraint stress_2nd	Streptozotocin treatment	M	16.2143	27	6.686	4.8
	Streptozotocin treatment and/or restraint stress_2nd	Streptozotocin treatment	M	16.2143	27	6.71467	5
	Streptozotocin treatment and/or restraint stress_2nd	Streptozotocin treatment	M	16.2143	27	6.74567	4.2
	Streptozotocin treatment and/or restraint stress_2nd	Streptozotocin treatment	M	16.2143	27	6.77233	4.2
	Streptozotocin treatment and/or restraint stress_2nd	Streptozotocin treatment	M	16.2143	27	6.80233	4.3
	Streptozotocin treatment and/or restraint stress_2nd	Streptozotocin treatment	M	16.2143	27	6.73667	4.3
	Streptozotocin treatment and/or restraint stress_2nd	Streptozotocin treatment	M	16.2143	27	6.73633	4.4
	Streptozotocin treatment and/or restraint stress_2nd	Streptozotocin treatment + restraint stress	M	16.2143	27	6.76067	3.9
	Streptozotocin treatment and/or restraint stress_2nd	Streptozotocin treatment + restraint stress	M	16.2143	27	6.79033	3.6
	Streptozotocin treatment and/or restraint stress_2nd	Streptozotocin treatment + restraint stress	M	16.2143	27	6.85133	3.4
	Streptozotocin treatment and/or restraint stress_2nd	Streptozotocin treatment + restraint stress	M	16.2143	27	6.81333	3.7
	Streptozotocin treatment and/or restraint stress_2nd	Streptozotocin treatment + restraint stress	M	16.2143	27	6.79767	4.2
	Streptozotocin treatment and/or restraint stress_2nd	Streptozotocin treatment + restraint stress	M	16.2143	27	6.72	4.3
	Streptozotocin treatment and/or restraint stress_2nd	Streptozotocin treatment + restraint stress	M	16.2143	27	6.70567	4.7
	Streptozotocin treatment and/or restraint stress_2nd	Streptozotocin treatment + restraint stress	M	16.2143	27	6.80567	4.4
	Streptozotocin treatment and/or restraint stress_2nd	Streptozotocin treatment + restraint stress	M	16.2143	27	6.73267	4.6
	Streptozotocin treatment and/or restraint stress_2nd	Streptozotocin treatment + restraint stress	M	16.2143	27	6.85733	3.9
	Streptozotocin treatment and/or restraint stress_2nd	Streptozotocin treatment + restraint stress	M	16.2143	27	6.76667	4.4
	Streptozotocin treatment and/or restraint stress_2nd	Streptozotocin treatment + restraint stress	M	16.2143	27	6.75567	4.4
	Streptozotocin treatment and/or restraint stress_2nd	Streptozotocin treatment + restraint stress	M	16.2143	27	6.749	4.2
58	Thalidomide treatment	Control	F	7	33	6.92667	3.2	Pregnant Wistar rats received orally 500 mg/kg thalidomide on days 9 and 10 after conception. Control rats received vehicle (distilled water containing 5% gum arabic).
	Thalidomide treatment	Control	F	7	33	6.92167	3.3
	Thalidomide treatment	Control	F	7	33	6.96167	2.9
	Thalidomide treatment	Control	F	7	33	6.952	3.4
	Thalidomide treatment	Control	F	7	26	6.928	3.4
	Thalidomide treatment	Control	F	7	26	6.938	3.2
	Thalidomide treatment	Control	M	7	33	6.929	3.2
	Thalidomide treatment	Control	M	7	33	6.946	3.2
	Thalidomide treatment	Control	M	7	33	6.946	3.2
	Thalidomide treatment	Control	M	7	33	6.97167	3.1
	Thalidomide treatment	Control	M	7	33	6.91567	3.1
	Thalidomide treatment	Control	M	7	33	6.94667	2.9
	Thalidomide treatment	Control	M	7	26	6.936	3.3
	Thalidomide treatment	Control	M	7	26	6.929	3.4
	Thalidomide treatment	Control	M	7	26	6.93433	3.4
	Thalidomide treatment	Control	M	7	26	6.94433	3.3
	Thalidomide treatment	Control	M	7	26	6.92267	3
	Thalidomide treatment	Control	M	7	26	6.88833	3.7
	Thalidomide treatment	Control	M	7	26	6.91667	3.7
	Thalidomide treatment	Thalidomide	F	7	33	6.98133	3.1
	Thalidomide treatment	Thalidomide	F	7	33	6.91933	3.4
	Thalidomide treatment	Thalidomide	F	7	33	6.93467	3.2
	Thalidomide treatment	Thalidomide	F	7	33	6.94433	3.2
	Thalidomide treatment	Thalidomide	F	7	26	6.944	3.3
	Thalidomide treatment	Thalidomide	F	7	26	6.967	2.9
	Thalidomide treatment	Thalidomide	F	7	26	6.89467	3.3
	Thalidomide treatment	Thalidomide	F	7	26	6.95667	3.1
	Thalidomide treatment	Thalidomide	M	7	33	6.976	3.4
	Thalidomide treatment	Thalidomide	M	7	33	6.94333	3.5
	Thalidomide treatment	Thalidomide	M	7	33	6.91567	3.6
	Thalidomide treatment	Thalidomide	M	7	33	6.948	3.5
	Thalidomide treatment	Thalidomide	M	7	33	6.93267	3.4
	Thalidomide treatment	Thalidomide	M	7	33	6.90867	3.6
	Thalidomide treatment	Thalidomide	M	7	26	6.90467	3.5
	Thalidomide treatment	Thalidomide	M	7	26	6.93367	3.6
	Thalidomide treatment	Thalidomide	M	7	26	6.952	2.8
	Thalidomide treatment	Thalidomide	M	7	26	6.91167	3.5
	Thalidomide treatment	Thalidomide	M	7	26	6.89567	3.7
	Thalidomide treatment	Thalidomide	M	7	26	6.96567	3.2
59	Tnxb KO_1st	Wild type	M	8.85714	48	6.852	5.2
	Tnxb KO_1st	Wild type	M	8.85714	48	6.85767	5
	Tnxb KO_1st	Wild type	M	8.85714	48	6.87	4.9
	Tnxb KO_1st	Wild type	M	9.14286	35	6.95567	3.7
	Tnxb KO_1st	Wild type	F	8.85714	48	6.97867	3.8
	Tnxb KO_1st	Wild type	F	8.85714	48	6.93133	4.2
	Tnxb KO_1st	Mutant	M	8.85714	48	6.958	4
	Tnxb KO_1st	Mutant	M	9.14286	35	6.94633	3.7
	Tnxb KO_1st	Mutant	M	8	35	6.94267	3.8
	Tnxb KO_1st	Mutant	M	8	35	6.96467	3.6
	Tnxb KO_1st	Mutant	M	8	35	6.954	3.6
	Tnxb KO_1st	Mutant	F	8.85714	48	6.92267	4.2
	Tnxb KO_1st	Mutant	F	8.85714	48	6.91	4.6
	Tnxb KO_1st	Mutant	F	8	35	6.997	3.5
	Tnxb KO_1st	Mutant	F	8	35	7.01533	3.2
	Tnxb KO_2nd	Wild type	M	8.28571	34	6.92667	4.2
	Tnxb KO_2nd	Wild type	M	8.28571	34	6.95967	3.9
	Tnxb KO_2nd	Wild type	M	8.42857	26	6.99867	3.6
	Tnxb KO_2nd	Wild type	F	8.28571	48	6.96033	3.4
	Tnxb KO_2nd	Wild type	F	8.28571	48	7.02167	3.6
	Tnxb KO_2nd	Mutant	M	8.28571	48	7.00833	3.7
	Tnxb KO_2nd	Mutant	M	8.28571	48	6.99067	3.9
	Tnxb KO_2nd	Mutant	M	8.28571	48	6.97333	3.7
	Tnxb KO_2nd	Mutant	M	8.28571	48	6.977	3.7
	Tnxb KO_2nd	Mutant	M	8.42857	26	6.99967	3.7
	Tnxb KO_2nd	Mutant	F	8.28571	48	7.00267	3.4
	Tnxb KO_2nd	Mutant	F	8.28571	48	6.99067	3.4
60	Trx1 KO	Wild type	F	3.85714	45	7.077	2.7
	Trx1 KO	Wild type	M	3.85714	45	7.00133	3.5
	Trx1 KO	Wild type	M	3.85714	45	6.98267	3.2
	Trx1 KO	Wild type	M	3.85714	45	7.02167	2.7
	Trx1 KO	Wild type	F	4.14286	25	7.03267	2.9
	Trx1 KO	Mutant	M	3.85714	45	7.07867	2.5
	Trx1 KO	Mutant	F	4.14286	25	7.06733	3.3
	Trx1 KO	Mutant	F	4.14286	25	7.03633	3.1
	Trx1 KO	Mutant	F	4.14286	25	6.96767	3.4
	Trx1 KO	Mutant	M	4.14286	25	6.99933	3.2
61	Tsc1 KO_11w_1st	Wild type	M	11.7143	72	6.87133	2.9
	Tsc1 KO_11w_1st	Wild type	M	11.7143	72	6.816	3.1
	Tsc1 KO_11w_1st	Wild type	M	11.7143	72	6.88033	3.2
	Tsc1 KO_11w_1st	Wild type	M	11.7143	72	6.82467	3.4
	Tsc1 KO_11w_1st	Wild type	M	11.7143	65	6.86067	3.4
	Tsc1 KO_11w_1st	Wild type	M	11.7143	65	6.93467	2.6
	Tsc1 KO_11w_1st	Mutant	M	11.5714	79	6.85467	3.3
	Tsc1 KO_11w_1st	Mutant	M	11.5714	79	6.76633	3.5
	Tsc1 KO_11w_1st	Mutant	M	11.7143	72	6.81233	3.4
	Tsc1 KO_11w_1st	Mutant	M	11.7143	65	6.81967	3.3
	Tsc1 KO_11w_1st	Mutant	M	11.7143	65	6.831	3.4
	Tsc1 KO_11w_1st	Mutant	M	11.7143	65	6.856	3.3
	Tsc1 KO_11w_2nd	Wild type	M	11.4286	73	7.05167	3.2
	Tsc1 KO_11w_2nd	Wild type	M	11.4286	73	7.078	3
	Tsc1 KO_11w_2nd	Wild type	M	11.2857	66	7.05967	3.4
	Tsc1 KO_11w_2nd	Wild type	M	11.2857	66	7.09667	3.4
	Tsc1 KO_11w_2nd	Mutant	M	11.4286	73	6.883	3.7
	Tsc1 KO_11w_2nd	Mutant	M	11.4286	73	6.88033	3.5
	Tsc1 KO_11w_2nd	Mutant	M	11.2857	66	6.92033	4.5
	Tsc1 KO_11w_2nd	Mutant	M	11.2857	66	6.97267	4
	Tsc1 KO_18w	Wild type	M	18.4286	66	7.062	3.1
	Tsc1 KO_18w	Wild type	M	18.7143	59	7.07667	2.9
	Tsc1 KO_18w	Wild type	M	18.7143	59	6.994	3.8
	Tsc1 KO_18w	Wild type	M	18.7143	59	7.09633	2.8
	Tsc1 KO_18w	Wild type	M	18.7143	52	6.98733	4.1
	Tsc1 KO_18w	Wild type	M	18.7143	52	7.04	3.5
	Tsc1 KO_18w	Wild type	M	18.1429	45	7.06333	3.1
	Tsc1 KO_18w	Wild type	M	18.1429	45	6.98033	3.6
	Tsc1 KO_18w	Wild type	M	18	45	6.972	3.8
	Tsc1 KO_18w	Wild type	M	18.8571	31	7.06533	3
	Tsc1 KO_18w	Wild type	M	18.8571	31	7.077	2.9
	Tsc1 KO_18w	Mutant	M	18.4286	66	6.99033	3.6
	Tsc1 KO_18w	Mutant	M	18.4286	66	6.96633	3.7
	Tsc1 KO_18w	Mutant	M	18.8571	52	6.97	3.4
	Tsc1 KO_18w	Mutant	M	18.8571	52	6.97067	3.9
	Tsc1 KO_18w	Mutant	M	18.7143	52	6.882	4.5
	Tsc1 KO_18w	Mutant	M	18.7143	52	6.97233	3.5
	Tsc1 KO_18w	Mutant	M	18.7143	52	6.95333	3.5
	Tsc1 KO_18w	Mutant	M	18.7143	52	6.95167	3.9
	Tsc1 KO_18w	Mutant	M	18	45	6.94967	3.6
	Tsc1 KO_18w	Mutant	M	18.8571	31	6.964	3.5
62	Valproic acid treatment	Control	F	5	126	6.98333	3.3	Pregnant female C57BL/6 J mice received a single subcutaneous injection of 600 mg/kg sodium valproate on day 12.5 after conception. Control mice received saline.
	Valproic acid treatment	Control	F	5	126	7.00933	3.2
	Valproic acid treatment	Control	F	5	126	7.01433	3.3
	Valproic acid treatment	Control	F	5	126	6.98133	3.5
	Valproic acid treatment	Control	F	5	56	6.99	3.4
	Valproic acid treatment	Control	F	5	56	7.02567	3
	Valproic acid treatment	Control	F	5	56	6.98333	3.1
	Valproic acid treatment	Control	M	5	126	7.018	3.5
	Valproic acid treatment	Control	M	5	126	7.01333	3.4
	Valproic acid treatment	Control	M	5	126	6.99367	3.4
	Valproic acid treatment	Control	M	5	126	6.98767	3.4
	Valproic acid treatment	Control	M	5.14286	55	6.992	3
	Valproic acid treatment	Control	M	5.14286	55	6.94533	3.5
	Valproic acid treatment	Control	M	5.14286	55	6.91633	3.6
	Valproic acid treatment	Valproic acid	F	5.14286	125	6.987	3.3
	Valproic acid treatment	Valproic acid	F	5.14286	125	6.93733	3.3
	Valproic acid treatment	Valproic acid	F	5.14286	125	6.97033	3.3
	Valproic acid treatment	Valproic acid	F	5.14286	125	6.98833	3.3
	Valproic acid treatment	Valproic acid	F	5.14286	125	6.95633	3.3
	Valproic acid treatment	Valproic acid	F	5	56	6.98467	3.2
	Valproic acid treatment	Valproic acid	M	5.14286	55	6.97267	3.2
	Valproic acid treatment	Valproic acid	M	5.14286	125	6.86967	3.3
	Valproic acid treatment	Valproic acid	M	5.14286	125	7.012	3.2
	Valproic acid treatment	Valproic acid	M	5	56	6.958	3.5
	Valproic acid treatment	Valproic acid	M	5.14286	55	6.94467	3.3
	Valproic acid treatment	Valproic acid	M	5.14286	55	6.93633	3.6
	Valproic acid treatment	Valproic acid	M	5.14286	55	6.92767	3.3
	Valproic acid treatment	Valproic acid	M	5.14286	55	6.92	3.5
66	Sleep disturbance	Control	M	9.71429	49	6.975	3.1
	Sleep disturbance	Control	M	9.71429	49	6.96933	3.2
	Sleep disturbance	Control	M	9.71429	49	6.972	3
	Sleep disturbance	Control	M	9.71429	49	6.95033	3.3
	Sleep disturbance	Control	M	9.71429	49	6.95967	3.2
	Sleep disturbance	Control	M	9.71429	49	6.95633	3.4
	Sleep disturbance	Control	M	9.71429	49	6.96433	3.3
	Sleep disturbance	Sleep disturbance	M	10.7143	49	6.93767	3.5
	Sleep disturbance	Sleep disturbance	M	10.7143	49	6.94167	3.5
	Sleep disturbance	Sleep disturbance	M	10.7143	49	6.94333	3.6
	Sleep disturbance	Sleep disturbance	M	10.7143	49	6.95667	3.5
	Sleep disturbance	Sleep disturbance	M	10.7143	49	6.93533	3.3
	Sleep disturbance	Sleep disturbance	M	10.7143	49	6.96633	3.3
	Sleep disturbance	Sleep disturbance	M	10.7143	49	6.93733	3.5
	Sleep disturbance	Sleep disturbance	M	10.7143	49	6.94433	3.5
	Sleep disturbance	Sleep disturbance	M	10.7143	49	6.95633	3.3
	Sleep disturbance	Sleep disturbance	M	10.7143	49	6.95367	3.2
	Sleep disturbance	Sleep disturbance	M	10.7143	49	6.93	3.5
	Sleep disturbance	Sleep disturbance	M	10.7143	49	6.93133	3.6
	Sleep disturbance	Sleep disturbance	M	10.7143	49	6.934	3.4
67	hMfn2	Control	M	51	6	6.94633	3.3
	hMfn2	Control	M	50.2857	6	6.91433	3.6
	hMfn2	Control	M	50.2857	6	6.93267	3.5
	hMfn2	Mutant	M	50.2857	6	6.872	4.3
	hMfn2	Mutant	M	50.2857	6	6.90433	4.5
	hMfn2	Mutant	M	50.2857	6	6.91	4.4
	hMfn2	Mutant	M	50.2857	6	6.87333	4.6
68	Picrotoxin_1st	Control	M	10	313	6.93667	3.6
	Picrotoxin_1st	Control	M	10.1429	228	6.995	3.4
	Picrotoxin_1st	Control	M	10.1429	228	6.988	3.5
	Picrotoxin_1st	Control	M	10.1429	228	6.969	3.5
	Picrotoxin_1st	Control	M	10.1429	228	6.959	3.5
	Picrotoxin_1st	Control	M	10.4286	114	7.019	3.3
	Picrotoxin_1st	Control	M	10.1429	67	6.94467	3.7
	Picrotoxin_1st	Control	F	10	313	6.97267	3.5
	Picrotoxin_1st	Control	F	10.2857	227	6.992	3.2
	Picrotoxin_1st	Control	F	10	117	6.97267	3.3
	Picrotoxin_1st	Control	F	10.1429	116	6.98333	3.5
	Picrotoxin_1st	Control	F	10.1429	116	7.00233	3.3
	Picrotoxin_1st	Control	F	10	68	6.97033	3.4
	Picrotoxin_1st	Control	F	10	68	6.94367	3.5
	Picrotoxin_1st	Picrotoxin	M	10.1429	291	6.961	3.5
	Picrotoxin_1st	Picrotoxin	M	10.1429	291	6.95333	3.5
	Picrotoxin_1st	Picrotoxin	M	10.1429	228	6.95933	3.4
	Picrotoxin_1st	Picrotoxin	M	10.1429	228	6.946	3.5
	Picrotoxin_1st	Picrotoxin	M	10.4286	114	6.94667	3.7
	Picrotoxin_1st	Picrotoxin	M	10.2857	115	6.918	3.8
	Picrotoxin_1st	Picrotoxin	M	10.1429	67	6.962	3.4
	Picrotoxin_1st	Picrotoxin	F	10.1429	291	6.92767	3.7
	Picrotoxin_1st	Picrotoxin	F	10.1429	291	6.93233	3.6
	Picrotoxin_1st	Picrotoxin	F	10.2857	227	6.943	3.4
	Picrotoxin_1st	Picrotoxin	F	10	117	6.95367	3.5
	Picrotoxin_1st	Picrotoxin	F	10	117	6.88	4
	Picrotoxin_1st	Picrotoxin	F	10.1429	116	6.96133	3.6
	Picrotoxin_1st	Picrotoxin	F	10	68	6.95233	3.5
	Picrotoxin_2nd	Control	M	10	327	6.94233	3.5
	Picrotoxin_2nd	Control	M	10	129	6.98467	3.4
	Picrotoxin_2nd	Control	M	10	129	6.99067	3.2
	Picrotoxin_2nd	Control	M	10	128	6.99467	3.2
	Picrotoxin_2nd	Control	M	10	81	6.97233	3.3
	Picrotoxin_2nd	Control	M	10	81	6.96567	3.4
	Picrotoxin_2nd	Control	F	10	131	6.94567	3.4
	Picrotoxin_2nd	Control	F	10	131	6.943	3.2
	Picrotoxin_2nd	Control	F	10	242	6.96	3.2
	Picrotoxin_2nd	Control	F	10	242	6.96433	3.2
	Picrotoxin_2nd	Control	F	10	131	6.97233	3.1
	Picrotoxin_2nd	Control	F	10	81	6.98167	3.2
	Picrotoxin_2nd	Control	F	10	327	6.94433	3.3
	Picrotoxin_2nd	Picrotoxin	M	10	129	7.005	3.2
	Picrotoxin_2nd	Picrotoxin	M	10	129	6.98567	3.3
	Picrotoxin_2nd	Picrotoxin	M	10	305	6.95	3.5
	Picrotoxin_2nd	Picrotoxin	M	10	128	6.991	3.2
	Picrotoxin_2nd	Picrotoxin	M	10	305	6.968	3.3
	Picrotoxin_2nd	Picrotoxin	M	10	128	6.95933	3.3
	Picrotoxin_2nd	Picrotoxin	F	10	305	6.97067	3.3
	Picrotoxin_2nd	Picrotoxin	F	10	305	6.94367	3.4
	Picrotoxin_2nd	Picrotoxin	F	10	241	6.93833	3.3
	Picrotoxin_2nd	Picrotoxin	F	10	241	6.98033	3.1
	Picrotoxin_2nd	Picrotoxin	F	10	305	6.95767	3.2
	Picrotoxin_2nd	Picrotoxin	F	10	241	6.97067	3.2
	Picrotoxin_2nd	Picrotoxin	F	10	131	6.94167	3.5
69	Chick separation stress	Control	M	5d	5	6.968	3.5
	Chick separation stress	Control	M	5d	5	6.90167	4
	Chick separation stress	Control	M	5d	5	6.881	4.3
	Chick separation stress	Control	M	5d	5	6.85367	4.4
	Chick separation stress	Control	M	5d	5	6.849	4.3
	Chick separation stress	Control	M	5d	5	6.895	4.2
	Chick separation stress	Control	M	5d	5	6.89	3.9
	Chick separation stress	Control	M	5d	5	6.84567	4.6
	Chick separation stress	Separation	M	5d	5	6.876	4.2
	Chick separation stress	Separation	M	5d	5	6.81467	4.9
	Chick separation stress	Separation	M	5d	5	6.83033	4.6
	Chick separation stress	Separation	M	5d	5	6.86	4.3
	Chick separation stress	Separation	M	5d	5	6.892	4.2
	Chick separation stress	Separation	M	5d	5	6.83067	4.3
	Chick separation stress	Separation	M	5d	5	6.77133	5.6
	Chick separation stress	Separation	M	5d	5	6.86567	4.4
70	B2m KO	Wild type	M	53.7143	860	6.95967	2.9
	B2m KO	Wild type	M	53.7143	860	6.97567	3.1
	B2m KO	Wild type	M	53.7143	860	6.96267	3
	B2m KO	Wild type	M	53.7143	860	7.00367	3
	B2m KO	Wild type	M	53.7143	860	6.98833	2.9
	B2m KO	Wild type	M	53.7143	860	6.98067	3
	B2m KO	Wild type	M	53.7143	860	6.95367	3
	B2m KO	Wild type	M	53.7143	860	6.94867	3.1
	B2m KO	Wild type	M	53.7143	860	6.97333	3
	B2m KO	Wild type	M	52.8571	860	6.97667	2.8
	B2m KO	Mutant	M	53.7143	860	6.96767	2.9
	B2m KO	Mutant	M	53.7143	860	6.946	2.9
	B2m KO	Mutant	M	53.7143	860	6.97467	3.4
	B2m KO	Mutant	M	53.7143	860	6.95133	2.8
	B2m KO	Mutant	M	53.7143	860	6.98467	2.8
	B2m KO	Mutant	M	53.7143	860	6.991	2.9
	B2m KO	Mutant	M	53.7143	860	6.996	2.8
	B2m KO	Mutant	M	53.7143	860	6.981	2.6
	B2m KO	Mutant	M	53.7143	860	7.008	3
	B2m KO	Mutant	M	52.8571	860	6.97533	2.8
71	fPrrt3	Wild type	M			6.987	3.5
	fPrrt3	Wild type	M			6.98167	3.4
	fPrrt3	Wild type	M			6.99567	3.2
	fPrrt3	Wild type	M			6.95767	3.1
	fPrrt3	Wild type	M			6.981	3.3
	fPrrt3	Wild type	M			6.952	3.4
	fPrrt3	Wild type	M			6.985	2.9
	fPrrt3	Wild type	M			6.984	3.3
	fPrrt3	Wild type	M			6.965	3.1
	fPrrt3	Wild type	M			6.979	3.2
	fPrrt3	Mutant	M			7.01	3
	fPrrt3	Mutant	M			6.96067	3.4
	fPrrt3	Mutant	M			6.957	3.2
	fPrrt3	Mutant	M			6.976	3.3
	fPrrt3	Mutant	M			6.98933	3.1
	fPrrt3	Mutant	M			6.97433	3.3
	fPrrt3	Mutant	M			6.96733	3.1
	fPrrt3	Mutant	M			6.957	3.3
	fPrrt3	Mutant	M			6.95967	3
	fPrrt3	Mutant	M			6.97067	3.2
72	Zeb2	Control	M	13.8571	89	7.02633	3.1
	Zeb2	Control	M	13.2857	89	6.96367	3.4
	Zeb2	Control	M	13.2857	89	6.98167	3.2
	Zeb2	Control	M	13.2857	89	6.954	3.5
	Zeb2	Control	M	12.7143	77	7.002	3.2
	Zeb2	Control	M	13	77	6.97	3.4
	Zeb2	Control	M	13.7143	64	6.98567	3.1
	Zeb2	Control	M	13.8571	64	6.976	3.1
	Zeb2	Control	M	13.8571	64	6.972	3.5
	Zeb2	Mutant	M	13.8571	89	6.95967	3.6
	Zeb2	Mutant	M	13.8571	89	6.96733	3.5
	Zeb2	Mutant	M	13.8571	89	6.96933	3.6
	Zeb2	Mutant	M	13.2857	89	7.007	3.3
	Zeb2	Mutant	M	12.7143	77	6.95067	3.4
	Zeb2	Mutant	M	13	77	7.028	3.3
	Zeb2	Mutant	M	13.7143	64	6.93467	3.5
	Zeb2	Mutant	M	13.8571	64	7.012	3.5
	Zeb2	Mutant	M	13.8571	64	6.97	3.4
73	Tsc2	Wild type	M	13.2857	202	6.91433	3.3
	Tsc2	Wild type	M	13.2857	202	6.948	3
	Tsc2	Wild type	M	18.7143	104	7.00933	3.1
	Tsc2	Wild type	M	18.4286	69	6.97167	3.1
	Tsc2	Wild type	M	18.4286	69	7.015	2.7
	Tsc2	Wild type	M	18.4286	69	6.95467	3
	Tsc2	Wild type	M	17.8571	62	6.977	2.9
	Tsc2	Wild type	M	17.8571	62	6.99167	2.8
	Tsc2	Mutant	M	13.2857	202	6.93433	2.9
	Tsc2	Mutant	M	18.7143	104	6.96567	3.1
	Tsc2	Mutant	M	18.4286	69	6.97267	3.2
	Tsc2	Mutant	M	18.4286	69	6.968	3.1
	Tsc2	Mutant	M	18.4286	69	6.994	2.8
	Tsc2	Mutant	M	18.4286	69	6.976	3
	Tsc2	Mutant	M	17.8571	62	6.997	3
	Tsc2	Mutant	M	17.8571	62	6.966	2.8
74	Aldh	Wild type	M	119.571	1328	6.97433	2.4
	Aldh	Wild type	M	119.714	1328	7.082	1.8
	Aldh	Wild type	M	119.857	1328	6.97467	2.9
	Aldh	Wild type	M	117.714	1328	6.94067	3.4
	Aldh	Wild type	M	119.857	1328	6.99	2.8
	Aldh	Wild type	M	117.286	1328	6.96633	2.9
	Aldh	Wild type	M	118.286	1328	6.927	3.2
	Aldh	Wild type	M	119.714	1328	6.946	2.7
	Aldh	Wild type	M	119.571	1328	6.95567	2.8
	Aldh	Wild type	M	118.143	1328	6.93833	2.8
	Aldh	Wild type	M	117.714	1328	6.92333	3
	Aldh	Mutant	M	119.714	1328	6.977	2.9
	Aldh	Mutant	M	119.571	1328	7.06533	2
	Aldh	Mutant	M	119.714	1328	6.94033	2.9
	Aldh	Mutant	M	119.714	1328	6.98733	2.3
	Aldh	Mutant	M	118.143	1328	6.908	3.1
	Aldh	Mutant	M	119.857	1328	6.92667	2.8
	Aldh	Mutant	M	120.429	1328	6.97433	3
75	Nex-PolB	Control	M	34.2857	1077	6.98667	3
	Nex-PolB	Control	M	41.4286	1077	7.01567	3.1
	Nex-PolB	Control	M	41.4286	1077	6.98967	3.2
	Nex-PolB	Control	M	41.1429	1077	6.98167	2.8
	Nex-PolB	Control	M	39.8571	1077	6.988	2.9
	Nex-PolB	Control	M	38.2857	1077	6.99267	3
	Nex-PolB	Control	M	36.2857	1077	6.95933	3
	Nex-PolB	Control	M	36.2857	1077	7.02	3.2
	Nex-PolB	Control	M	34.7143	1077	7.00167	3.1
	Nex-PolB	Mutant	M	34.2857	1077	6.97033	3.3
	Nex-PolB	Mutant	M	41.4286	1077	6.98533	3
	Nex-PolB	Mutant	M	41.4286	1077	6.982	2.9
	Nex-PolB	Mutant	M	41.1429	1077	6.99	3.1
	Nex-PolB	Mutant	M	39.8571	1077	6.978	3
	Nex-PolB	Mutant	M	38.2857	1077	6.99	3.1
	Nex-PolB	Mutant	M	38	1077	6.98667	3.1
	Nex-PolB	Mutant	M	36.2857	1077	6.98867	2.9
	Nex-PolB	Mutant	M	36.2857	1077	6.94333	3.3
	Nex-PolB	Mutant	M	34.7143	1077	7.01733	3.2
76	TRPM2	Wild type	M	82.7143	3962	6.99233	3.2
	TRPM2	Wild type	M	82.7143	3962	6.95733	3.3
	TRPM2	Wild type	M	82.7143	3962	6.96067	3
	TRPM2	Wild type	M	82.7143	3962	7.00133	3
	TRPM2	Wild type	M	82.7143	3962	6.982	3.5
	TRPM2	Wild type	M	82.7143	3962	6.952	3.2
	TRPM2	Wild type	M	82.4286	3962	6.98033	2.9
	TRPM2	Wild type	M	82.7143	3962	6.96667	3.4
	TRPM2	Wild type	M	82.5714	3962	6.96433	3.4
	TRPM2	Wild type	M	82.4286	3962	7.00433	3
	TRPM2	Wild type	M	81	3962	7.005	3.1
	TRPM2	Wild type	M	81	3962	6.93767	3.5
	TRPM2	Wild type	M	80.5714	3962	6.97767	3.1
	TRPM2	Mutant	M	82.7143	3962	7.002	3.2
	TRPM2	Mutant	M	82.7143	3962	6.999	3.2
	TRPM2	Mutant	M	82.7143	3962	6.982	3.2
	TRPM2	Mutant	M	82.7143	3962	6.97367	3.2
	TRPM2	Mutant	M	82.7143	3962	7.024	3.1
	TRPM2	Mutant	M	82.7143	3962	6.96667	3
	TRPM2	Mutant	M	82.7143	3962	6.96267	3.2
	TRPM2	Mutant	M	82.7143	3962	6.942	3.3
	TRPM2	Mutant	M	82.5714	3962	6.97567	3.3
	TRPM2	Mutant	M	82.5714	3962	6.993	3
	TRPM2	Mutant	M	82.5714	3962	7.00867	3.3
	TRPM2	Mutant	M	82.4286	3962	6.99667	3.5
	TRPM2	Mutant	M	81	3962	6.977	3.2
	TRPM2	Mutant	M	81	3962	6.97	3.3
	TRPM2	Mutant	M	80.5714	3962	6.94967	3.2
	TRPM2	Mutant	M	80.5714	3962	6.96233	3.3
77	Cas1	Wild type	M	69.7143	2365	7.01233	3.1
	Cas1	Wild type	M	65	2365	7.006	3
	Cas1	Wild type	M	67.5714	2365	7.00267	2.9
	Cas1	Wild type	M	64.8571	2365	7.019	2.9
	Cas1	Wild type	M	65.2857	2365	7.04233	2.5
	Cas1	Wild type	M	66	2365	7.02067	2.9
	Cas1	Wild type	M	65.8571	2365	6.95833	3.1
	Cas1	Mutant	M	68.4286	2365	7.052	2.8
	Cas1	Mutant	M	64.8571	2365	7.019	3
	Cas1	Mutant	M	64.8571	2365	6.99567	3
	Cas1	Mutant	M	66	2365	7.00233	2.8
	Cas1	Mutant	M	64.8571	2365	7.006	3
	Cas1	Mutant	M	65.8571	2365	6.982	3.1
	Cas1	Mutant	M	68.1429	2365	7.01233	2.7
	Cas1	Mutant	M	67.7143	2365	7.00633	2.7
78	kOpioid	Wild type	M	22.1429	9	6.978	3.3
	kOpioid	Wild type	M	23.2857	7	6.95133	3.1
	kOpioid	Wild type	M	22.1429	7	6.98	3.1
	kOpioid	Wild type	F	22.1429	7	6.983	3
	kOpioid	Wild type	F	22.1429	7	6.97167	3.3
	kOpioid	Mutant	M	22	9	6.98767	3.3
	kOpioid	Mutant	M	21.8571	9	7.01433	3.4
	kOpioid	Mutant	M	21.8571	9	6.97867	3.6
	kOpioid	Mutant	M	21.8571	7	6.96767	3.3
	kOpioid	Mutant	F	22.2857	7	6.952	3.2
	kOpioid	Mutant	M	22.1429	7	6.975	3.3
	kOpioid	Mutant	F	22	7	6.97167	3.3
	kOpioid	Mutant	M	22	7	6.95967	3.2
	kOpioid	Mutant	M	22	7	6.96433	3.3
79	BEGAIN	Wild type	M	53.4286	2589	7.01567	3.8
	BEGAIN	Wild type	M	53.5714	2589	7.04133	3.5
	BEGAIN	Wild type	M	53.2857	2589	7.031	3.8
	BEGAIN	Wild type	M	52.2857	2589	7.01333	2.8
	BEGAIN	Wild type	M	53.2857	2589	7.029	3.3
	BEGAIN	Wild type	M	53.4286	2589	7.018	3.4
	BEGAIN	Wild type	M	53.4286	2589	7.01067	3.1
	BEGAIN	Mutant	M	53.5714	2589	7.05833	3.4
	BEGAIN	Mutant	M	53.5714	2589	7.074	3.3
	BEGAIN	Mutant	M	53.5714	2589	7.016	3.3
	BEGAIN	Mutant	M	53.2857	2589	7.038	3.4
	BEGAIN	Mutant	M	53.2857	2589	7.05033	3.4
	BEGAIN	Mutant	M	53.2857	2589	7.048	3.5
	BEGAIN	Mutant	M	52.5714	2589	7.05733	3.7
	BEGAIN	Mutant	M	52.2857	2589	7.02167	3.4
	BEGAIN	Mutant	M	53.5714	2589	7.03567	2.7
	BEGAIN	Mutant	M	53.4286	2589	7.044	3.2
	BEGAIN	Mutant	M	53.4286	2589	7.06	3.6
	BEGAIN	Mutant	M	53.2857	2589	7.02167	2.8
	BEGAIN	Mutant	M	52.5714	2589	7.00167	3.5
	BEGAIN	Mutant	M	52.2857	2589	7.047	3.4
	BEGAIN	Mutant	M	53.2857	2589	7.05633	3.3
	BEGAIN	Mutant	M	53.2857	2589	7.01633	3
	BEGAIN	Mutant	M	52.2857	2589	7.026	3.2
80	Activin	Wild type	M	36.8571	8	7.00267	3.4
	Activin	Wild type	M	36.8571	8	6.978	3.4
	Activin	Wild type	M	36.8571	8	7.032	3.3
	Activin	Wild type	M	36.8571	8	7.012	3.4
	Activin	Wild type	M	36.8571	8	6.974	3.6
	Activin	Wild type	M	36.8571	8	6.98267	3.5
	Activin	Wild type	M	36.8571	8	7.00833	3.6
	Activin	Wild type	M	36.8571	8	7.03067	2.9
	Activin	Wild type	M	36.8571	8	6.98167	3.6
	Activin	Wild type	M	36.8571	8	6.98067	3.6
	Activin	Wild type	M	36.8571	8	6.98667	3.4
	Activin	Wild type	M	36.8571	8	7.002	3.5
	Activin	Wild type	M	36.1429	8	6.97933	3.8
	Activin	Wild type	M	36.1429	8	7.018	3.5
	Activin	Wild type	M	36.1429	8	6.98967	3.9
	Activin	Mutant	M	36.8571	8	6.986	3.5
	Activin	Mutant	M	36.8571	8	7.03167	3.1
	Activin	Mutant	M	36.8571	8	7.00833	3.4
	Activin	Mutant	M	36.8571	8	7.00667	3.5
	Activin	Mutant	M	36.8571	8	6.996	3.7
	Activin	Mutant	M	36.8571	8	7.03067	3.1
	Activin	Mutant	M	36.8571	8	7.012	3.4
	Activin	Mutant	M	36.8571	8	6.986	3.6
	Activin	Mutant	M	36.8571	8	6.988	3.6
	Activin	Mutant	M	36.8571	8	6.94767	4.2
	Activin	Mutant	M	36.8571	8	6.95133	4
	Activin	Mutant	M	36.8571	8	6.98167	3.7
	Activin	Mutant	M	36.1429	8	6.98	3.6
	Activin	Mutant	M	36.1429	8	6.986	3.7
	Activin	Mutant	M	36.1429	8	7.01367	3.3
	Activin	Mutant	M	36.1429	8	6.964	3.7
	Activin	Mutant	M	36.1429	8	6.97467	3.5
81	Tgm3	Wild type	M	19.8571	168	7.01833	3.1
	Tgm3	Wild type	M	19.8571	168	6.98833	3.5
	Tgm3	Wild type	M	19.8571	168	7.01267	3.5
	Tgm3	Wild type	M	19.8571	168	7.019	3.2
	Tgm3	Wild type	M	19.8571	168	7.032	3.1
	Tgm3	Wild type	M	19.8571	168	7.03533	3.1
	Tgm3	Wild type	M	19.8571	168	7.00933	3.3
	Tgm3	Wild type	M	19.8571	168	6.96067	3.4
	Tgm3	Wild type	M	19.8571	168	7.008	3.3
	Tgm3	Wild type	M	19.8571	168	7	3.3
	Tgm3	Mutant	M	19.8571	168	7.03833	2.9
	Tgm3	Mutant	M	19.8571	168	7.02833	3.3
	Tgm3	Mutant	M	19.8571	168	7.05467	3.2
	Tgm3	Mutant	M	19.8571	168	6.99333	3.4
	Tgm3	Mutant	M	19.8571	168	7.006	3.3
	Tgm3	Mutant	M	19.8571	168	7	3.5
	Tgm3	Mutant	M	19.8571	168	6.99433	3.4
	Tgm3	Mutant	M	19.8571	168	7.02333	3.2
	Tgm3	Mutant	M	19.8571	168	6.994	3.3
	Tgm3	Mutant	M	19.8571	168	6.988	3.5
82	Ts1Cje	Wild type	M	104.571	2371	7.06067	3
	Ts1Cje	Wild type	M	104.571	2371	7.04333	3.2
	Ts1Cje	Wild type	M	104.429	2371	7.03433	3.3
	Ts1Cje	Wild type	M	104.286	2371	7.05767	3.1
	Ts1Cje	Wild type	M	103.857	2371	7.06267	2.9
	Ts1Cje	Wild type	M	103.714	2371	7.02633	3.3
	Ts1Cje	Wild type	M	103.714	2371	7.08833	3.2
	Ts1Cje	Wild type	M	103.571	2371	7.05633	2.7
	Ts1Cje	Wild type	M	103.571	2371	7.06133	2.9
	Ts1Cje	Wild type	M	103	2371	7.05833	3.3
	Ts1Cje	Wild type	M	103	2371	7.07033	3.1
	Ts1Cje	Wild type	M	102.429	2371	7.038	3.3
	Ts1Cje	Wild type	M	102.429	2371	7.03733	3.4
	Ts1Cje	Mutant	M	104.571	2371	7.03633	3.3
	Ts1Cje	Mutant	M	104.571	2371	7.04533	3.7
	Ts1Cje	Mutant	M	104.571	2371	7.04567	3.2
	Ts1Cje	Mutant	M	104.429	2371	7.066	3.2
	Ts1Cje	Mutant	M	104.286	2371	7.037	3.5
	Ts1Cje	Mutant	M	104.143	2371	7.024	3.4
	Ts1Cje	Mutant	M	103.857	2371	6.99433	3.3
	Ts1Cje	Mutant	M	103.714	2371	7.00833	3.7
	Ts1Cje	Mutant	M	103.714	2371	7.072	3.1
	Ts1Cje	Mutant	M	103.571	2371	7.04033	3.2
	Ts1Cje	Mutant	M	103	2371	7.04633	3.4
	Ts1Cje	Mutant	M	103	2371	7.022	2.8
	Ts1Cje	Mutant	M	103	2371	7.059	3.3
	Ts1Cje	Mutant	M	102.429	2371	7.00233	3.4
	Ts1Cje	Mutant	M	102.429	2371	7.03	3.1
	Ts1Cje	Mutant	M	102.286	2371	7.02067	3.3
83	BIG2	Wild type	M	68.2857	4373	7.045	3.3
	BIG2	Wild type	M	68.2857	4373	7.00733	3.2
	BIG2	Wild type	M	67.7143	4373	7.04267	3
	BIG2	Wild type	M	67.7143	4373	7.071	3.4
	BIG2	Wild type	M	68.1429	4373	7.052	3.2
	BIG2	Wild type	M	67.8571	4373	7.044	3.2
	BIG2	Wild type	M	66.8571	4373	7.038	3.3
	BIG2	Wild type	M	67.1429	4373	7.063	3.2
	BIG2	Wild type	M	66.7143	4373	7.03033	3.5
	BIG2	Wild type	M	66.7143	4373	7.05333	3.3
	BIG2	Wild type	M	66.1429	4373	7.04367	3.2
	BIG2	Wild type	M	66.1429	4373	7.061	3.5
	BIG2	Mutant	M	68.2857	4373	7.055	3.1
	BIG2	Mutant	M	68.2857	4373	7.022	3.3
	BIG2	Mutant	M	68.2857	4373	7.027	3.1
	BIG2	Mutant	M	68.2857	4373	7.04533	3.4
	BIG2	Mutant	M	68.1429	4373	7.07233	3.3
	BIG2	Mutant	M	67.8571	4373	7.00767	3.8
	BIG2	Mutant	M	66.8571	4373	7.06533	3.4
	BIG2	Mutant	M	66.8571	4373	7.04767	3.6
	BIG2	Mutant	M	66.7143	4373	6.99267	3.4
	BIG2	Mutant	M	66.7143	4373	7.004	3.4
	BIG2	Mutant	M	66.1429	4373	7.068	3.3
	BIG2	Mutant	M	66.8571	4373	7.01	3.7
84	GRA1CS	Wild type	M	80.5714	1951	7.11067	3.1
	GRA1CS	Wild type	M	80.5714	1951	7.07667	3.2
	GRA1CS	Wild type	M	80.5714	1951	7.104	3.4
	GRA1CS	Wild type	M	80.5714	1951	7.08767	3.2
	GRA1CS	Wild type	M	80.4286	1951	7.06567	3.1
	GRA1CS	Wild type	M	80	1951	7.09167	3
	GRA1CS	Wild type	M	80	1951	7.05067	3.4
	GRA1CS	Wild type	M	79.4286	1951	7.08233	3.1
	GRA1CS	Wild type	M	79	1951	7.09667	3
	GRA1CS	Wild type	M	79	1951	7.08567	3.1
	GRA1CS	Wild type	M	79	1951	7.07533	3.3
	GRA1CS	Wild type	M	78.5714	1951	7.089	3.1
	GRA1CS	Mutant	M	80.1429	1951	7.081	3.1
	GRA1CS	Mutant	M	80.1429	1951	7.073	3.4
	GRA1CS	Mutant	M	79.8571	1951	7.111	3
	GRA1CS	Mutant	M	80	1951	7.094	3.2
	GRA1CS	Mutant	M	79.4286	1951	7.07	3.2
	GRA1CS	Mutant	M	79.5714	1951	7.09367	3.1
	GRA1CS	Mutant	M	78.8571	1951	7.053	3.4
	GRA1CS	Mutant	M	78.5714	1951	7.048	3.4
	GRA1CS	Mutant	M	78.5714	1951	7.07	3.4
85	Papst1	Wild type	M	106.571	1834	7.03067	3.9
	Papst1	Wild type	M	106.571	1834	7.042	3.8
	Papst1	Wild type	M	106.571	1834	7.044	3.7
	Papst1	Wild type	M	107.143	1834	7.08033	3.7
	Papst1	Wild type	M	106.571	1834	7.1	3.3
	Papst1	Wild type	M	106.571	1834	7.057	3.8
	Papst1	Wild type	M	104.286	1834	7.00333	3.7
	Papst1	Wild type	M	104.286	1834	7.054	3.5
	Papst1	Mutant	M	107.143	1834	7.066	3.4
	Papst1	Mutant	M	106.571	1834	7.05733	3.5
	Papst1	Mutant	M	105.429	1834	7.064	3.6
	Papst1	Mutant	M	105.143	1834	7.05633	3.6
86	Scn1a	Wild type	F	4.85714	87	6.97967	3.6
	Scn1a	Wild type	M	4.85714	87	7.00833	3
	Scn1a	Wild type	F	4.57143	79	7.026	2.9
	Scn1a	Wild type	M	4.57143	79	7.05567	2.6
	Scn1a	Wild type	F	7.71429	23	7.045	2.9
	Scn1a	Wild type	M	7.71429	23	6.98533	3.4
	Scn1a	Wild type	M	6.42857	23	7.00033	3.1
	Scn1a	Wild type	F	9.28571	23	6.95933	3.3
	Scn1a	Wild type	F	9.28571	23	7.03533	3.2
	Scn1a	Mutant	F	4.85714	87	6.934	3.7
	Scn1a	Mutant	M	4.85714	87	6.984	3.8
	Scn1a	Mutant	F	4.57143	79	6.93833	4.1
	Scn1a	Mutant	M	4.57143	79	6.981	3.4
	Scn1a	Mutant	F	7.71429	23	6.939	3.9
	Scn1a	Mutant	M	7.71429	23	6.97933	3.4
	Scn1a	Mutant	M	6.42857	23	6.95667	3.8
	Scn1a	Mutant	M	9.28571	23	6.962	3.6
	Scn1a	Mutant	F	9.28571	23	6.95033	3.6
87	Ndufs4	Wild type	M	5.28571	95	7.01667	3.4
	Ndufs4	Wild type	F	13.7143	95	6.98333	3.7
	Ndufs4	Wild type	M	6.28571	45	7.06667	3.2
	Ndufs4	Wild type	F	6.28571	45	7.02133	3.1
	Ndufs4	Wild type	M	4.42857	45	7.04733	3.3
	Ndufs4	Wild type	F	4.42857	45	7.006	3.3
	Ndufs4	Wild type	M	4.42857	45	7.048	3.3
	Ndufs4	Mutant	F	5.28571	95	6.84733	5.4
	Ndufs4	Mutant	M	13.7143	95	6.95533	5.6
	Ndufs4	Mutant	F	6.28571	45	6.91	5.5
	Ndufs4	Mutant	M	6.28571	45	6.98833	4.2
	Ndufs4	Mutant	M	4.42857	45	7.03267	3.4
	Ndufs4	Mutant	F	4.42857	45	7.01	3.8
	Ndufs4	Mutant	F	4.42857	45	6.93267	5
88	Ube3a	Wild type	M	66.5714	87	7.03633	3.2
	Ube3a	Wild type	M	66.5714	87	7.02367	3.3
	Ube3a	Wild type	M	68.5714	87	6.97433	3.3
	Ube3a	Wild type	M	68.5714	87	6.99	3.1
	Ube3a	Wild type	M	67.7143	87	6.982	3.3
	Ube3a	Wild type	M	68.7143	87	6.98533	3.4
	Ube3a	Wild type	M	73	87	7.01267	3.5
	Ube3a	Wild type	M	73	87	6.99167	3.2
	Ube3a	Mutant	M	66.5714	87	7.06933	3.4
	Ube3a	Mutant	M	66.5714	87	7.05533	3.2
	Ube3a	Mutant	M	68.5714	87	6.954	3.8
	Ube3a	Mutant	M	68.5714	87	6.96167	3.5
	Ube3a	Mutant	M	67.7143	87	6.99467	3.4
	Ube3a	Mutant	M	68.7143	87	6.991	3.6
	Ube3a	Mutant	M	73	87	7.04167	3.3
	Ube3a	Mutant	M	73	87	7.022	3.4
89	TMEM155	Wild type	M	51.7143	859	7.10233	3
	TMEM155	Wild type	M	50.1429	859	7.02167	3.1
	TMEM155	Wild type	M	50.8571	858	7.08067	3.2
	TMEM155	Wild type	M	50.5714	858	7.08833	3.5
	TMEM155	Wild type	M	50.2857	858	7.06033	3.1
	TMEM155	Wild type	M	50.2857	858	7.031	3.4
	TMEM155	Wild type	M	49.4286	858	7.04267	3.1
	TMEM155	Wild type	M	48.2857	858	7.01833	3.4
	TMEM155	Wild type	M	48.2857	858	7.05233	3.6
	TMEM155	Wild type	M	48.2857	858	7.05367	3.2
	TMEM155	Wild type	M	47.1429	858	7.05033	3.2
	TMEM155	Wild type	M	47.1429	858	7.032	3.3
	TMEM155	Wild type	M	51.5714	859	7.05467	3
	TMEM155	Wild type	M	51.7143	858	7.01833	3.3
	TMEM155	Wild type	M	51.2857	859	7.06033	3.3
	TMEM155	Wild type	M	51.2857	859	7.07767	3.2
	TMEM155	Wild type	M	51	859	7.04833	3.3
	TMEM155	Wild type	M	51.1429	858	7.07667	3.3
	TMEM155	Mutant	M	50.1429	859	7.06867	3.3
	TMEM155	Mutant	M	51.2857	859	7.105	3.4
	TMEM155	Mutant	M	51	859	7.10067	3.3
	TMEM155	Mutant	M	50.8571	858	7.04833	3.1
	TMEM155	Mutant	M	50.8571	858	7.04267	3.1
	TMEM155	Mutant	M	50.5714	858	7.063	3.3
	TMEM155	Mutant	M	50.2857	858	7.06733	3.2
	TMEM155	Mutant	M	49.4286	858	7.01167	3.5
	TMEM155	Mutant	M	48.2857	858	7.04967	3.2
	TMEM155	Mutant	M	48.2857	858	7.025	3.4
	TMEM155	Mutant	M	48.2857	858	7.08767	3.1
	TMEM155	Mutant	M	47.7143	858	7.088	3
	TMEM155	Mutant	M	47.1429	858	7.011	3.5
	TMEM155	Mutant	M	51.5714	859	7.05833	3.1
	TMEM155	Mutant	M	51.5714	859	7.04633	3.3
	TMEM155	Mutant	M	51	859	6.99433	3.6
	TMEM155	Mutant	M	50.8571	859	7.03233	3.4
	TMEM155	Mutant	M	50.8571	859	7.01667	3.3
90	Eif2a	Wild type	M	28.5714	474	7.05767	3.1
	Eif2a	Wild type	M	25.7143	474	7.07767	2.6
	Eif2a	Wild type	M	22.7143	474	7.05533	2.8
	Eif2a	Wild type	M	22.1429	474	7.04433	3.1
	Eif2a	Wild type	M	20	473	7.06933	3.1
	Eif2a	Wild type	M	20	473	7.03167	3.2
	Eif2a	Wild type	M	19	473	7.07633	3
	Eif2a	Wild type	M	23	474	7.08667	2.6
	Eif2a	Wild type	M	23	474	7.04267	2.9
	Eif2a	Wild type	M	21	473	7.06867	3
	Eif2a	Wild type	M	21	473	7.03567	3.2
	Eif2a	Wild type	M	19.5714	473	7.075	3
	Eif2a	Wild type	M	19.5714	473	7.03133	3.2
	Eif2a	Wild type	M	19.5714	473	6.99733	3.2
	Eif2a	Wild type	M	25.1429	474	7.04333	2.8
	Eif2a	Wild type	M	25.1429	474	7.06233	2.9
	Eif2a	Wild type	M	24.2857	474	7.03967	3.1
	Eif2a	Mutant	M	28.4286	474	7.09267	2.8
	Eif2a	Mutant	M	25.5714	474	7.02767	3
	Eif2a	Mutant	M	25.1429	474	7.019	2.9
	Eif2a	Mutant	M	24.1429	474	6.99267	3.4
	Eif2a	Mutant	M	23.5714	474	7.03767	3.1
	Eif2a	Mutant	M	23	474	7.054	2.8
	Eif2a	Mutant	M	19.8571	474	7.03933	3
	Eif2a	Mutant	M	22.1429	474	7.05767	2.8
	Eif2a	Mutant	M	20.8571	473	7.04933	3.2
	Eif2a	Mutant	M	20.1429	473	7.03467	3.3
	Eif2a	Mutant	M	19.5714	473	7.08	3.2
	Eif2a	Mutant	M	20.8571	474	7.02767	3.2
	Eif2a	Mutant	M	19.5714	473	7.06	3.1
	Eif2a	Mutant	M	19.5714	473	7.01333	3.4
	Eif2a	Mutant	M	19.5714	473	6.99933	3.5
	Eif2a	Mutant	M	19.2857	473	7.01933	3.2
	Eif2a	Mutant	M	19.2857	473	7.05067	3.2
	Eif2a	Mutant	M	25.1429	474	7.02667	3.2
	Eif2a	Mutant	M	25.1429	474	7.05167	2.7
91	Eif2d	Wild type	M	43.7143	91	7.01567	3.5
	Eif2d	Wild type	M	41.2857	91	7.02133	3.6
	Eif2d	Wild type	M	40.8571	91	7.09133	3.3
	Eif2d	Wild type	M	40.8571	91	7.06667	3.4
	Eif2d	Wild type	M	38.2857	91	7.11033	3.1
	Eif2d	Wild type	M	40.8571	91	7.09633	3.1
	Eif2d	Wild type	M	40.8571	91	7.01867	3.6
	Eif2d	Wild type	M	41.1429	91	7.08467	3.4
	Eif2d	Wild type	M	40.8571	91	7.10767	2.7
	Eif2d	Wild type	M	39.1429	91	7.07667	3.2
	Eif2d	Wild type	M	39.1429	91	7.09033	3.5
	Eif2d	Wild type	M	38.8571	91	7.08733	3.4
	Eif2d	Wild type	M	38.8571	91	7.06233	3.3
	Eif2d	Wild type	M	37.8571	91	7.09767	3.1
	Eif2d	Wild type	M	43.7143	91	7.02467	3.5
	Eif2d	Wild type	M	43.7143	91	7.05067	3.7
	Eif2d	Wild type	M	43.7143	91	6.99533	3.5
	Eif2d	Wild type	M	43.8571	91	7.09033	3.2
	Eif2d	Wild type	M	43.8571	91	7.03767	3.5
	Eif2d	Wild type	M	41.2857	91	7.056	3.7
	Eif2d	Mutant	M	43.7143	91	7.01833	3.7
	Eif2d	Mutant	M	42.1429	91	7.032	3.5
	Eif2d	Mutant	M	41.2857	91	7.06467	3.5
	Eif2d	Mutant	M	41.1429	91	7.00933	3.8
	Eif2d	Mutant	M	40.8571	91	7.11467	3.1
	Eif2d	Mutant	M	39.1429	91	7.07433	3.5
	Eif2d	Mutant	M	39.1429	91	7.064	3.5
	Eif2d	Mutant	M	38.8571	91	7.09467	3.5
	Eif2d	Mutant	M	38.8571	91	7.09233	3.5
	Eif2d	Mutant	M	38.1429	91	7.107	2.8
	Eif2d	Mutant	M	38.1429	91	7.041	3.5
	Eif2d	Mutant	M	38.1429	91	7.07833	2.9
	Eif2d	Mutant	M	37.8571	91	7.06167	3.6
	Eif2d	Mutant	M	43.7143	91	7.064	3.6
	Eif2d	Mutant	M	43.7143	91	7.03233	3.6
	Eif2d	Mutant	M	43.7143	91	7.02267	3.5
	Eif2d	Mutant	M	43	91	7.05933	3.6
	Eif2d	Mutant	M	43	91	7.00933	3.6
	Eif2d	Mutant	M	41.2857	91	7.03933	3.5
92	RNG105	Wild type	M	72.8571	2404	7.05733	3.6
	RNG105	Wild type	M	72.8571	2404	7.042	3.7
	RNG105	Wild type	M	72.4286	2404	7.08833	3.1
	RNG105	Wild type	M	72.4286	2404	7.03433	3.5
	RNG105	Wild type	M	72.4286	2404	7.07533	3.5
	RNG105	Wild type	M	72.4286	2404	7.047	3.5
	RNG105	Wild type	M	72.1429	2404	7.04167	3.6
	RNG105	Wild type	M	72.1429	2404	7.046	3.4
	RNG105	Wild type	M	72.8571	2404	7.04867	3.6
	RNG105	Wild type	M	72.8571	2404	7.01133	3.8
	RNG105	Wild type	M	72.4286	2404	7.04967	3.7
	RNG105	Wild type	M	72.4286	2404	7.01567	3.7
	RNG105	Mutant	M	72.7143	2404	7.015	3.5
	RNG105	Mutant	M	72.7143	2404	7.04333	3.5
	RNG105	Mutant	M	72.4286	2404	7.02533	3.6
	RNG105	Mutant	M	72.4286	2404	7.06433	3.3
	RNG105	Mutant	M	72.4286	2404	7.02933	3.7
	RNG105	Mutant	M	72.4286	2404	7.00533	3.6
	RNG105	Mutant	M	72.1429	2404	7.03233	3.5
	RNG105	Mutant	M	72.1429	2404	7.02167	3.5
	RNG105	Mutant	M	72.4286	2404	7.03133	3.9
	RNG105	Mutant	M	72.4286	2404	7.031	3.6
93	SRCP	Wild type	M	95.2857	4189	7.10533	3.4	C
	SRCP	Wild type	M	95.2857	4189	7.02833	3.5
	SRCP	Wild type	M	95.2857	4189	7.08833	3.7
	SRCP	Wild type	M	94.7143	4189	7.06433	3.1
	SRCP	Wild type	M	94.7143	4189	6.98867	3.9
	SRCP	Wild type	M	94.7143	4189	6.98667	4.5
	SRCP	Wild type	M	94.7143	4189	7.00833	4.2
	SRCP	Wild type	M	94.7143	4189	6.97033	3.5
	SRCP	Wild type	M	94.1429	4189	7.01967	4.1
	SRCP	Wild type	M	94.1429	4189	7.01833	4.4
	SRCP	Wild type	M	94.1429	4189	7.01867	4.7
	SRCP	Wild type	M	94.7143	4189	7.03267	4.2
	SRCP	Wild type	M	94.7143	4189	7.00233	5
	SRCP	Wild type	M	94.1429	4189	7.00933	4.8
	SRCP	Mutant	M	95.2857	4189	6.993	4.1
	SRCP	Mutant	M	95.2857	4189	7.02867	3.2
	SRCP	Mutant	M	95.2857	4189	7.059	3.9
	SRCP	Mutant	M	94.7143	4189	7.06533	4
	SRCP	Mutant	M	94.7143	4189	7.01533	3.9
	SRCP	Mutant	M	94.7143	4189	6.97333	4.6
	SRCP	Mutant	M	94.7143	4189	7.055	4.1
	SRCP	Mutant	M	94.1429	4189	7.056	3.6
	SRCP	Mutant	M	94.1429	4189	6.99733	6.4
	SRCP	Mutant	M	94.1429	4189	6.97933	5.3
	SRCP	Mutant	M	94.1429	4189	7.03333	4
94	Stx1a	Wild type	M	64.1429	4490	7.02133	2.8
	Stx1a	Wild type	M	64.1429	4490	7.041	2.9
	Stx1a	Wild type	M	64.1429	4490	7.04433	2.8
	Stx1a	Wild type	M	64.1429	4490	7.04267	2.8
	Stx1a	Wild type	M	64.1429	4490	7.03567	2.8
	Stx1a	Wild type	M	64.1429	4490	7.04033	2.7
	Stx1a	Wild type	M	64.1429	4490	7.09167	3
	Stx1a	Wild type	M	64.1429	4490	7.03267	3.1
	Stx1a	Wild type	M	64.1429	4490	7.041	2.7
	Stx1a	Wild type	M	64.1429	4490	7.07833	2.5
	Stx1a	Wild type	M	64.1429	4490	7.1	2.8
	Stx1a	Wild type	M	64.1429	4490	7.07733	2.5
	Stx1a	Wild type	M	64.1429	4490	7.08133	2.3
	Stx1a	Wild type	M	64.1429	4490	7.083	2.7
	Stx1a	Wild type	M	64.1429	4490	7.048	2.5
	Stx1a	Wild type	M	64.1429	4490	7.07267	3
	Stx1a	Wild type	M	64.1429	4490	7.085	2.9
	Stx1a	Wild type	M	64.1429	4490	7.072	2.7
	Stx1a	Wild type	M	64.1429	4490	7.013	3.1
	Stx1a	Mutant	M	64.1429	4490	7.02433	2.5
	Stx1a	Mutant	M	64.1429	4490	7.05833	3.2
	Stx1a	Mutant	M	64.1429	4490	7.01833	3.1
	Stx1a	Mutant	M	64.1429	4490	7.01167	3.2
	Stx1a	Mutant	M	64.1429	4490	7.08467	2.9
	Stx1a	Mutant	M	64.1429	4490	7.02067	2.9
	Stx1a	Mutant	M	64.1429	4490	7.03933	3
	Stx1a	Mutant	M	64.1429	4490	7.00767	3.3
	Stx1a	Mutant	M	64.1429	4490	7.02533	3
	Stx1a	Mutant	M	64.1429	4490	7.044	3
	Stx1a	Mutant	M	64.1429	4490	7.05167	2.8
	Stx1a	Mutant	M	64.1429	4490	7.07133	2.9
	Stx1a	Mutant	M	64.1429	4490	7.049	2.8
	Stx1a	Mutant	M	64.1429	4490	7.035	3.2
	Stx1a	Mutant	M	64.1429	4490	7.05667	2.6
	Stx1a	Mutant	M	64.1429	4490	7.07267	2.7
	Stx1a	Mutant	M	64.1429	4490	7.00533	2.6
95	GT1	Wild type	M	55.1429	3224	6.99233	3.2
	GT1	Wild type	M	55.1429	3224	7.05467	3
	GT1	Wild type	M	55	3224	7.03233	3.2
	GT1	Wild type	M	55	3224	7.01233	3
	GT1	Wild type	M	55	3224	6.92967	3.2
	GT1	Wild type	M	55	3224	7.00933	3.1
	GT1	Wild type	M	55	3224	7.02767	2.8
	GT1	Wild type	M	55.1429	3224	6.98833	3.6
	GT1	Wild type	M	55	3224	6.99533	3
	GT1	Wild type	M	55	3224	7.03333	2.9
	GT1	Wild type	M	55.1429	3224	7.02167	3.2
	GT1	Mutant	M	55.1429	3224	7.01933	3
	GT1	Mutant	M	55.1429	3224	7.03567	2.8
	GT1	Mutant	M	55	3224	7.04433	2.6
	GT1	Mutant	M	55	3224	7.05533	2.7
	GT1	Mutant	M	55	3224	7.03333	2.6
	GT1	Mutant	M	55	3224	7.02233	2.8
	GT1	Mutant	M	55	3224	7.02933	2.9
	GT1	Mutant	M	55	3224	7.01567	2.8
	GT1	Mutant	M	55.1429	3224	7.00833	3.3
	GT1	Mutant	M	55	3224	7.00433	2.8
	GT1	Mutant	M	55	3224	7.00333	3.1
	GT1	Mutant	M	55.1429	3224	7.00167	3.1
96	Zfh5s	Wild type	F	29.1429	3229	6.97867	3.1
	Zfh5s	Wild type	M	29.1429	3229	7.00267	3.4
	Zfh5s	Wild type	M	29.1429	3229	6.97833	3.3
	Zfh5s	Wild type	M	29.1429	3229	6.97233	3.5
	Zfh5s	Wild type	F	29.1429	3229	6.99967	3.1
	Zfh5s	Wild type	F	29.1429	3229	7.01033	3
	Zfh5s	Wild type	M	29.1429	3229	7.03167	3.1
	Zfh5s	Wild type	F	29.1429	3229	7.00167	2.9
	Zfh5s	Wild type	M	29.1429	3229	6.98633	3.3
	Zfh5s	Wild type	M	29	3229	6.98867	3.3
	Zfh5s	Wild type	F	28.5714	3229	7.01767	2.8
	Zfh5s	Wild type	F	28.5714	3229	6.965	3.2
	Zfh5s	Mutant	F	29.1429	3229	6.99567	2.9
	Zfh5s	Mutant	M	29.1429	3229	6.99333	3
	Zfh5s	Mutant	M	29.1429	3229	7.00567	2.8
	Zfh5s	Mutant	F	29.1429	3229	7.007	3
	Zfh5s	Mutant	F	29.1429	3229	6.98867	3
	Zfh5s	Mutant	M	29.1429	3229	6.98733	3.3
	Zfh5s	Mutant	F	29.1429	3229	6.97533	3.2
	Zfh5s	Mutant	M	29.1429	3229	6.99233	3.5
	Zfh5s	Mutant	M	29	3229	6.993	3.1
	Zfh5s	Mutant	F	28.5714	3229	7.00333	2.8
	Zfh5s	Mutant	F	28.4286	3229	7.009	2.7
	Zfh5s	Mutant	M	28.4286	3229	6.99533	3.4
97	Scop	Wild type	M	65	1858	7.00733	2.9
	Scop	Wild type	M	63.4286	1858	7.01833	2.8
	Scop	Wild type	M	61.7143	1858	7.00967	2.8
	Scop	Wild type	M	56.1429	1858	6.98867	3.1
	Scop	Wild type	M	50.7143	1858	6.99733	3.2
	Scop	Wild type	M	50.7143	1858	7.01167	3.2
	Scop	Wild type	M	50.7143	1858	7.02233	2.7
	Scop	Wild type	M	50.7143	1858	7.02067	2.9
	Scop	Wild type	M	49	1858	7.00833	3
	Scop	Mutant	M	64.8571	1858	6.99267	3.2
	Scop	Mutant	M	64.8571	1858	7.011	3.1
	Scop	Mutant	M	64	1858	7.03267	2.8
	Scop	Mutant	M	50.7143	1858	7.01533	2.8
	Scop	Mutant	M	50.7143	1858	7.00833	2.9
	Scop	Mutant	M	49.4286	1858	6.99467	2.8
	Scop	Mutant	M	47.4286	1858	7.00433	3.1
98	LINC643	Wild type	M	73.1429	593	7.051	2.4
	LINC643	Wild type	M	72.8571	593	7.04367	2.6
	LINC643	Wild type	M	72.8571	593	7.06967	2.8
	LINC643	Wild type	M	72	593	7.08033	2.9
	LINC643	Wild type	M	70	593	7.10133	2.9
	LINC643	Wild type	M	69.7143	593	7.019	3
	LINC643	Wild type	M	69.7143	593	7.05433	3
	LINC643	Wild type	M	69.2857	593	7.02833	2.7
	LINC643	Wild type	M	69.2857	593	7.03367	3
	LINC643	Wild type	M	68.4286	593	7.03567	2.7
	LINC643	Wild type	M	68.4286	593	6.97833	3.3
	LINC643	Wild type	M	67	593	7.034	3
	LINC643	Wild type	M	66.2857	593	7.06633	2.8
	LINC643	Wild type	M	65.7143	593	7.02133	2.8
	LINC643	Wild type	M	76.7143	593	6.97333	3.1
	LINC643	Wild type	M	76.7143	593	7.065	2.7
	LINC643	Wild type	M	76.5714	593	7.02067	3
	LINC643	Wild type	M	76.2857	593	7.03833	2.8
	LINC643	Mutant	M	73.4286	593	6.99033	3
	LINC643	Mutant	M	73.4286	593	7.06333	2.6
	LINC643	Mutant	M	73.1429	593	7.04033	2.7
	LINC643	Mutant	M	73.1429	593	7.04933	2.9
	LINC643	Mutant	M	72.8571	593	7.12633	2.7
	LINC643	Mutant	M	72.8571	593	7.04833	2.8
	LINC643	Mutant	M	72.8571	593	7.05633	2.8
	LINC643	Mutant	M	71.8571	593	7.033	2.8
[truncated: 296 more rows]
