# Supplementary material for: Large-scale animal model study uncovers altered brain pH and lactate levels as a transdiagnostic endophenotype of neuropsychiatric disorders involving cognitive impairment
Source: eLife. 2024 Mar 26;12:RP89376. doi: 10.7554/eLife.89376 (PMC10965225; doi:10.7554/eLife.89376)
Supplement: Supplementary file 3. [file elife-89376-supp3.xlsx]

## Sheet: TableS3
Supplementary File 3. Detailed statistical analysis of pH and lactate measurements in 109 strains/conditions of animals
				pH					Lactate					Multiple comarisons
	Strain/Condition	Inclusion in the prediction analyses	Type of test (1, Unpaired t test; 2, 1-way ANOVA; 3, 2-way ANOVA)	Mean ± SD calculated based on biological replicates	F (DFn, DFd)	P value	P value summary (#P < 0.1; *P < 0.05; **P < 0.01)		Mean ± SD calculated based on biological replicates	F (DFn, DFd)	P value	P value summary (#P < 0.1; *P < 0.05; **P < 0.01)		pH	Lactate
Exploratory cohort	APP Tg	y	1	Con: 7.006 ± 0.016 Tg: 6.985 ± 0.011	F (8, 6) = 2.154	P = 0.0074	**		Con: 3.26 ± 0.14 Tg: 3.54 ± 0.11	F (8, 6) = 1.577	P = 0.0007	**
	Arid1b KO	y	1	Con: 7.001 ± 0.024 KO: 7.008 ± 0.023	F (11, 7) = 1.076	P = 0.5409	ns		Con: 2.73 ± 0.22 KO: 2.78 ± 0.18	F (11, 7) = 1.415	P = 0.5999	ns
	Auts2 KO (1st & 2nd)	n	3	1st batch Con: 7.074 ± 0.025 KO: 7.091 ± 0.026 2nd batch Con: 7.053 ± 0.034 KO: 7.088 ± 0.025	Batch effect: F (1, 16) = 0.9979 Genotype effect: F (1, 16) = 4.379 Batch × Genotype interaction: F (1, 16) = 0.5542	P = 0.3327 P = 0.0527 P = 0.4674	ns # ns		1st batch Con: 3.06 ± 0.17 KO: 3.36 ± 0.18 2nd batch Con: 3.34 ± 0.29 KO: 3.20 ± 0.07	Batch effect: F (1, 16) = 0.4832 Genotype effect: F (1, 16) = 0.8591 Batch × Genotype interaction: F (1, 16) = 6.497	P = 0.4969 P = 0.3678 P = 0.0215	ns ns *
	Barp KO	y	1	Con: 7.169 ± 0.036 KO: 7.155 ± 0.018	F (9, 9) = 4.039	F = 0.2901	ns		Con: 3.17 ± 0.21 KO: 3.25 ± 0.21	F (9, 9) = 1.010	P = 0.4090	ns
	Bdnf KO	n	1	Con: 6.862 ± 0.026 KO: 6.844 ± 0.005	F (8, 6) = 24.80	P = 0.0918	#		Con: 2.57 ± 0.22 KO: 2.59 ± 0.12	F (8, 6) = 3.387	P = 0.8426	ns
	BTBR (1st & 2nd)	y	3	1st batch Con: 7.149 ± 0.020 BTBR: 7.172 ± 0.025 2nd batch Con: 7.130 ± 0.022 BTBR: 7.155 ± 0.025	Batch effect: F (1, 35) = 5.671 Genotype effect: F (1, 35) = 10.30 Batch × Genotype interaction: F (1, 35) = 0.03979	P = 0.0228 P = 0.0029 P = 0.8430	* ** ns		1st batch Con: 3.04 ± 0.14 BTBR: 2.93 ± 0.14 2nd batch Con: 3.13 ± 0.14 BTBR: 2.94 ± 0.23	Batch effect: F (1, 35) = 1.020 Genotype effect: F (1, 35) = 8.259 Batch × Genotype interaction: F (1, 35) = 0.4189	P = 0.3196 P = 0.0069 P = 0.5217	ns ** ns
	Camk2a KO	y	1	Con: 7.205 ± 0.020 KO: 7.144 ± 0.021	F (4, 4) = 1.088	P = 0.0013	**		Con: 2.58 ± 0.08 KO: 2.86 ± 0.05	F (4, 4) = 2.333	P = 0.0002	**
	Camkk1 KO	n	1	Con: 7.082 ± 0.046 KO: 7.068 ± 0.037	F (5, 5) = 1.540	P = 0.5678	ns		Con: 2.42 ± 0.08 KO: 2.53 ± 0.23	F (5, 5) = 8.941	P = 0.2563	ns
	Ccnd2 KO	n	1	Con: 6.802 ± 0.026 KO: 6.799 ± 0.035	F (6, 12) = 1.857	P = 0.1534	ns		Con: 3.48 ± 0.31 KO: 3.40 ± 0.16	F (6, 12) = 3.697	P = 0.5555	ns
	CFA treatment	y	1	Con: 7.001 ± 0.044 CFA: 6.993 ± 0.055	F (11, 11) = 1.582	P = 0.7186	ns		Con: 2.99 ± 0.12 CFA: 2.93 ± 0.14	F (11, 11) = 1.385	P = 0.2733	ns
	Chd8 KO	y	1	Con: 7.121 ± 0.007 KO: 7.083 ± 0.015	F (4, 4) = 4.811	P = 0.0007	**		Con: 2.58 ± 0.19 KO: 3.04 ± 0.18	F (4, 4) = 1.121	P = 0.0046	**
	Chn1 KO	n	1	Con: 6.786 ± 0.066 KO: 6.820 ± 0.070	F (6, 5) = 1.131	P = 0.3932	ns		Con: 3.07 ± 0.12 KO: 3.01 ± 0.12	F (6, 5) = 1.006	P = 0.4541	ns
	Clock KO	n	1	Con: 7.087 ± 0.016 KO: 7.128 ± 0.016	F (10, 9) = 1.055	P < 0.0001	**		Con: 3.04 ± 0.16 KO: 2.75 ± 0.13	F (10, 9) = 1.488	P = 0.0002	**
	Corticosterone treatment	y	1	Con: 7.030 ± 0.018 CORT: 6.966 ± 0.040	F ( 10, 19) = 4.659	P < 0.0001	**		Con: 2.82 ± 0.17 CORT: 3.28 ± 0.33	F (10, 19) = 3.708	P < 0.0001	**
	Crmp2 KO	n	1	Con: 6.899 ± 0.060 KO: 6.952 ± 0.074	F (5, 5) = 1.515	P = 0.2005	ns		Con: 4.47 ± 0.45 KO: 3.90 ± 0.84	F (5, 5) = 3.387	P = 0.1756	ns
	Dextran treatment	n	1	Con: 7.016 ± 0.022 DSS: 6.980 ± 0.029	F (11, 11) = 1.793	P = 0.0025	**		Con: 2.44 ± 0.24 DSS: 2.72 ± 0.23	F (11, 11) = 1.091	P = 0.0088	**
	Disc1-L100P Tg	y	1	Con: 7.126 ± 0.027 Tg: 7.129 ± 0.028	F (5, 5) = 1.095	P = 0.8619	ns		Con: 2.60 ± 0.11 Tg: 2.58 ± 0.13	F (5, 5) = 1.472	P = 0.8174	ns
	Disc1-Q31L Tg	y	1	Con: 7.100 ± 0.023 Tg: 7.109 ± 0.019	F (5, 5) = 1.414	P = 0.5007	ns		Con: 3.05 ± 0.21 Tg: 3.10 ± 0.13	F (5, 5) = 2.688	P = 0.6250	ns
	Dyrk1a KO	n	1	Con: 7.168 ± 0.016 KO: 7.193 ± 0.014	F (4, 4) = 1.354	P = 0.0323	*		Con: 2.72 ± 0.15 KO: 2.74 ± 0.13	F (4, 4) = 1.222	P = 0.8287	ns
	ECS treatment	n	1	Con: 7.098 ± 0.028 ECS: 7.037 ± 0.037	F (7, 7) = 1.755	P = 0.0022	**		Con: 2.78 ± 0.10 ECS: 3.11 ± 0.17	F (7, 7) = 2.783	P = 0.0003	**
	Fmr1 KO	n	1	Con: 6.940 ± 0.015 KO: 6.952 ± 0.018	F (8, 6) = 1.587	P = 0.1653	ns		Con: 3.57 ± 0.24 KO: 3.31 ± 0.17	F (8, 6) = 2.064	P = 0.0240	*
	Gasc1 KO (1st-3rd)	y	3	1st batch Con: 7.111 ± 0.026 KO: 7.092 ± 0.030 2nd batch Con: 7.192 ± 0.038 KO: 7.196 ± 0.035 3rd batch Con: 7.158 ± 0.025 KO: 7.165 ± 0.043	Batch effect: F (2, 36) = 28.38 Genotype effect: F (1, 36) = 0.07322 Batch × Genotype interaction: F (2, 36) = 0.7428	P < 0.0001 P = 0.7883 P = 0.4829	** ns ns		1st batch Con: 3.30 ± 0.30 KO: 3.64 ± 0.32 2nd batch Con: 3.24 ± 0.50 KO: 3.25 ± 0.10 3rd batch Con: 3.19 ± 0.36 KO: 3.29 ± 0.29	Batch effect: F (2, 36) = 2.520 Genotype effect: F (1, 36) = 1.953 Batch × Genotype interaction: F (2, 36) = 0.9446	P = 0.0945 P = 0.1709 P = 0.3983	ns ns ns
	Glra4 KO	n	1	Con: 6.993 ± 0.013 KO: 6.998 ± 0.014	F (5, 5) = 1.121	P = 0.5454	ns		Con: 3.48 ± 0.17 KO: 3.43 ± 0.19	F (5, 5) = 1.169	P = 0.6396	ns
	Grin1 KO (postnatal)	n	1	Con: 6.829 ± 0.027 KO: 6.843 ± 0.020	F (5, 5) = 1.738	P = 0.3495	ns		Con: 3.63 ± 0.30 KO: 3.53 ± 0.27	F (5, 5) = 1.214	P = 0.5603	ns
	Grin1 KO (adult)	n	1	Con: 6.814 ± 0.033 KO: 6.815 ± 0.035	F (5, 4) = 1.141	P = 0.9515	ns		Con: 3.34 ± 0.23 KO: 3.55 ± 0.40	F (5, 4) = 3	P = 0.3269	ns
	Gunn rat	n	1	Con: 7.093 ± 0.029 Gunn: 7.092 ± 0.033	F (4, 5) = 1.286	P = 0.9819	ns		Con: 3.10 ± 0.09 Gunn: 3.06 ± 0.19	F (4, 5) = 4.75	P = 0.6618	ns
	Hivep2 KO	y	1	Con: 7.196 ± 0.014 KO: 7.168 ± 0.013	F (5, 4) = 1.074	P = 0.0094	**		Con: 2.55 ± 0.19 KO: 2.98 ± 0.18	F (5, 4) = 1.094	P = 0.0038	**
	Hyponatremia	n	1	Con: 7.012 ± 0.034 Hypona: 6.980 ± 0.026	F (7, 7) = 1.668	P = 0.0532	#		Con: 3.19 ± 0.22 Hypona: 3.33 ± 0.18	F (7, 7) = 1.484	P = 0.1995	ns
	Il18 KO	n	1	Con: 7.111 ± 0.017 KO: 7.063 ± 0.022	F (4, 4) = 1.708	P = 0.0048	**		Con: 3.06 ± 0.18 KO: 3.50 ± 0.19	F (4, 4) = 1.061	P = 0.0054	**
	Ketamine treatment	n	2	1st batch Con: 7.112 ± 0.021 KET: 7.086 ± 0.026 2nd batch Con: 7.056 ± 0.024 KET: 7.075 ± 0.036	F (2, 37) = 2.074	P = 0.1401	ns		1st batch Con: 2.90 ± 0.13 KET: 3.10 ± 0.31 2nd batch Con: 3.40 ± 0.30 KET: 3.34 ± 0.30	F (2, 37) = 0.9073	P = 0.4124	ns
	Mdga1 KO	n	1	Con: 6.942 ± 0.014 KO: 6.956 ± 0.031	F (5, 5) = 4.951	P = 0.3302	ns		Con: 3.12 ± 0.10 KO: 3.20 ± 0.23	F (5, 5) = 5.379	P = 0.4302	ns
	Mda2 KO	n	1	Con: 6.956 ± 0.010 KO: 6.960 ± 0.023	F (5, 5) = 5.792	P = 0.6777	ns		Con: 3.08 ± 0.16 KO: 3.07 ± 0.14	F (5, 5) = 1.375	P = 0.8501	ns
	Methamphetamine treatment	n	2	Con: 7.112 ± 0.021 METH: 7.134 ± 0.036	F (2, 17) = 4.817	P = 0.0220	*		Con: 2.90 ± 0.13 METH: 2.74 ± 0.11	F (2, 17) = 5.314	P = 0.0161	*		Control vs. Ketamine100: Adjusted P = 0.2559 Control vs. Methamphetamine3: Adjusted P = 0.3956 Ketamine100 vs. Methamphetamine3: Adjusted P = 0.0170	Control vs. Ketamine100: Adjusted P = 0.2160 Control vs. Methamphetamine3: Adjusted P = 0.3753 Ketamine100 vs. Methamphetamine3: Adjusted P = 0.0123
	Nhe5 KO (1st & 2nd)	y	3	1st batch Con: 7.198 ± 0.027 KO: 7.176 ± 0.051 2nd batch Con: 7.125 ± 0.038 KO: 7.056 ± 0.034	Batch effect: F (1, 14) = 25.16 Genotype effect: F (1, 14) = 5.541 Batch × Genotype interaction: F (1, 14) = 1.464	P = 0.0002 P = 0.0337 P = 0.2464	** * ns		1st batch Con: 3.03 ± 0.15 KO: 3.24 ± 0.11 2nd batch Con: 3.10 ± 0.22 KO: 3.22 ± 0.36	Batch effect: F (1, 14) = 0.03952 Genotype effect: F (1, 14) = 1.936 Batch × Genotype interaction: F (1, 14) = 0.1363	P = 0.8453 P = 0.1858 P = 0.7175	ns ns ns
	Nlgn3-R451C Tg	n	1	Con: 7.096 ± 0.016 Tg: 7.097 ± 0.033	F (7, 5) = 4.273	P = 0.9932	ns		Con: 3.00 ± 0.20 Tg: 3.04 ± 0.25	F (7, 5) = 1.567	P = 0.7686	ns
	Nr3c1 Tg	y	1	Con: 6.914 ± 0.014 Tg: 6.903 ± 0.022	F (14, 9) = 2.535	P = 0.1832	ns		Con: 2.39 ± 0.19 Tg: 2.34 ± 0.19	F (14, 9) = 1.032	P = 0.5242	ns
	Nrgn KO	y	1	Con: 7.162 ± 0.020 KO: 7.104 ± 0.038	F (4, 5) = 3.752	P = 0.0089	**		Con: 2.58 ± 0.13 KO: 2.98 ± 0.25	F (4, 5) = 3.509	P = 0.0080	**
	Oxamate treatment	n	1	Con: 7.098 ± 0.053 OX: 7.091 ± 0.054	F (19, 18) = 1.001	P = 0.6935	ns		Con: 2.83 ± 0.31 OX: 2.80 ± 0.28	F (19, 18) = 1.253	P = 0.7828	ns
	Pacap KO	y	1	Con: 7.134 ± 0.018 KO: 7.093 ± 0.019	F (5, 5) = 1.118	P = 0.0034	**		Con: 2.95 ± 0.33 KO: 3.32 ± 0.24	F (5, 5) = 1.855	P = 0.0513	#
	15q dup (1st & 2nd)	y	3	1st batch Con: 7.065 ± 0.019 Tg: 7.086 ± 0.035 2nd batch Con: 7.090 ± 0.016 Tg: 7.145 ± 0.034	Batch effect: F (1, 18) = 12.96 Genotype effect: F (1, 18) = 10.86 Batch × Genotype interaction: F (1, 18) = 2.229	P = 0.0020 P = 0.0040 P = 0.1528	** ** ns		1st batch Con: 2.87 ± 0.12 Tg: 2.83 ± 0.30 2nd batch Con: 2.98 ± 0.26 Tg: 3.38 ± 0.77	Batch effect: F (1, 18) = 3.402 Genotype effect: F (1, 18) = 1.050 Batch × Genotype interaction: F (1, 18) = 1.467	P = 0.0816 P = 0.3191 P = 0.2415	# ns ns
	Phencyclidine treatment Lurasidone treatment PCP + Lur treatment	n	2	Con: 7.001 ± 0.035 PCP: 7.015 ± 0.047 Lur: 6.952 ± 0.076 PCP+Lur: 6.991 ± 0.054	F (3, 16) = 1.199	P = 0.3420	ns		Con: 3.48 ± 0.28 PCP: 4.60 ± 1.34 Lur: 3.60 ± 0.19 PCP+Lur: 3.42 ± 0.18	F (3, 16) = 3.186	P = 0.0523	#
	Polg1 Tg	n	1	Con: 7.147 ± 0.034 Tg: 7.131 ± 0.011	F (5, 4) = 9.611	P = 0.3385	ns		Con: 3.23 ± 0.56 Tg: 3.24 ± 0.37	F (5, 4) = 2.280	P = 0.9824	ns
	Ppp3r1 KO	y	1	Con: 7.131 ± 0.020 KO: 7.084 ± 0.013	F (5, 4) = 2.397	P = 0.0013	**		Con: 2.90 ± 0.18 KO: 3.24 ± 0.11	F (5, 4) = 2.462	P = 0.0052	**
	Quinpirole treatment	n	1	Con: 6.961 ± 0.038 QNP: 6.989 ± 0.017	F (5, 5) = 5.259	P = 0.1313	ns		Con: 3.57 ± 0.16 QNP: 3.58 ± 0.22	F (5, 5) = 1.863	P = 0.8855	ns
	Reln KO (1st & 2nd)	y	3	1st batch Con: 7.110 ± 0.013 KO: 7.075 ± 0.030 2nd batch Con: 7.105 ± 0.020 KO: 7.088 ± 0.021	Batch effect: F (1, 24) = 0.2413 Genotype effect: F (1, 24) = 8.396 Batch × Genotype interaction: F (1, 24) = 1.073	P = 0.6277 P = 0.0079 P = 0.3106	ns ** ns		1st batch Con: 2.53 ± 0.13 KO: 2.84 ± 0.21 2nd batch Con: 2.83 ± 0.14 KO: 2.90 ± 0.25	Batch effect: F (1, 24) = 4.842 Genotype effect: F (1, 24) = 5.359 Batch × Genotype interaction: F (1, 24) = 2.287	P = 0.0376 P = 0.0295 P = 0.1435	* * ns
	Streptozotocin treatment + chronic restraint stress (1st & 2nd)	n	3	1st batch Con: 7.063 ± 0.030 CRS: 7.026 ± 0.051 STZ: 6.931 ± 0.020 CRS+STZ: 6.920 ± 0.034 2nd batch Con: 6.890 ± 0.036 CRS: 6.878 ± 0.030 STZ: 6.774 ± 0.045 CRS+STZ: 6.777 ± 0.047	Batch effect: F (1, 72) = 282.0 Group effect: F (3, 72) = 50.40 Batch × Genotype interaction: F (3, 72) = 0.4571	P < 0.0001 P < 0.0001 P = 0.7131	** ** ns		1st batch Con: 2.98 ± 0.16 CRS: 3.11 ± 0.20 STZ: 4.54 ± 0.28 CRS+STZ: 4.53 ± 0.55 2nd batch Con: 3.00 ± 0.20 CRS: 2.99 ± 0.27 STZ: 4.27 ± 0.32 CRS+STZ: 4.13 ± 0.40	Batch effect: F (1, 72) = 6.057 Groupe effect: F (3, 72) = 99.19 Batch × Genotype interaction: F (3, 72) = 1.314	P = 0.0163 P < 0.0001 P = 0.2764	* ** ns		Con vs. RS: Adjusted P = 0.2900 Con vs. STZ: Adjusted P < 0.0001 Con vs. STZ CRS: Adjusted P < 0.0001 RS vs. STZ: Adjusted P < 0.0001 RS vs. STZ+RS: Adjusted P < 0.0001 STZ vs. STZ+RS: Adjusted P = 0.9904	Con vs. RS: Adjusted P = 0.9523 Con vs. STZ: Adjusted P < 0.0001 Con vs. STZ CRS: Adjusted P < 0.0001 RS vs. STZ: Adjusted P < 0.0001 RS vs. STZ+RS: Adjusted P < 0.0001 STZ vs. STZ+RS: Adjusted P = 0.8886
	Sciatic nerve cuffing	n	1	Con: 7.039 ± 0.020 Cuff: 7.021 ± 0.038	F (7, 7) = 3.584	P = 0.2574	ns		Con: 3.26 ± 0.14 Cuff: 3.28 ± 0.23	F (7, 7) = 2.559	P = 0.8960	ns
	Scn2a KO	y	1	Con: 6.943 ± 0.031 KO: 6.931 ± 0.015	F (6, 6) = 4.284	P = 0.3830	ns		Con: 2.83 ± 0.25 KO: 3.10 ± 0.16	F (6, 6) = 2.339	P = 0.0331	*
	Sert KO	y	1	Con: 7.120 ± 0.025 KO: 7.052 ± 0.025	F (5, 5) = 1.025	P = 0.0008	**		Con: 2.67 ± 0.18 KO: 3.12 ± 0.35	F (5, 5) = 3.967	P = 0.0180	*
	Shank2 KO	n	1	Con: 6.867 ± 0.035 KO: 6.933 ± 0.046	F (4, 5) = 1.716	P = 0.0229	*		Con: 3.15 ± 0.31 KO: 2.56 ± 0.21	F (4, 5) = 2.302	P = 0.0059	**
	Shank3 KO	n	1	Con: 7.109 ± 0.031 KO: 7.101 ± 0.025	F (7, 8) = 1.581	P = 0.5904	ns		Con: 3.03 ± 0.18 KO: 3.04 ± 0.17	F (7, 8) = 1.109	P = 0.8255	ns
	Snap25-S187A Tg	y	1	Con: 6.991 ± 0.013 Tg: 6.939 ± 0.023	F (9, 9) = 3.001	P < 0.0001	**		Con: 3.23 ± 0.14 Tg: 3.67 ± 0.25	F (9, 9) = 3.099	P = 0.0001	**
	Social defeat stress (acute)	n	1	Con: 7.133 ± 0.011 SDS: 7.077 ± 0.009	F (4, 4) = 1.646	P < 0.0001	**		Con: 3.26 ± 0.11 SDS: 3.62 ± 0.13	F (4, 4) = 1.308	P = 0.0016	**
	Social defeat stress (chronic) (1st-3rd)	y	3	1st batch Con: 7.104 ± 0.025 SDS: 7.075 ± 0.027 2nd batch Con: 7.126 ± 0.013 SDS: 7.098 ± 0.021 3rd batch Con: 7.183 ± 0.013 SDS: 7.167 ± 0.018	Batch effect: F (2, 72) = 147.7 Group effect: F (1, 72) = 23.20 Batch × Genotype interaction: F (2, 72) = 1.067	P < 0.0001 P < 0.0001 P = 0.3495	** ** ns		1st batch Con: 3.58 ± 0.25 SDS: 3.60 ± 0.24 2nd batch Con: 3.15 ± 0.14 SDS: 3.37 ± 0.18 3rd batch Con: 2.74 ± 0.12 SDS: 2.82 ± 0.15	Batch effect: F (2, 72) = 153.6 Groupe effect: F (1, 72) = 5.523 Batch × Genotype interaction: F (2, 72) = 1.312	P < 0.0001 P = 0.0215 P = 0.2757	** * ns
	Stxbp1 KO	n	1	Con: 7.152 ± 0.034 KO: 7.177 ± 0.021	F (4, 4) = 2.637	P = 0.2014	ns		Con: 2.92 ± 0.28 KO: 2.80 ± 0.23	F (4, 4) = 1.400	P = 0.4813	ns
	Syngap1 KO	y	1	Con: 7.003 ± 0.028 KO: 6.991 ± 0.027	F (9, 9) = 1.080	P = 0.3585	ns		Con: 3.27 ± 0.28 KO: 3.41 ± 0.28	F (9, 9) = 1.040	P = 0.2813	ns
	Thalidomide treatment	n	1	Con: 6.934 ± 0.019 TH: 6.936 ± 0.026	F (19, 18) = 1.575	P = 0.3049	ns		Con: 3.26 ± 0.22 TH: 3.34 ± 0.24	F (19, 18) = 1.212	P = 0.2744	ns
	Tnxb KO (1st & 2nd)	n	3	1st batch Con: 6.908 ± 0.055 KO: 6.957 ± 0.033 2nd batch Con: 6.973 ± 0.037 KO: 6.992 ± 0.013	Batch effect: F (1, 23) = 12.47 Genotype effect: F (1, 23) = 5.594 Batch × Genotype interaction: F (1, 23) = 1.165	P = 0.0018 P = 0.0268 P = 0.2917	** * ns		1st batch Con: 4.47 ± 0.65 KO: 3.80 ± 0.42 2nd batch Con: 3.74 ± 0.31 KO: 3.64 ± 0.18	Batch effect: F (1, 23) = 7.091 Genotype effect: F (1, 23) = 5.296 Batch × Genotype interaction: F (1, 23) = 2.944	P = 0.0139 P = 0.0308 P = 0.0996	* * #
	Trx1 KO	n	1	Con: 7.023 ± 0.036 KO: 7.030 ± 0.046	F (4, 4) = 1.688	0.8073	ns		Con: 3.00 ± 0.35 KO: 3.10 ± 0.35	F (4, 4) = 1.042	P = 0.6634	ns
	Tsc1 KO (11w 1st, 11w 2nd & 18w)	n	3	11w - 1st batch Con: 6.865 ± 0.043 KO: 6.823 ± 0.033 11w - 2nd batch Con: 7.072 ± 0.020 KO: 6.914 ± 0.043 18w Con: 7.038 ± 0.045 KO: 6.957 ± 0.029	Batch effect: F (2, 35) = 69.33 Genotype effect: F (1, 35) = 53.78 Batch × Genotype interaction: F (2, 35) = 5.758	P < 0.0001 P < 0.0001 P = 0.0069	** ** **		11w - 1st batch Con: 3.10 ± 0.31 KO: 3.37 ± 0.08 11w - 2nd batch Con: 3.25 ± 0.19 KO: 3.93 ± 0.43 18w Con: 3.33 ± 0.45 KO: 3.71 ± 0.32	Batch effect: F (2, 35) = 3.436 Genotype effect: F (1, 35) = 14.47 Batch × Genotype interaction: F (2, 35) = 0.8696	P = 0.0434 P = 0.0005 P = 0.4280	* ** ns
	Valproic acid treatment	n	1	Con: 6.985 ± 0.032 VPA: 6.959 ± 0.038	F (13, 13) = 1.467	P = 0.0703	#		Con: 3.36 ± 0.17 VPA: 3.30 ± 0.14	F (13, 13) = 1.440	P = 0.3420	ns
Confirmatory cohort	Act Tg	y	1	Con: 6.997 ± 0.019 Tg: 6.991 ± 0.024	F (16, 14) = 1.573	P = 0.4234			Con: 3.49 ± 0.23 Tg: 3.56 ± 0.28	F (16, 14) = 1.486	P = 0.4377
	Actl6b KO	y	1	Con: 7.045 ± 0.015 KO: 7.028 ± 0.024	F (9, 9) = 2.630	P = 0.0750	#		Con: 2.78 ± 0.19 KO: 3.14 ± 0.18	F (9, 9) = 1.039	P = 0.0004	**
	Aldh3a2 KO	y	1	Con: 6.965 ± 0.044 KO: 6.968 ± 0.052	F (6, 10) = 1.376	P = 0.8925			Con: 2.79 ± 0.42 KO: 2.71 ± 0.41	F(10, 6) = 1.062	P = 0.7067
	B2m KO	y	1	Con: 6.972 ± 0.017 KO: 6.978 ± 0.019	F (9, 9) = 1.322	P = 0.5203			Con: 2.98 ± 0.09 KO: 2.89 ± 0.21	F (9, 9) = 5.118	P = 0.2266
	Begain KO	y	1	Con: 7.023 ± 0.011 KO: 7.040 ± 0.020	F (16, 6) = 3.054	P = 0.0465	*		Con: 3.39 ± 0.36 KO: 3.30 ± 0.26	F (6, 16) = 1.912	P = 0.5215
	Caskin1 KO	y	1	Con: 7.009 ± 0.026 KO: 7.009 ± 0.020	F (6, 7) = 1.585	P = 0.9543			Con: 2.91 ± 0.20 KO: 2.89 ± 0.16	F (6, 7) = 1.719	P = 0.7772
	Cdkl5-K42R KI	n	1	Con: 7.024 ± 0.024 KI: 7.022 ± 0.018	F (9, 9) = 1.730	P = 0.8391			Con: 2.72 ± 0.17 KO: 2.76 ± 0.13	F (9, 9) = 1.561	P = 0.5655
	Cntn4 KO	y	1	Con: 7.046 ± 0.017 KO: 7.035 ± 0.028	F (11, 11) = 2.759	P = 0.2428			Con: 3.28 ± 0.14 KO: 3.40 ± 0.21	F (11, 11) = 2.247	P = 0.1052
	Csgalnact1 KO	y	1	Con: 7.009 ± 0.033 KO: 7.023 ± 0.017	F (10, 11) = 3.664	P = 0.2134			Con: 3.11 ± 0.21 KO: 2.88 ± 0.21	F (11, 10) = 1.017	P = 0.0155	*
	Eif2a KO	y	1	Con: 7.053 ± 0.023 KO: 7.039 ± 0.025	F (18, 16) = 1.259	P = 0.0898	#		Con: 2.99 ± 0.20 KO: 3.11 ± 0.23	F (18, 16) = 1.338	P = 0.1095
	Eif2d KO	y	1	Con: 7.064 ± 0.035 KO: 7.057 ± 0.032	F (19, 18) = 1.177	P = 0.5012			Con: 3.37 ± 0.25 KO: 3.46 ± 0.25	F (18, 19) = 1.073	P = 0.2278
	Fst Tg	y	1	Con: 7.016 ± 0.016 Tg: 7.002 ± 0.020	F (14, 14) = 1.597	P = 0.0398	*		Con: 2.86 ± 0.19 Tg: 3.26 ± 0.20	F (14, 14) = 1.161	P < 0.0001	**
	GluA1-C811S KI	y	1	Con: 7.085 ± 0.016 KI: 7.077 ± 0.020	F (8, 11) = 1.527	P = 0.3530			Con: 3.17 ± 0.14 KO: 3.24 ± 0.16	F ( 8, 11) = 1.345	P = 0.2440
	Grin1-Rgsc174 Mut	n	1	Con: 7.004 ± 0.025 Mut: 7.000 ± 0.052	F (9, 9) = 4.273	P = 0.8261			Con: 3.11 ± 0.14 Mut: 3.09 ± 0.20	F (9, 9) = 1.952	P = 0.8024
	hMfn2-D210V Tg	n	1	Con: 6.931 ± 0.016 Tg: 6.890 ± 0.020	F (3, 2) = 1.561	P = 0.0336	*		Con: 3.47 ± 0.15 KO: 4.45 ± 0.13	F (2, 3) = 1.400	P = 0.0002	**
	Il1r1 KO	y	1	Con: 7.088 ± 0.020 KO: 7.092 ± 0.021	F (11, 11) = 1.171	P = 0.6389			Con: 2.92 ± 0.20 KO: 2.89 ± 0.22	F (11, 11) = 1.115	P = 0.7728
	Isolation stress (chick)		1	Con: 6.886 ± 0.040 IS: 6.843 ± 0.039	F (7, 7) = 1.056	P = 0.0467	*		Con: 4.15 ± 0.34 IS: 4.56 ± 0.48	F (7, 7) = 1.974	P = 0.0681	#
	LINC00643 KO	y	1	Con: 7.040 ± 0.032 KO: 7.048 ± 0.035	F (17, 17) = 1.163	P = 0.4364			Con: 2.86 ± 0.21 KO: 2.83 ± 0.19	F (17, 17) = 1.136	P = 0.6202
	Lis1 KO	n	1	Con: 7.148 ± 0.032 KO: 7.159 ± 0.028	F (13, 13) = 1.350	P = 0.3166			Con: 3.07 ± 0.26 KO: 3.05 ± 0.15	F (13, 13) = 3.012	P = 0.7925
	Ndufs4 KO	n	1	Con: 7.027 ± 0.029 KO: 6.954 ± 0.064	F (6, 6) = 4.917	P = 0.0168	*		Con: 3.33 ± 0.19 KO: 4.70 ± 0.89	F (6, 6) = 22.31	P = 0.0018	**
	nSP treatment	y	1	Con: 7.056 ± 0.030 nSP: 7.054 ± 0.027	F (19, 18) = 1.175	P = 0.7889			Con: 2.41 ± 0.16 nSP: 2.36 ± 0.15	F (19, 18) = 1.207	P = 0.4008
	Oprk1 KO	n	1	Con: 6.973 ± 0.013 KO: 6.975 ± 0.018	F (8, 4) = 2.063	P = 0.8528			Con: 3.16 ± 0.13 KO: 3.32 ± 0.12	F (4, 8) = 1.246	P = 0.0383	*
	Papst1 KO	y	1	Con: 7.051 ± 0.030 KO: 7.061 ± 0.005	F (7, 3) = 37.91	P = 0.5469			Con: 3.68 ± 0.19 KO: 3.53 ± 0.10	F (7, 3) = 3.974	P = 0.1757
	Picrotoxin treatment (1st & 2nd)	n	3	1st batch Con: 6.975 ± 0.024 Picro: 6.943 ± 0.022 2nd batch Con: 6.966 ± 0.019 Picro: 6.966 ± 0.020	Batch effect: F (1, 50) = 1.669 Treatment effect: F (1, 50) = 7.617 Batch × Treatment interaction: F (1, 50) = 7.641	P = 0.2023 P = 0.0081 P = 0.0080	** **		1st batch Con: 3.44 ± 0.13 Picro: 3.58 ± 0.17 2nd batch Con: 3.28 ± 0.12 Picro: 3.29 ± 0.12	Batch effect: F (1, 50) = 36.27 Treatment effect: F (1, 50) = 4.049 Batch × Treatment interaction: F (1, 50) = 2.568	P < 0.0001 P = 0.0496 P = 0.1153	** *
	Polb KO	y	1	Con: 6.993 ± 0.018 KO: 6.983 ± 0.019	F (9, 8) = 1.033	P = 0.2691			Con: 3.03 ± 0.13 KO: 3.09 ± 0.14	F (9, 8) = 1.200	P = 0.3877
	Prickle1 KO	n	1	Con: 7.046 ± 0.021 KO: 7.040 ± 0.020	F (20, 11) = 1.093	P = 0.4304			Con: 3.20 ± 0.25 KO: 3.32 ± 0.36	F (11, 20) = 2.136	P = 0.2828
	Prrt3 KO	y	1	Con: 6.977 ± 0.014 KO: 6.972 ± 0.017	F (9, 9) = 1.443	P = 0.5125			Con: 3.24 ± 0.18 KO: 3.19 ± 0.14	F (9, 9) = 1.680	P = 0.4900
	RNG105 KO	y	1	Con: 7.046 ± 0.022 KO: 7.030 ± 0.016	F (11, 9) = 1.820	P = 0.0580	#		Con: 3.56 ± 0.18 KO: 3.57 ± 0.16	F (11, 9) = 1.367	P = 0.8756
	Scn1a-A1783V KI	n	1	Con: 7.011 ± 0.032 KI: 6.958 ± 0.020	F (8, 8) = 2.758	P = 0.0008	**		Con: 3.11 ± 0.30 KO: 3.70 ± 0.23	F (8, 8) = 1.735	P = 0.0003	**
	Scop KO	y	1	Con: 7.009 ± 0.011 KO: 7.008 ± 0.014	F (6, 8) = 1.523	P = 0.8797			Con: 2.96 ± 0.18 KO: 2.96 ± 0.17	F ( 8, 6) = 1.110	P = 0.9861
	Sleep disturbance	n		Con: 6.964 ± 0.009 SD: 6.944 ± 0.011	F (12, 6) = 1.597	P = 0.0007	**		Con: 3.21 ± 0.13 SD: 3.44 ± 0.13	F (6, 12) = 1.138	P = 0.0016	**
	Srr KO	n	1	Con: 7.024 ± 0.038 KO: 7.023 ± 0.034	F (13, 10) = 1.290	P = 0.9387			Con: 4.07 ± 0.58 KO: 4.28 ± 0.88	F (10, 13) = 2.335	P = 0.4789
	Stx1a-R151G KI	y	1	Con: 7.058 ± 0.026 KI: 7.040 ± 0.024	F (18, 16) = 1.137	P = 0.0363	*		Con: 2.77 ± 0.21 KO: 2.92 ± 0.24	F (16, 18) = 1.220	P = 0.0460	*
	Tgm3 KO	n	1	Con: 7.008 ± 0.022 KO: 7.012 ± 0.023	F (9, 9) = 1.090	P = 0.7168			Con: 3.28 ± 0.15 KO: 3.30 ± 0.18	F (9, 9) = 1.296	P = 0.7907
	TMEM155 KO	y	1	Con: 7.054 ± 0.024 KO: 7.051 ± 0.032	F (17, 17) = 1.729	P = 0.7635			Con: 3.25 ± 0.16 KO: 3.28 ± 0.17	F (17, 17) = 1.045	P = 0.5451
	Trpm2 KO	y	1	Con: 6.976 ± 0.021 KO: 6.980 ± 0.022	F (15, 12) = 1.094	P = 0.5450			Con: 3.20 ± 0.20 KO: 3.22 ± 0.12	F (12, 15) = 2.786	P = 0.0640	#
	Ts1Cje	y	1	Con: 7.053 ± 0.017 Ts1Cje: 7.034 ± 0.022	F (15, 12) = 1.676	P = 0.0159	*		Con: 3.13 ± 0.21 Ts1Cje: 3.31 ± 0.22	F (15, 12) = 1.181	P = 0.0383	*
	Tsc2 KO	n	1	Con: 6.973 ± 0.033 KO: 6.972 ± 0.019	F (7, 7) = 2.979	P = 0.9428			Con: 2.99 ± 0.19 KO: 2.99 ± 0.15	F (7, 7) = 1.672	P > 0.9999
	Ube3am-/p+	n	1	Con: 7.000 ± 0.022 Mut: 7.011 ± 0.043	F (7, 7) = 3.701	P = 0.4999			Con: 3.29 ± 0.12 KO: 3.45 ± 0.19	F (7, 7) = 2.207	P = 0.0586	#
	Vmat1 KI	y	2	Con (Asn/Asn): 7.078 ± 0.016 KI (Thr/Thr): 7.077 ± 0.015 KI (Thr/Ile): 7.091 ± 0.020 KI (Ile/Ile): 7.105 ± 0.027	F (3, 28) = 1.025	P = 0.0462	*		Con (Asn/Asn): 2.94 ± 0.29 KI (Thr/Thr): 2.84 ± 0.24 KI (Thr/Ile): 2.63 ± 0.26 KI (Ile/Ile): 2.67 ± 0.34	F (3, 28) = 2.237	P = 0.1059	*		Vmat1(Asn/Asn vs. Vmat1(Thr/Thr): Adjusted P = 0.9996 Vmat1(Asn/Asn vs. Vmat1(Thr/Ile): Adjusted P = 0.4092 Vmat1(Asn/Asn vs. Vmat1(Ile/Ile): Adjusted P = 0.0402	Vmat1(Asn/Asn vs. Vmat1(Thr/Thr): Adjusted P = 0.7873 Vmat1(Asn/Asn vs. Vmat1(Thr/Ile): Adjusted P = 0.0716 Vmat1(Asn/Asn vs. Vmat1(Ile/Ile): Adjusted P = 0.1805
	Zeb2 KO	n	1	Con: 6.981 ± 0.022 KO: 6.978 ± 0.031	F (8, 8) = 2.043	P = 0.7775			Con: 3.28 ± 0.17 KO: 3.46 ± 0.11	F (8, 8) = 2.304	P = 0.0195
	Zfh5s KO	n	1	Con: 6.994 ± 0.020 KO: 6.996 ± 0.010	F (11, 11) = 4.202	P = 0.8659			Con: 3.17 ± 0.21 KO: 3.06 ± 0.25	F (11, 11) = 1.477	P = 0.2594
