# Supplementary material for: Large-scale animal model study uncovers altered brain pH and lactate levels as a transdiagnostic endophenotype of neuropsychiatric disorders involving cognitive impairment
Source: eLife. 2024 Mar 26;12:RP89376. doi: 10.7554/eLife.89376 (PMC10965225; doi:10.7554/eLife.89376)
Supplement: Supplementary file 4. [file elife-89376-supp4.xlsx]

## Sheet: TableS4
Supplementary File 4. Source of behavioral data used in prediction analysis
		Strain/condition	Source (reference)
Exploratory cohort	1	APP Tg	In-house data
	2	Arid1b KO	(1)
	3	Barp KO	(2), MPD
	4	BTBR	(3,4)
	5	Camk2a KO	(5,6), MPD, in-house data
	6	CFA treatment	In-house data
	7	Chd8 KO	(7)
	8	Corticosterone treatment	In-house data
	9	Disc1-L100P mutant	(8), MPD
	10	Disc1-Q31L mutant	(8), MPD
	11	Gasc1 hypomorph	(9)
	12	Hivep2 KO	(10), MPD, in-house data
	13	Nhe5 KO	In-house data
	14	Nr3c1 Tg	In-house data
	15	Nrgn KO	(11), MPD
	16	Pacap KO	(12), MPD
	17	15q dup	(13), MPD
	18	Ppp3r1 KO	In-house data
	19	Reln Tg	(14)
	20	Scn2a KO	(15), MPD
	21	Sert KO	In-house data
	22	Snap25-S187A KI	(16), MPD
	23	Social defeat stress (repeated)	(17,18), in-house data
	24	Syngap1 KO	(19), MPD
Confirmatory cohort	1	Act Tg	In-house data
	2	Actl6b KO	(20)
	3	Aldh3a2 KO	(21), (22), MPD
	4	B2m KO	In-house data
	5	Begain KO	In-house data
	6	Caskin1 KO	(23)
	7	Cntn4 KO	In-house data
	8	Csgalnact1 KO	(24), MPD
	9	Eif2a KO	In-house data
	10	Eif2d KO	In-house data
	11	Fst Tg	In-house data
	12	GluA1-C811S KI	In-house data
	13	Il1r1 KO	In-house data
	14	LINC00643 KO	In-house data
	15	nSP treatment	(25), in-house data
	16	Papst1 KO	In-house data
	17	Polb KO	(26)
	18	Prrt3 KO	(27)
	19	RNG105 KO	(28), MPD
	20	Scop KO	In-house data
	21	Stx1a-R151G KI	(29), MPD
	22	TMEM155 KO	In-house data
	23	Trpm2 KO	(30), MPD
	24	Ts1Cje	(31), MPD
	25–27	Vmat1 KI	(32)
MPD, Mouse Phenotype Database (http://www.mouse-phenotype.org/)
References
1. Shibutani M, Horii T, Shoji H, Morita S, Kimura M, Terawaki N, et al. (2017): Arid1b haploinsufficiency causes abnormal brain gene expression and autism-related behaviors in mice. Int J Mol Sci 18: 1872.
2. Nakao A, Miki T, Shoji H, Nishi M, Takeshima H, Miyakawa T, Mori Y (2015): Comprehensive behavioral analysis of voltage-gated calcium channel beta-anchoring and -regulatory protein knockout mice. Front Behav Neurosci 9. https://doi.org/10.3389/fnbeh.2015.00141
3. McFarlane HG, Kusek GK, Yang M, Phoenix JL, Bolivar VJ, Crawley JN (2008): Autism-like behavioral phenotypes in BTBR T+tf/J mice. Genes Brain Behav 7: 152–163.
4. Silverman JL, Yang M, Turner SM, Katz AM, Bell DB, Koenig JI, Crawley JN (2010): Low stress reactivity and neuroendocrine factors in the BTBR T+tf/J mouse model of autism. Neuroscience 171: 1197–1208.
5. Yamasaki N, Maekawa M, Kobayashi K, Kajii Y, Maeda J, Soma M, et al. (2008): Alpha-CaMKII deficiency causes immature dentate gyrus, a novel candidate endophenotype of psychiatric disorders. Mol Brain 1: 6.
6. Shoji H, Hagihara H, Takao K, Hattori S, Miyakawa T (2012): T-maze forced alternation and left-right discrimination tasks for assessing working and reference memory in mice. JoVE J Vis Exp e3300.
7. Katayama Y, Nishiyama M, Shoji H, Ohkawa Y, Kawamura A, Sato T, et al. (2016): CHD8 haploinsufficiency results in autistic-like phenotypes in mice. Nature 537: 675–679.
8. Shoji H, Toyama K, Takamiya Y, Wakana S, Gondo Y, Miyakawa T (2012): Comprehensive behavioral analysis of ENU-induced Disc1-Q31L and -L100P mutant mice. BMC Res Notes 5: 108.
9. Taga T, Yamaguchi Y, Kokubo Y, Hattori S, Takao K, Inazawa J, et al. (2011): Establishment of a new mouse model of neurodevelopmental disorder. J Pharmacol Sci 115: 35–35.
10. Takao K, Kobayashi K, Hagihara H, Ohira K, Shoji H, Hattori S, et al. (2013): Deficiency of Schnurri-2, an MHC enhancer binding protein, induces mild chronic inflammation in the brain and confers molecular, neuronal, and behavioral phenotypes related to schizophrenia. Neuropsychopharmacology 38: 1409–1425.
11. Nakajima R, Hattori S, Funasaka T, Huang FL, Miyakawa T (n.d.): Decreased nesting behavior, selective increases in locomotor activity in a novel environment, and paradoxically increased open arm exploration in Neurogranin knockout mice. Neuropsychopharmacol Rep n/a. https://doi.org/10.1002/npr2.12150
12. Hattori S, Takao K, Tanda K, Toyama K, Shintani N, Baba A, et al. (2012): Comprehensive behavioral analysis of pituitary adenylate cyclase-activating polypeptide (PACAP) knockout mice. Front Behav Neurosci 6. https://doi.org/10.3389/fnbeh.2012.00058
13. Nakatani J, Tamada K, Hatanaka F, Ise S, Ohta H, Inoue K, et al. (2009): Abnormal behavior in a chromosome- engineered mouse model for human 15q11-13 duplication seen in autism. Cell 137: 1235–1246.
14. Sakai K, Shoji H, Kohno T, Miyakawa T, Hattori M (2016): Mice that lack the C-terminal region of Reelin exhibit behavioral abnormalities related to neuropsychiatric disorders [no. 1]. Sci Rep 6: 28636.
15. Tatsukawa T, Raveau M, Ogiwara I, Hattori S, Miyamoto H, Mazaki E, et al. (2019): Scn2a haploinsufficient mice display a spectrum of phenotypes affecting anxiety, sociability, memory flexibility and ampakine CX516 rescues their hyperactivity. Mol Autism 10: 15.
16. Ohira K, Kobayashi K, Toyama K, Nakamura HK, Shoji H, Takao K, et al. (2013): Synaptosomal-associated protein 25 mutation induces immaturity of the dentate granule cells of adult mice. Mol Brain 6: 12.
17. Adamcio B, Havemann-Reinecke U, Ehrenreich H (2009): Chronic psychosocial stress in the absence of social support induces pathological pre-pulse inhibition in mice. Behav Brain Res 204: 246–249.
18. Brzózka MM, Fischer A, Falkai P, Havemann-Reinecke U (2011): Acute treatment with cannabinoid receptor agonist WIN55212.2 improves prepulse inhibition in psychosocially stressed mice. Behav Brain Res 218: 280–287.
19. Nakajima R, Takao K, Hattori S, Shoji H, Komiyama NH, Grant SGN, Miyakawa T (2019): Comprehensive behavioral analysis of heterozygous Syngap1 knockout mice. Neuropsychopharmacol Rep 39: 223–237.
20. Wenderski, W. et al. Loss of the neural-specific BAF subunit ACTL6B relieves repression of early response genes and causes recessive autism. Proc. Natl. Acad. Sci. 117, 10055–10066 (2020).
21. Kanetake, T. et al. Neural symptoms in a gene knockout mouse model of Sjögren-Larsson syndrome are associated with a decrease in 2-hydroxygalactosylceramide. FASEB J. 33, 928–941 (2019).
22. Naganuma, T. et al. Disruption of the Sjögren-Larsson Syndrome Gene Aldh3a2 in Mice Increases Keratinocyte Growth and Retards Skin Barrier Recovery. J. Biol. Chem. 291, 11676–11688 (2016).
23. Katano, T. et al. Distribution of Caskin1 protein and phenotypic characterization of its knockout mice using a comprehensive behavioral test battery. Mol. Brain 11, 63 (2018).
24. Yoshioka, N. et al. Abnormalities in perineuronal nets and behavior in mice lacking CSGalNAcT1, a key enzyme in chondroitin sulfate synthesis. Mol. Brain 10, 47 (2017).
25. Morishita, Y. et al. Postnatal effects of prenatal treatment of amorphous nanosilica. Toxicol. Lett. 205, S285–S286 (2011).
26. Uyeda, A. et al. Suppression of DNA double-strand break formation by DNA polymerase β in active DNA demethylation is required for development of hippocampal pyramidal neurons. J. Neurosci. 40, 9012–9027 (2020).
27. Yamamoto, T. et al. Comprehensive behavioral test battery analyses of the gene targeted mice of Prrt3, an orphan metabo-tropic receptor. 91st Annu. Meet. Physiol. Soc. Jpn. Abstr. 1P-009 (2014).
28. Ohashi, R., Takao, K., Miyakawa, T. & Shiina, N. Comprehensive behavioral analysis of RNG105 (Caprin1) heterozygous mice: Reduced social interaction and attenuated response to novelty. Sci. Rep. 6, 20775 (2016).
29. Watanabe, Y. et al. Point mutation in syntaxin-1A causes abnormal vesicle recycling, behaviors, and short term plasticity. J. Biol. Chem. 288, 34906–34919 (2013).
30. Andoh, C. et al. TRPM2 confers susceptibility to social stress but is essential for behavioral flexibility. Brain Res. 1704, 68–77 (2019).
31. Shimohata, A. et al. Ts1Cje Down syndrome model mice exhibit environmental stimuli-triggered locomotor hyperactivity and sociability concurrent with increased flux through central dopamine and serotonin metabolism. Exp. Neurol. 293, 1–12 (2017).
32. Sato, D. X. et al. Humanized substitutions of Vmat1 in mice alter amygdala-dependent behaviors associated with the evolution of anxiety. 2021.05.18.444749 (2021) doi:10.1101/2021.05.18.444749.
