# Supplementary material for: Large-scale animal model study uncovers altered brain pH and lactate levels as a transdiagnostic endophenotype of neuropsychiatric disorders involving cognitive impairment
Source: eLife. 2024 Mar 26;12:RP89376. doi: 10.7554/eLife.89376 (PMC10965225; doi:10.7554/eLife.89376)
Supplement: Supplementary file 5. [file elife-89376-supp5.xlsx]

## Sheet: TableS5
Supplementary File 5. The effect size values used in prediction analysis
Strain/Condition	pH	Lactate	Openfield test_TotalDistance	Light/dark transition test_Dark-Time	Light/dark transition test_Number of Transitions	Startle response 120dB	Prepulse inhibition test_74-110dB	Prepulse inhibition test_78-110dB	Elevated plus maze test__Percentage open arm stay time	Forced swim test_Immobile	Woking memory
Hivep2	-2.04078	2.34934	1.96755	0.326989	0.603608	-0.657342	-0.911424	-0.438125	0.972562	-1.67855	-2.8914
Ppp3r1	-2.81924	2.26667	2.13227	-1.12823	1.13506	-0.378327	-0.387469	-0.796948	3.05536	-0.281718	-1.32576
Nrgn	-1.94289	1.98748	0.31485	0.197338	-0.701026	-0.0805157	-0.963523	-0.574909	0.725058	-0.433515	-0.779075
Camk2a	-3.01883	3.9598	1.47652	-1.3214	1.2041	-0.782657	-0.31824	0.578442	2.00225	-1.06614	-3.57816
Chd8	-3.30029	2.4588	0.0824558	0.789764	-0.79791	-0.639755	-0.0219066	0.135235	-1.57905	0.0555758	0.0297696
Sert	-2.73026	1.63053	-3.00407	3.46349	-2.25291	0.503881	1.2078	1.38666	-1.06103	-0.0208233	-0.188306
Disc1-L100P	0.107271	-0.136845	-0.147908	-0.536086	0.776502	0.299506	-0.219976	-0.687136	-0.0815104	0.78829	0.516063
Disc1-Q31L	0.421446	0.291111	0.306759	0.0305712	-0.108357	0.0289148	-0.282962	-0.312631	0.265526	0.213287	0.270449
15q dup	1.27627	0.378756	-0.728508	-0.406951	0.917137	0.216979	0.0525194	0.568954	0.411892	0.732807	-0.884953
Nhe5	-1.11579	0.731352	-0.35233	-0.292497	-0.797096	0.182391	0.622671	0.565529	-0.235797	0.352437	0.0668154
Reln	-1.11812	0.829069	0.974571	-0.117582	0.27847	-0.137908	0.174849	0.249119	0.775039	-0.345551	-1.23567
Pacap	-2.17983	1.27786	1.76482	-0.332905	0.164385	-0.547644	-0.157763	-0.0229063	0.394446	-0.402905	-1.11555
Gasc1	-0.668441	1.10262	1.16585	0.00837793	0.487466	0.502607	-0.0382369	-0.706561	0.492515	-2.00773	-1.40309
BTBR	1.00534	-0.839318	1.6653	0.867666	-0.160838	-0.612609	-0.314632	-0.0133184	0.0788165	-1.49543	0.246491
Barp	-0.487187	0.378058	-0.328108	0.453883	-0.886076	-1.73448	0.285032	0.376439	0.444843	-0.493469	0.397057
Arid1b	0.283124	0.248343	-0.879891	0.314673	-0.128923	-0.383955	0.186022	-0.0416654	-0.699451	-0.596422	-0.358929
SDS	-1.13452	0.638531	-0.710037	-0.421214	-0.0251063	0.0394191	-0.359712	-1.1325	-1.12333	0.381465	-0.310087
Snap25	-2.71264	2.16714	0.158692	2.22892	-0.931056	-0.159044	-0.169092	-0.625846	-0.356552	-5.23594	-2.41772
Complete Freund’s adjuvant (CFA)	-0.151097	-0.458675	-0.0958586	0.249383	-0.159695	0.509863	-0.884865	-0.884011	0.247863	-0.0969669	0.142921
APP	-1.52088	2.23208	0.401955	0.314753	0.417676	0.26383	-0.698608	-0.505573	0.406567	-0.400341	-1.99565
Corticosterone	-2.06632	1.73475	-1.05821	-0.000602163	-0.641039	-1.28551	0.00936358	-0.433952	-1.17412	0.0563546	-0.480162
Syngap1	-0.413317	0.496702	1.80619	-0.290683	0.0998772	-0.0695662	-1.01973	-1.3732	1.17328	-1.35915	-0.844008
Scn2a	-0.486139	1.28635	0.74935	1.51757	-0.0617207	-0.218825	-0.181736	-0.383969	0.486315	1.09195	-0.00706453
Nr3c1	-0.59185	-0.263552	0.102353	0.48136	-0.72536	-0.107999	-0.0304298	-0.189449	-0.28203	0.527095	0.328447
B2m	0.293267	-0.559954	-0.0282059	-0.218969	0.657176	0.453478	-0.356127	-0.629831	-0.953576	-0.35026	-0.259258
Prrt3	-0.29883	-0.315179	0.174984	0.0448745	0.434725	0.327876	0.146136	0.184534	0.301241	-0.0639308	-0.125963
Aldh3a2	0.0650574	-0.185929	0.124736	0.641629	-1.30959	0.0816866	-1.37813	-1.3268	-0.0232122	-0.189053	-0.429816
Polb	-0.525171	0.408425	0.0120882	-0.0535048	0.0788521	-1.01998	0.450651	0.481933	0.118787	0.105553	-0.823424
Trpm2	0.220626	0.111433	-0.0277031	-0.0265868	-0.277135	0.0105508	-0.298346	-0.767866	0.132234	0.685855	-0.0475847
Caskin1	0.111703	1.27366	0.00657962	0.703518	0.12306	-0.282305	-0.252033	0.196059	0.0877425	-0.700241	-0.228204
Begain	1.05073	-0.270931	0.356378	-0.0326789	0.592084	0.252772	0.784763	0.943054	0.122219	0.0232258	0.111467
Act	-0.289612	0.280463	-0.562998	-0.184747	-0.376065	-0.506994	0.335999	-0.322348	-0.0299263	0.910196	-0.421566
Ts1Cje	-0.973772	0.817003	1.15974	1.97426	-1.05597	-1.45258	-0.190295	-0.443729	0.149975	-0.23294	0.138581
Cntn4	-0.490001	0.689767	-0.274897	0.450626	-0.206176	-0.043197	0.902373	0.331266	-0.664065	-0.0433645	-0.111696
GluA1-C811S	-0.412844	0.523987	-0.00872193	-0.193199	-0.179584	-0.3266	0.438394	0.617409	-0.0449017	-0.0348598	-0.204012
Papst1	0.448473	-0.993451	0.472433	0.14421	0.0925362	0.200347	0.499561	0.243297	-0.0367338	0.219025	0.255945
Tmem115	-0.103169	0.20375	-0.351538	0.209193	-0.0385922	0.0908765	-0.417784	0.145209	-0.27984	-0.739483	0.108964
Eif2a	-0.58504	0.550939	1.2861	-0.197513	0.502631	-0.332071	-0.546865	-0.8806	0.106349	0.119765	-0.278678
Eif2d	-0.217848	0.392682	-0.359291	0.485281	0.117645	0.00301165	0.188528	0.168401	-0.0618187	0.0407829	-0.486234
RNG105	-0.873537	0.0684405	0.197515	0.324483	-0.166157	-0.103503	-0.0984067	0.0220564	0.0299067	-0.465286	-0.260115
Stx1a-R151G	-0.730543	0.689283	0.0111686	-0.458999	-0.287781	2.08803	0.612272	1.48145	0.0278511	0.441194	-1.03601
Csgalnact1	0.528288	-1.09991	0.455922	0.0648146	0.0304579	0.304045	0.759405	0.494916	0.0653719	0.148089	-0.0588979
Scop	-0.0765485	0.00899342	0.0710996	-0.308015	-0.797615	0.634154	-0.415793	-0.374966	0.0824285	-0.354953	0.130347
nSP	-0.0807891	-0.272634	0.222333	0.271644	0.165228	0.840287	0.17857	0.436418	-0.0405627	-0.198664	-0.0800519
LINC00643	0.262526	-0.166735	0.166347	-0.311755	0.199532	0.286569	0.298011	-0.0486005	0.29061	0.30667	0.115796
Fst	-0.782598	2.04429	0.740364	-0.714764	0.561996	-0.24986	0.486187	0.303632	1.02626	-0.334716	-1.3914
Actl6b	-0.845779	1.93974	3.9211	0.393029	1.48006	-0.345737	-0.908297	-1.24436	1.82299	-2.15792	-2.00225
Vmat1(Thr/Thr)	-0.0471382	-0.397046	-0.2186	-0.286278	0.123259	-0.0242297	-0.244358	-0.425101	0.0088956	-0.0982583	0.0257746
Vmat1(Thr/Ile)	0.678521	-1.11654	0.105795	-0.830315	0.578724	-0.193285	0.104587	0.148953	-0.00876561	-0.0876985	0.505397
Vmat1(Ile/Ile)	1.18745	-0.869874	0.084159	-0.775388	0.323555	-0.0373066	-0.20641	-0.569191	0.0030678	-0.0454758	0.39679
Il1r1	0.193048	-0.119316	-0.204609	-0.0234794	0.377591	0.161291	-0.167252	-0.249825	0.440332	0.00626569	0.133923
